# Supplementary material for: Synthesis of DNA-coupled isoquinolones and pyrrolidines by solid phase ytterbium- and silver-mediated imine chemistry
Source: Royal Society of Chemistry journal article supplement (doi:10.1039/c9md00042a), 2019-01-01
Supplement: c9md00042a1.pdf [file c9md00042a1.pdf]

## Electronic Supplementary Information

# Synthesis of DNA-coupled isoquinolones and pyrrolidines by solid phase ytterbium- and silver-mediated imine chemistry

*Marco Potowski, Verena B. K. Kunig, Florian Losch, Andreas Brunschweiler*

*Faculty of Chemistry and Chemical Biology, TU Dortmund University, Otto-Hahn-Straße 6,  
D-44227 Dortmund, Germany*

| <b>Table of Contents</b>                                                                      | <b>Page</b> |
|-----------------------------------------------------------------------------------------------|-------------|
| <b>Chemistry</b>                                                                              |             |
| General Methods and Materials                                                                 | S2          |
| Representative Procedures                                                                     | S3          |
| <b>Yb(OTf)<sub>3</sub>-mediated Castagnoli-Cushman reaction on CPG-bound oligonucleotides</b> |             |
| Table S1 Optimization (HPLC traces included)                                                  | S8          |
| Table S2 Scope                                                                                | S13         |
| HPLC traces and MALDI-MS spectra of starting materials and products                           | S15         |
| Experiment in solution: Scheme S1 + HPLC traces and MALDI-MS spectra                          | S37         |
| <b>AgOAc-mediated 1,3-dipolar cycloaddition on CPG-bound oligonucleotides</b>                 |             |
| Table S3 Optimization (HPLC traces included)                                                  | S39         |
| Table S4 Scope                                                                                | S43         |
| HPLC traces and MALDI-MS spectra of starting materials and products                           | S45         |
| Experiment in solution: Scheme S2 + HPLC traces and MALDI-MS spectra                          | S67         |
| <b>TFA-mediated Pictet-Spengler reaction on CPG-bound oligonucleotides</b>                    |             |
| Table S5 Investigations on Pictet-Spengler reaction (HPLC traces + MALDI-MS spectra)          | S69         |
| <b>Castagnoli-Cushman reaction on a CPG-bound coding DNA oligonucleotide</b>                  |             |
| Scheme S3 Castagnoli-Cushman reaction on a coding 14mer DNA oligonucleotide                   | S75         |
| HPLC traces and MALDI-MS spectra for intermediates and products                               | S76         |
| <b>DNA ligation</b>                                                                           |             |
| General Methods and Materials                                                                 | S79         |

# Chemistry

## General Methods and Materials

Unless otherwise noted, chemicals were purchased from *abcr*, *Acros Organics*, *Alfa Aesar*, *Fisher Scientific*, *Merck*, *Sigma Aldrich*, *TCI* and *VWR* and were used as provided without further purifications. Dry solvents ( $\text{CH}_2\text{Cl}_2$ , DMF, MeOH, ACN, EtOH, THF, toluene) were used as commercially available.

5'-Aminolinker-modified DNA oligonucleotides bound to controlled pore glass solid support (CPG, 1000 Å porosity) and the hairpin oligonucleotide were synthesized by *IBA* (Göttingen, Germany). The branched oligonucleotide-alkyne conjugate was prepared by DNA solid phase synthesis on a DNA Synthesizer H-8 from *K&A Laborgeraete GbR* on a 1 µmol scale using standard CPG-based phosphoramidite methods. The DNA phosphoramidites were used with the 4,4'-dimethoxytrityl (DMT) and β-cyanoethyl (CE) protecting groups (DMT-dA-CEP, DMT-dT-CEP, DMT-dG-CEP, DMT-dC-CEP and DMT-Ethynyl-dU-CEP). 5-(Benzylthio)-1*H*-tetrazole (BTT) was used as activator.

Oligonucleotide-small molecule conjugates bound to CPG were filtered and washed through synthesis columns using a vacuum manifold (*Vac-Man*<sup>®</sup>) from *Promega*.

**Oligonucleotide concentrations.** Concentrations were determined by UV spectroscopy using a *NanoDrop 2000* spectrophotometer from *Thermo Fisher Scientific*.

**Semi-preparative ion pair RP-HPLC.** Compound purification was performed on a *Shimadzu Prominence* HPLC System equipped with a  $\text{C}_{18}$  stationary phase (*Phenomenex*, Gemini, 5 µm,  $\text{C}_{18}$ , 110 Å, 100 x 4.6 mm). A gradient from 100 mM aqueous triethylammonium acetate (pH = 8.0, eluent A) to MeOH (eluent B) was used at a flow rate of 5 mL/min. Fractions containing the desired product were pooled and concentrated.

**Method:** Step gradient of 20 % to 70 % B within 13 min, then 70 % to 100 % B within 1 min followed by 100 % B for 3 min using 100 mM aqueous triethylammonium acetate (pH = 8.0, eluent A) and MeOH (eluent B) at a flow rate of 5 mL/min.

**Analytical RP-HPLC.** HPLC analysis was performed on an *Agilent 1100 series* chromatograph equipped with 1100 Quaternary Pump (*G1311A*), a 1100 Multi-Wavelength Detector (*G1365B*) and an *Agilent Eclipse Plus*  $\text{C}_{18}$  (4.6 x 100 mm, 3.5 µm) column. The conversion and purity of DNA conjugates were determined by integration of peaks recorded at 254 nm wavelength.

**Method-I:** Step gradient of 10 % to 60 % B within 10 min, then 60 % to 100 % B within 2 min followed by 100 % B for 2 min using 10 mM aqueous triethylammonium acetate (pH = 8.0, eluent A) and MeOH (eluent B) at a flow rate of 0.6 mL/min.

**Method-II:** A linear gradient of 10 % to 100 % B within 10 min followed by 100 % B for 4 min using 10 mM aqueous triethylammonium acetate (pH = 8.0, eluent A) and MeOH (eluent B) at a flow rate of 0.6 mL/min.

**MALDI-TOF.** Mass analysis was performed on a MALDI TOF/TOF MS from *Bruker Daltonics* using 2',4',6'-trihydroxyacetophenone (THAP) matrix (*Dichrom*).

## Procedures

### Amide coupling A (RP-01)

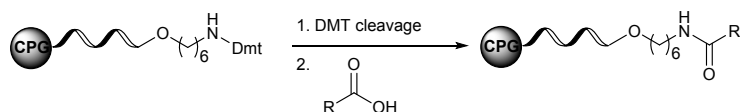

**Step 1:** The DMT-protective group of the CPG-bound oligonucleotide (250 nmol, 9-10 mg of solid phase material) was removed by addition of 200  $\mu\text{L}$  3 % trichloroacetic acid in dry  $\text{CH}_2\text{Cl}_2$  for 1 min. An orange coloring of the solution indicated successful removal of the protecting group. The deprotection was repeated 3-5 times until no coloring of the solution was observed anymore. The CPG containing deprotected DNA was washed three times with each 200  $\mu\text{L}$  of 1 % TEA in ACN, DMF, MeOH, ACN and  $\text{CH}_2\text{Cl}_2$  and then dried *in vacuo*.

#### Step 2:

The CPG-bound oligonucleotide, the acid and HATU were dried *in vacuo* for 15 min. Stock solutions of all reactants in dry DMF were prepared before the reaction was started. To the solution of the acid (25  $\mu\text{mol}$ , 100 equiv.) in 75  $\mu\text{L}$  dry DMF, HATU (25  $\mu\text{mol}$ , 100 equiv.) dissolved in 75  $\mu\text{L}$  dry DMF and DIPEA (62.5  $\mu\text{mol}$ , 250 equiv.) were added. The mixture was shaken for 5 min and added to the solid support-bound DNA suspended in 75  $\mu\text{L}$  dry DMF (250 nmol, 1 equiv.). The amide coupling reaction was shaken at ambient temperature for 2 hours. Then, the CPG-bound conjugate was filtered over a filter column and washed three times with each 200  $\mu\text{L}$  of DMF, MeOH, ACN and  $\text{CH}_2\text{Cl}_2$  and dried *in vacuo*. The amide coupling was repeated two times.

The completeness of the amide coupling was controlled by test cleavage of a small portion (0.7–0.9 mg, ~20 nmol) of the CPG-bound oligonucleotide conjugate with 500  $\mu\text{L}$  AMA (AMA = aqueous ammonia (30 %)/ aqueous methylamine (40 %), 1:1, vol/vol) for 30 min (hexT) or 4 h (ATC- and ATGC-sequences) at ambient temperature. To this solution 20  $\mu\text{L}$  of 1 M Tris-buffer (pH = 7.5) were added, the mixture was dried in a SpeedVac and re-dissolved in 200  $\mu\text{L}$  of distilled water. The crude was analyzed by analytical RP-HPLC and MALDI-MS. In case of uncompleted coupling (<90%) the reaction was repeated a third time.

Unreacted amines were capped with acetic acid anhydride (three times 200  $\mu\text{L}$ , 30 s, 1:1 mixture of THF/methylimidazole, 9:1, vol/vol, and THF/pyridine/acetic acid anhydride 8:1:1, vol/vol). The CPG-bound oligonucleotide conjugate was washed afterwards again three times with each 200  $\mu\text{L}$  of DMF, MeOH, ACN and  $\text{CH}_2\text{Cl}_2$  and dried *in vacuo*.

### Amide coupling B (RP-02)

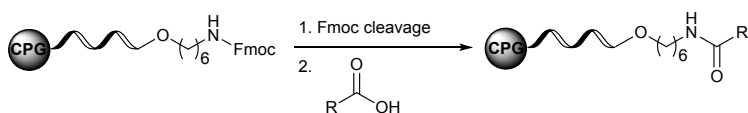

#### Step 1:

The Fmoc-protecting group of the CPG-bound oligonucleotide (250 nmol, 9-10 mg) was cleaved off by addition of 200  $\mu\text{L}$  20 % piperidine in dry DMF and shaking for 5 min. Afterwards, the CPG-bound deprotected oligonucleotide was washed three times with each 200  $\mu\text{L}$  of DMF, MeOH, ACN and  $\text{CH}_2\text{Cl}_2$  and then dried *in vacuo*.

#### Step 2:

The CPG-bound oligonucleotide, the acid and HATU were dried *in vacuo* for 15 min. Stock solutions of all reactants in dry DMF were prepared before the reaction was started. To the solution of the acid (25  $\mu\text{mol}$ , 100 equiv.) in 75  $\mu\text{L}$  dry DMF, HATU (25  $\mu\text{mol}$ , 100 equiv.) dissolved in 75  $\mu\text{L}$  dry DMF and DIPEA (62.5  $\mu\text{mol}$ , 250 equiv.) were added. The mixture was shaken for 5 min and added to the solid support-bound DNA suspended in 75  $\mu\text{L}$  dry DMF (250 nmol, 1 equiv.). The amide coupling reaction was shaken at ambient temperature for 2 hours. Then, the CPG-bound conjugate was filtered over a filter column and washed three times with each 200  $\mu\text{L}$  of DMF, MeOH, ACN and  $\text{CH}_2\text{Cl}_2$  and dried *in vacuo*. The amide coupling was repeated two times.

The completeness of the coupling reaction was controlled by test cleavage of a small portion (0.7–0.9 mg, ~20 nmol) of the CPG-bound oligonucleotide conjugate with 500  $\mu\text{L}$  AMA (AMA = aqueous ammonia (30 %)/ aqueous methylamine (40 %), 1:1, vol/vol) for 30 min (hexT) or 4 h (ATC- and ATGC-sequences) at ambient temperature. To this solution 20  $\mu\text{L}$  of 1 M Tris-buffer (pH = 7.5) were added, the mixture was dried in a SpeedVac and re-dissolved in 200  $\mu\text{L}$  of distilled water. The crude was analyzed by analytical RP-HPLC and MALDI-MS. In case of uncompleted coupling the reaction was repeated a third time.

Unreacted amines were capped with acetic acid anhydride (three times 200  $\mu\text{L}$ , 30 s, 1:1 mixture of THF/methylimidazole, 9:1, vol/vol, and THF/pyridine/acetic acid anhydride 8:1:1, vol/vol). The CPG-bound oligonucleotide conjugate was washed afterwards again three times with each 200  $\mu\text{L}$  of DMF, MeOH, ACN and  $\text{CH}_2\text{Cl}_2$  and dried *in vacuo*.

### Castagnoli-Cushman reaction on CPG-bound oligonucleotides (RP-03)

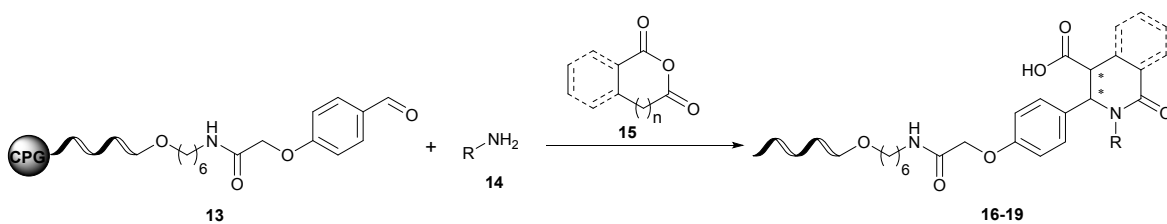

The amine **14** (10  $\mu\text{mol}$ , 500 equiv.) was dissolved in 24  $\mu\text{L}$   $\text{CH}_2\text{Cl}_2$ . The solution was added to the CPG-bound oligonucleotide-aldehyde conjugate **13** (20 nmol) suspended in 12  $\mu\text{L}$  triethyl orthoformate. The



suspension was shaken at ambient temperature for 4 h. Afterwards 30  $\mu\text{L}$  of a suspension of  $\text{Yb}(\text{OTf})_3$  (1  $\mu\text{mol}$ , 50 equiv.) in  $\text{CH}_2\text{Cl}_2$  was added, followed by 30  $\mu\text{L}$  of a suspension of anhydride **15** (10  $\mu\text{mol}$ , 500 equiv.) in  $\text{CH}_2\text{Cl}_2$ . Prior addition to the reaction vessel both suspension were vortexed and pipetted up and down to obtain homogeneous suspensions. The reaction mixture was shaken for 1 h at ambient temperature. Then the CPG-bound conjugate was filtered over a filter column and washed three times with each 200  $\mu\text{L}$  of 0.1 M EDTA solution, 0.1 M  $\text{MgCl}_2$  solution, water, DMF, MeOH, ACN and  $\text{CH}_2\text{Cl}_2$  and dried *in vacuo*. CPG-bound oligonucleotide conjugates **16-19** (**16** = hexT, **17** = 10mer ATC, **18** = 10mer ATGC and **19** = 31mer ATGC) were then cleaved from the solid support and deprotected with 500  $\mu\text{L}$  AMA solution (AMA = aqueous ammonia (30 %)/ aqueous methylamine (40 %), 1:1, vol/vol) for 30 min (hexT) or 4 h (ATC- and ATGC-sequences) at ambient temperature. To this solution 20  $\mu\text{L}$  of 1 M Tris buffer (pH = 7.5) were added, the mixture was dried in a SpeedVac and afterwards re-dissolved in 200  $\mu\text{L}$  of distilled water. The crude was analyzed by analytical RP-HPLC (Method I) and MALDI-MS. The product was purified by preparative RP-HPLC.

### 1,3-Dipolar cycloaddition on CPG-bound oligonucleotides (RP-04)

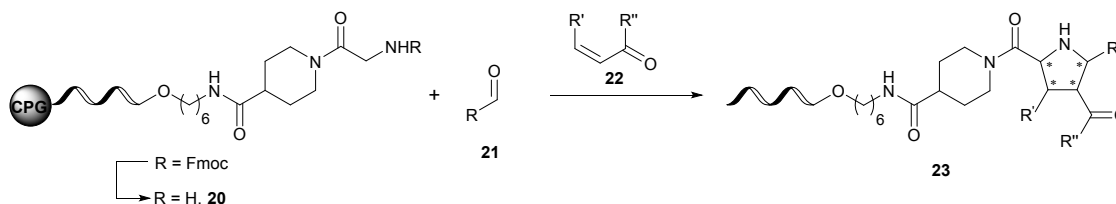

#### Step 1:

The Fmoc-protecting group of the CPG-bound oligonucleotide-glycine (**20** nmol) was removed by addition of 200  $\mu\text{L}$  20 % piperidine in dry DMF and shaking for 5 min. Afterwards, the CPG-bound deprotected oligonucleotide-glycine conjugate **20** was washed three times with each 200  $\mu\text{L}$  of DMF, MeOH, ACN and  $\text{CH}_2\text{Cl}_2$  and dried *in vacuo*.

#### Step 2:

The aldehyde **21** (20  $\mu\text{mol}$ , 1000 eq.) was either directly added to the CPG-bound DNA-glycine conjugate **20** and it was filled up to a final volume of 50  $\mu\text{L}$  with ACN/triethyl orthoformate (2:1) or the aldehyde **21** was dissolved in 50  $\mu\text{L}$  ACN/triethyl orthoformate (2:1) and then added to the DNA conjugate **20**. The reaction mixture was shaken at ambient temperature for 6 h. Afterwards, 30  $\mu\text{L}$  of a suspension of AgOAc (2  $\mu\text{mol}$ , 100 equiv.) in ACN/triethyl orthoformate (2:1) were added followed by dipolarophile **22** (80  $\mu\text{mol}$ , 4000 equiv.) and TEA (80  $\mu\text{mol}$ , 4000 equiv.). Prior addition to the reaction vessel the AgOAc suspension was vortexed and pipetted up and down to obtain a homogeneous suspension. The reaction mixture was shaken overnight at 50  $^\circ\text{C}$ . The CPG-bound conjugate was filtered over a filter column and washed three times with each 200  $\mu\text{L}$  of 0.1 M EDTA solution, DMF, MeOH, ACN and  $\text{CH}_2\text{Cl}_2$  and then dried *in vacuo*. The CPG-bound DNA conjugate **20** (**20a** = hexT, **20b** = 10mer ATC, **20c** = 10mer ATGC, **20d** = 31mer ATGC) was cleaved from the solid phase and deprotected by adding 500  $\mu\text{L}$  AMA solution and shaking for 30 min (hexT) or 4 hours (ATC- and ATGC-sequences) at ambient temperature. Afterwards 20  $\mu\text{L}$  1 M

aqueous Tris buffer (pH = 7.5) were added, the mixture was dried in a SpeedVac and the remaining DNA pellet was dissolved in 200  $\mu$ L of distilled water. To remove residual silver ions, an additional washing step using Chelex 100 resin was introduced. For this, 5 mg Chelex resin were washed three times with 10 mM aqueous triethylammonium acetate (pH = 8.0). The aqueous DNA solution was added to the resin and the suspension was shaken overnight at ambient temperature. The supernatant was taken off, dried in a SpeedVac and re-dissolved in 200  $\mu$ L distilled water. The crude was analyzed by analytical RP-HPLC (Method I) and MALDI-MS. The product was isolated by preparative RP-HPLC.

### TFA-mediated Pictet-Spengler reaction (RP-05)

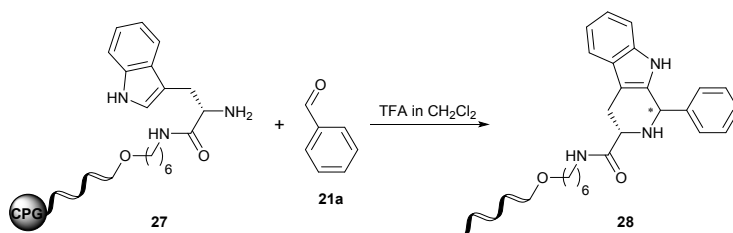

The Fmoc-protecting group of CPG-bound DNA-Trp-NHfmoc (20 nmol) was removed by treatment with 500  $\mu$ L of 20 % piperidine in DMF for 10 min at ambient temperature. The deprotected CPG-bound conjugate was filtered over a filter column and washed three times with each 200  $\mu$ L of DMF, MeOH, ACN and  $\text{CH}_2\text{Cl}_2$  and then dried *in vacuo*. Afterwards the CPG-bound DNA-Trp-NH<sub>2</sub> (20 nmol) was suspended in dry  $\text{CH}_2\text{Cl}_2$  (20  $\mu$ L). Benzaldehyde (20  $\mu$ mol, 1000 equiv.) was added followed by trifluoroacetic acid (0.5 %). The suspension was diluted with dry  $\text{CH}_2\text{Cl}_2$  to a total volume of 50  $\mu$ L and shaken at ambient temperature for 18 h. The CPG-bound conjugate was filtered over a filter column and washed three times with each 200  $\mu$ L of DMF, MeOH, ACN and  $\text{CH}_2\text{Cl}_2$  and then dried *in vacuo*. The CPG-bound DNA conjugate **27** (**27a** = hexT, **27b** = 10mer ATC, **27c** = 10mer ATGC) was cleaved off from the solid phase by adding 500  $\mu$ L AMA solution and shaking for 30 min (hexT) or 4 hours (ATC- and ATGC-sequences) at ambient temperature. Afterwards 20  $\mu$ L 1 M Tris buffer (pH = 7.5) were added, the mixture was dried in a SpeedVac and the residue was re-dissolved in 200  $\mu$ L of distilled water. The crude was analyzed by analytical RP-HPLC (Method I) and MALDI-MS. The product was isolated by preparative RP-HPLC.

### Copper(I)-catalyzed alkyne-azide cycloaddition (RP-06)

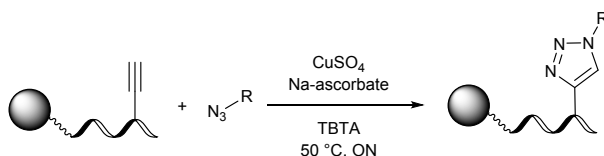

The CPG-bound oligonucleotide alkyne conjugate (50 nmol) was suspended in 100  $\mu$ L DMF and diluted with 380  $\mu$ L of  $\text{H}_2\text{O}/\text{MeOH}$  (1:1). Subsequently, the azide (125  $\mu$ mol, 2500 equiv.) dissolved in 100  $\mu$ L of  $\text{DMF}/\text{H}_2\text{O}$  (9:1), TBTA (6.25  $\mu$ mol, 125 equiv.) dissolved in 20  $\mu$ L of DMF, Na-ascorbate (6.25  $\mu$ mol, 125 equiv.) dissolved in 10  $\mu$ L of  $\text{H}_2\text{O}$ , and  $\text{CuSO}_4 \cdot 5\text{H}_2\text{O}$  (0.625  $\mu$ mol, 12.5 equiv.) dissolved in 10  $\mu$ L of

H<sub>2</sub>O were added to the suspension in this order. Stock solutions of all reactants were prepared before the reaction was started. The reaction mixtures were shaken at 50 °C overnight. Then the CPG-bound conjugate was filtered over a filter column and washed three times with each 200 µL of 0.1 M EDTA solution, 0.1 M MgCl<sub>2</sub> solution, water, DMF, MeOH, ACN and CH<sub>2</sub>Cl<sub>2</sub> and dried *in vacuo*.

The completeness of the reaction was controlled by cleavage of a small portion (~20 nmol) of CPG-bound oligonucleotide conjugate with 500 µL AMA (AMA = aqueous ammonia (30 %)/ aqueous methylamine (40 %), 1:1, vol/vol) for 4 h at ambient temperature. To this solution 20 µL of 1 M Tris buffer (pH = 7.5) were added, the mixture was dried in a SpeedVac, re-dissolved in 200 µL of distilled water. The crude was analyzed by analytical RP-HPLC (Method II) and MALDI-MS.

## Yb(OTf)<sub>3</sub>-mediated Castagnoli-Cushman reaction on CPG-bound oligonucleotides

**Table S1** Optimization of Yb(OTf)<sub>3</sub>-mediated Castagnoli-Cushman reaction on CPG-bound hexT.<sup>a</sup>

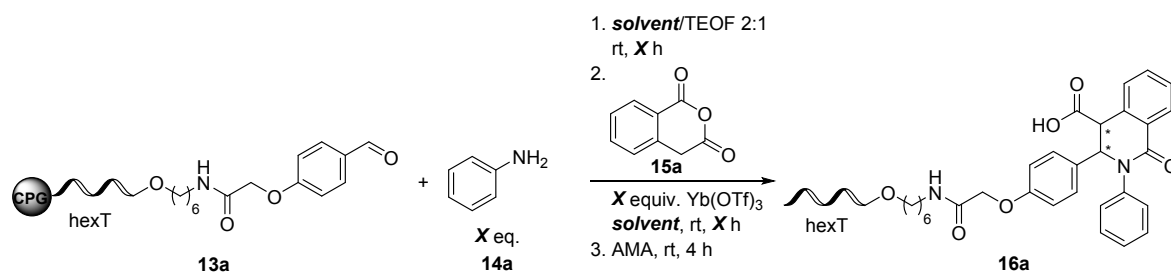

| Entry | Reaction conditions <sup>b</sup>                                                                                                                                                                                                                                                                       | HPLC trace of crude reaction mixture <sup>c</sup> |
|-------|--------------------------------------------------------------------------------------------------------------------------------------------------------------------------------------------------------------------------------------------------------------------------------------------------------|---------------------------------------------------|
| 1     | hexT-aldehyde conjugate <b>13a</b>                                                                                                                                                                                                                                                                     |                                                   |
| 2     | hexT-isoquinolone conjugate <b>16a</b>                                                                                                                                                                                                                                                                 |                                                   |
| 3     | 1. 500 equiv. <b>14a</b><br>CH <sub>2</sub> Cl <sub>2</sub> /TEOF (2:1), 4 h, rt<br>2. <b>washing step (3x 200 μL DMF, MeOH, MeCN, CH<sub>2</sub>Cl<sub>2</sub>)</b><br>3. 500 equiv. <b>15a</b><br>100 equiv. Yb(OTf) <sub>3</sub><br>CH <sub>2</sub> Cl <sub>2</sub> , 2 h, rt<br>=> conversion <5 % |                                                   |
| 4     | 1. 500 equiv. <b>14a</b><br>CH <sub>2</sub> Cl <sub>2</sub> /TEOF (2:1), 4 h, rt<br>2. 500 equiv. <b>15a</b><br>100 equiv. Yb(OTf) <sub>3</sub><br>CH <sub>2</sub> Cl <sub>2</sub> , <b>2 h</b> , rt<br>=> conversion 72 %                                                                             |                                                   |

- 5
1. 500 equiv. **14a**  
CH<sub>2</sub>Cl<sub>2</sub>/TEOF (2:1), 4 h, rt
  2. 500 equiv. **15a**  
100 equiv. Yb(OTf)<sub>3</sub>  
CH<sub>2</sub>Cl<sub>2</sub>, **1 h**, rt
- => conversion 73 %

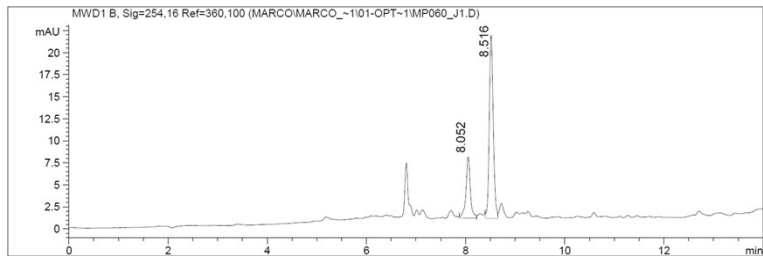

- 6
1. 500 equiv. **14a**  
CH<sub>2</sub>Cl<sub>2</sub>/TEOF (2:1), 4 h, rt
  2. 500 equiv. **15a**  
100 equiv. Yb(OTf)<sub>3</sub>  
CH<sub>2</sub>Cl<sub>2</sub>, **0.5 h**, rt
- => conversion 68 %

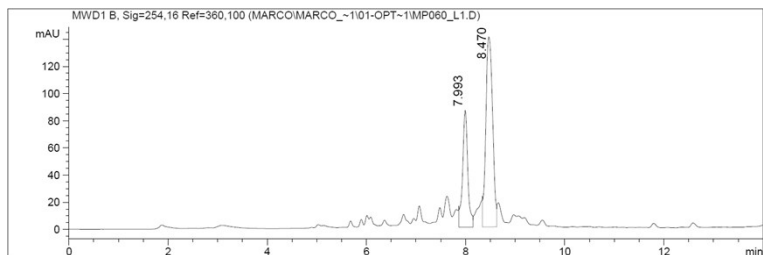

- 7
1. 500 equiv. **14a**  
CH<sub>2</sub>Cl<sub>2</sub>/TEOF (2:1), **3 h**, rt
  2. 500 equiv. **15a**  
100 equiv. Yb(OTf)<sub>3</sub>  
CH<sub>2</sub>Cl<sub>2</sub>, 1 h, rt
- => conversion 69 %

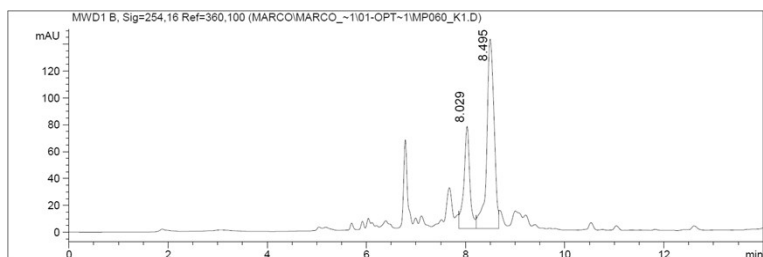

- 8
1. 500 equiv. **14a**  
CH<sub>2</sub>Cl<sub>2</sub>/TEOF (2:1), **2 h**, rt
  2. 500 equiv. **15a**  
100 equiv. Yb(OTf)<sub>3</sub>  
CH<sub>2</sub>Cl<sub>2</sub>, 1 h, rt
- => conversion 68 %

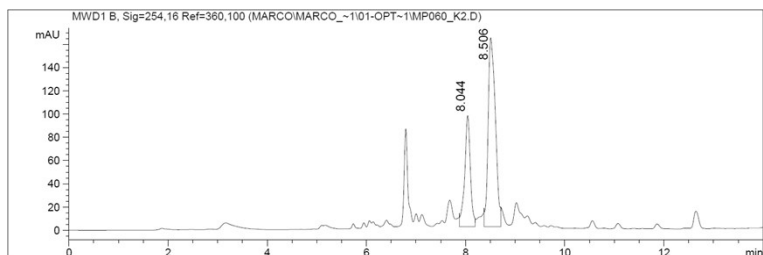

- 9
1. 500 equiv. **14a**  
CH<sub>2</sub>Cl<sub>2</sub>/TEOF (2:1), **1 h**, rt
  2. 500 equiv. **15a**  
100 equiv. Yb(OTf)<sub>3</sub>  
CH<sub>2</sub>Cl<sub>2</sub>, 1 h, rt
- => conversion 65 %

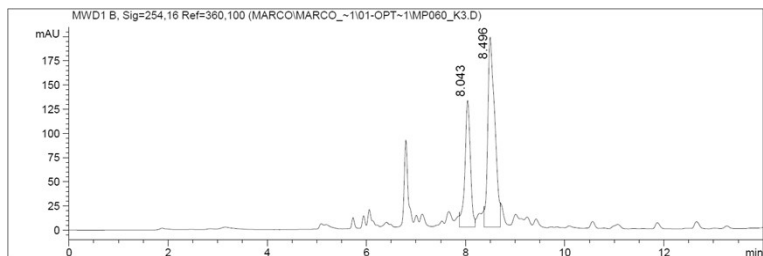

- 10
1. 500 equiv. **14a**  
CH<sub>2</sub>Cl<sub>2</sub>/TEOF (2:1), **16 h**, rt
  2. 500 equiv. **15a**  
100 equiv. Yb(OTf)<sub>3</sub>  
CH<sub>2</sub>Cl<sub>2</sub>, 1 h, rt
- => conversion 73 %

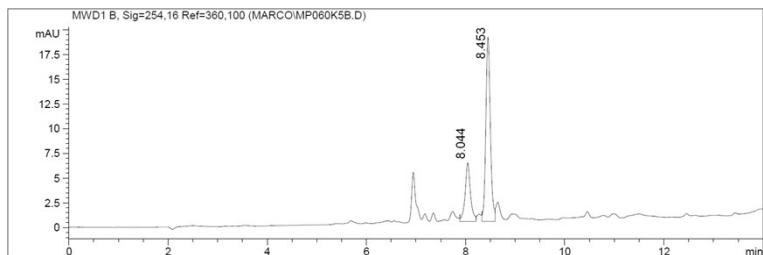

- 11
- 500 equiv. **14a**  
CH<sub>2</sub>Cl<sub>2</sub>, 4 h, rt  
**step without TEOF**
  - 500 equiv. **15a**  
100 equiv. Yb(OTf)<sub>3</sub>  
CH<sub>2</sub>Cl<sub>2</sub>, 1 h, rt
- => conversion 7 %

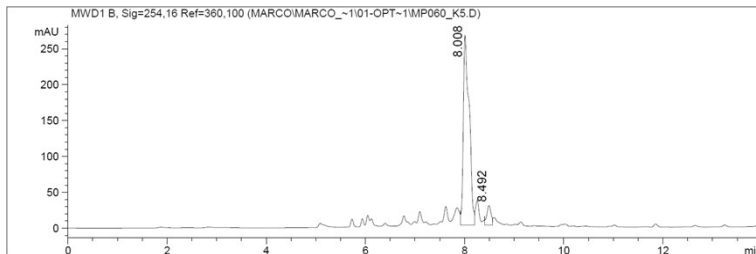

- 12
- 500 equiv. **14a**  
CH<sub>2</sub>Cl<sub>2</sub>/TEOF (2:1), 4 h, rt
  - 500 equiv. **15a**  
**50 equiv.** Yb(OTf)<sub>3</sub>  
CH<sub>2</sub>Cl<sub>2</sub>, 1 h, rt
- => conversion 70 %

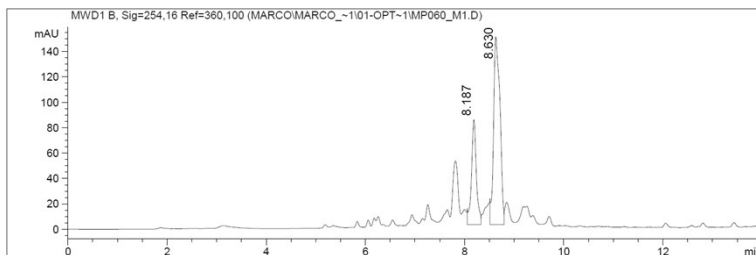

- 13
- 500 equiv. **14a**  
CH<sub>2</sub>Cl<sub>2</sub>/TEOF (2:1), 4 h, rt
  - 500 equiv. **15a**  
**25 equiv.** Yb(OTf)<sub>3</sub>  
CH<sub>2</sub>Cl<sub>2</sub>, 1 h, rt
- => conversion 54 %

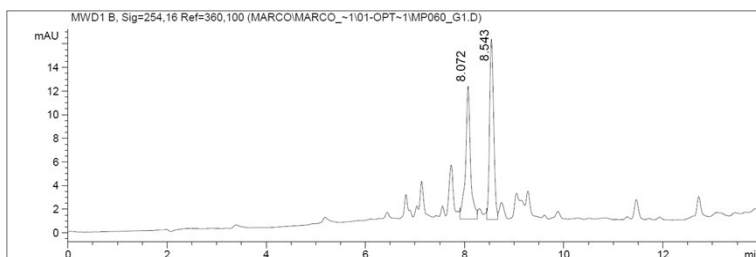

- 14
- 500 equiv. **14a**  
CH<sub>2</sub>Cl<sub>2</sub>/TEOF (2:1), 4 h, rt
  - 500 equiv. **15a**  
**0 equiv.** Yb(OTf)<sub>3</sub>  
CH<sub>2</sub>Cl<sub>2</sub>, 1 h, rt
- => conversion 38 %

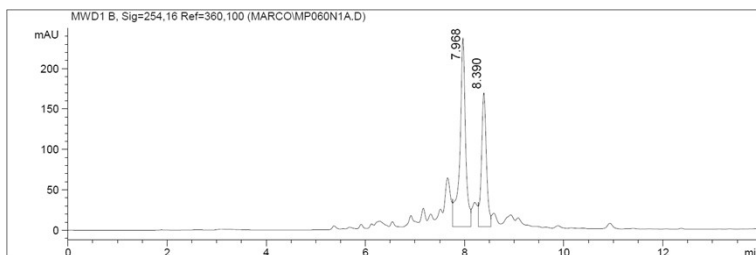

- 15
- 1000 equiv.** **14a**  
CH<sub>2</sub>Cl<sub>2</sub>/TEOF (2:1), 4 h, rt
  - 1000 equiv.** **15a**  
50 equiv. Yb(OTf)<sub>3</sub>  
CH<sub>2</sub>Cl<sub>2</sub>, 1 h, rt
- => conversion 65 %

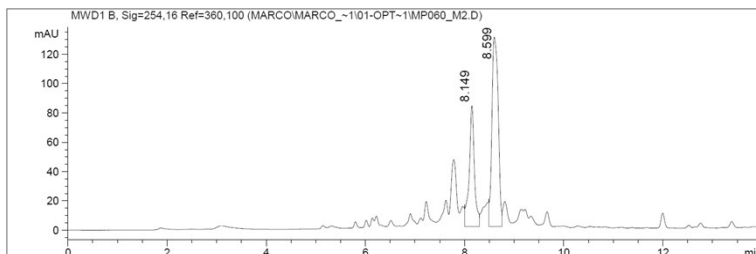

- 16
- 1500 equiv.** **14a**  
CH<sub>2</sub>Cl<sub>2</sub>/TEOF (2:1), 4 h, rt
  - 1500 equiv.** **15a**  
50 equiv. Yb(OTf)<sub>3</sub>  
CH<sub>2</sub>Cl<sub>2</sub>, 1 h, rt
- => conversion 63 %

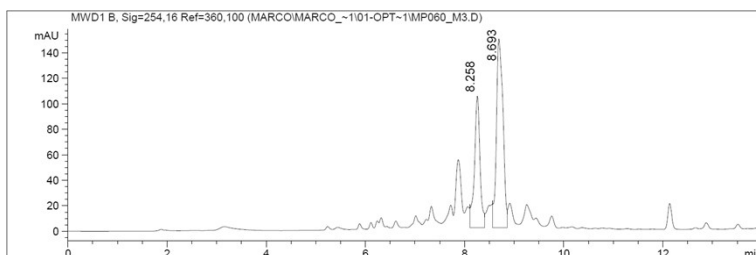

- 17
1. **2000 equiv. 14a**  
CH<sub>2</sub>Cl<sub>2</sub>/TEOF (2:1), 4 h, rt
  2. **2000 equiv. 15a**  
50 equiv. Yb(OTf)<sub>3</sub>  
CH<sub>2</sub>Cl<sub>2</sub>, 1 h, rt
- => conversion 51 %

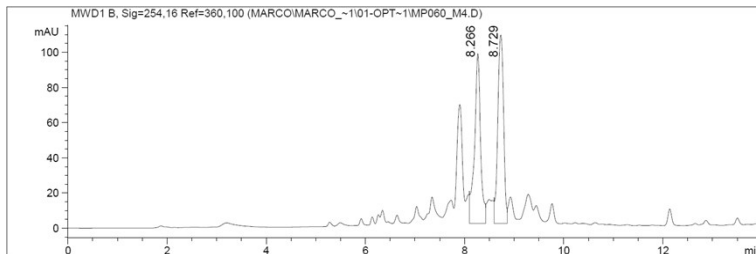

- 18
1. 500 equiv. **14a**  
THF/TEOF (2:1), 4 h, rt
  2. 500 equiv. **15a**  
50 equiv. Yb(OTf)<sub>3</sub>  
THF, 1 h, rt
- => conversion 56 %

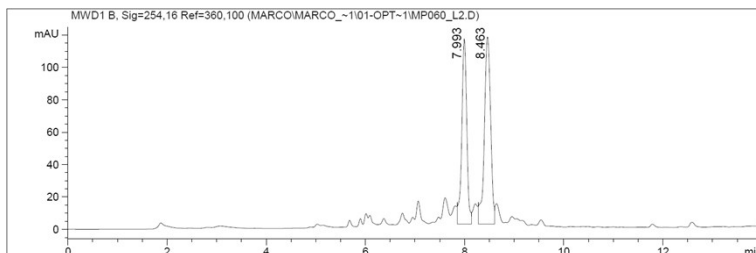

- 19
1. 500 equiv. **14a**  
DCE/TEOF (2:1), 4 h, rt
  2. 500 equiv. **15a**  
50 equiv. Yb(OTf)<sub>3</sub>  
DCE, 1 h, rt
- => conversion 58 %

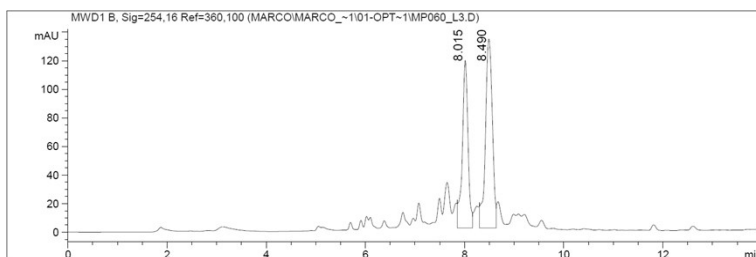

- 20
1. 500 equiv. **14a**  
MeCN/TEOF (2:1), 4 h, rt
  2. 500 equiv. **15a**  
50 equiv. Yb(OTf)<sub>3</sub>  
MeCN, 1 h, rt
- => conversion 52 %

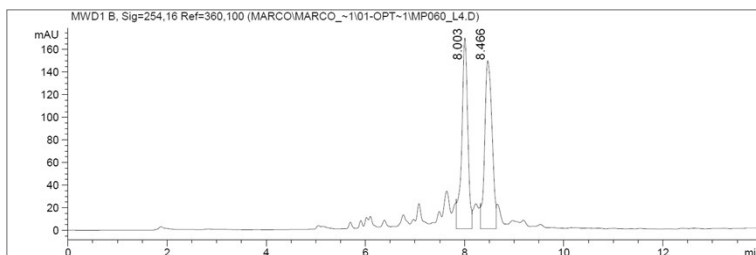

- 21
1. 500 equiv. **14a**  
MeOH/TEOF (2:1), 4 h, rt
  2. 500 equiv. **15a**  
50 equiv. Yb(OTf)<sub>3</sub>  
MeOH, 1 h, rt
- => conversion 68 %

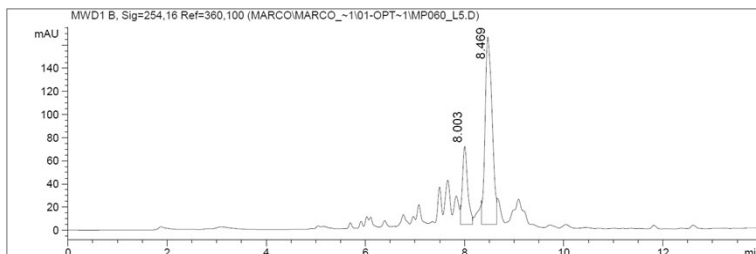

- 22
1. 500 equiv. **14a**  
toluene/TEOF (2:1), 4 h, rt
  2. 500 equiv. **15a**  
50 equiv. Yb(OTf)<sub>3</sub>  
toluene, 1 h, rt
- => conversion 50 %

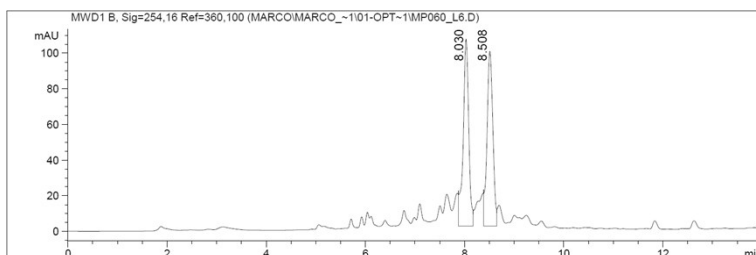

- 23
- 500 equiv. **14a**  
**1,4-dioxane**/TEOF (2:1), 4 h, rt
  - 500 equiv. **15a**  
50 equiv. Yb(OTf)<sub>3</sub>  
**1,4-dioxane**, 1 h, rt
- => conversion 52 %

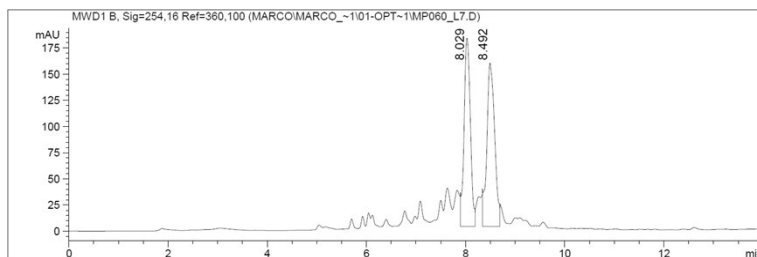

- 24
- 500 equiv. **14a**  
**DMF**/TEOF (2:1), 4 h, rt
  - 500 equiv. **15a**  
50 equiv. Yb(OTf)<sub>3</sub>  
**DMF**, 1 h, rt
- => conversion 31 %

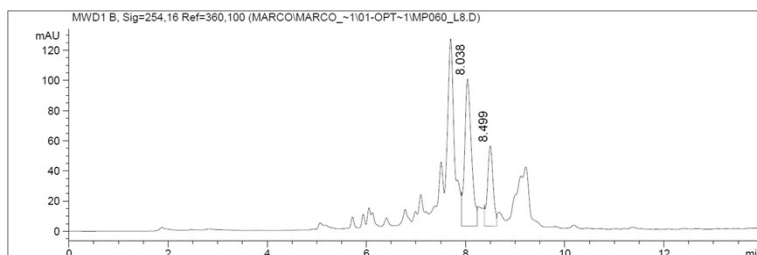

- 25
- 500 equiv. **14a**  
**EtOAc**/TEOF (2:1), 4 h, rt
  - 500 equiv. **15a**  
50 equiv. Yb(OTf)<sub>3</sub>  
**EtOAc**, 1 h, rt
- => conversion 40 %

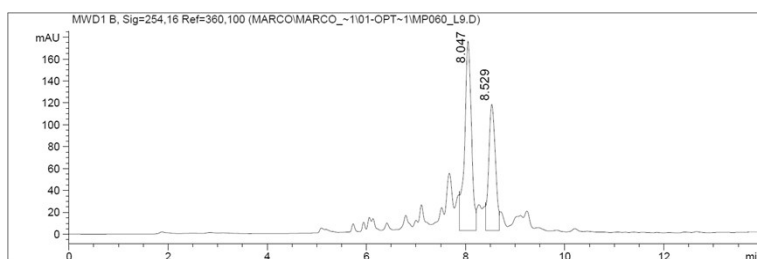

<sup>a</sup> CPG-bound hexT conjugate **13a** (20 nmol) and aniline **14a** (X equiv.) were condensed in 36  $\mu$ L of indicated solvent/triethyl orthoformate (2:1) at ambient temperature, then Yb(OTf)<sub>3</sub> (X equiv.) and anhydride **15a** (X equiv.) each suspended in 30  $\mu$ L of indicated solvent were added, the reaction mixture was shaken at ambient temperature. <sup>b</sup> parameters that were changed are in bold and italic. <sup>c</sup> Analytical RP-HPLC, Method-I. TEOF = triethyl orthoformate.



**Table S2** – Scope of Yb(OTf)<sub>3</sub>-mediated Castagnoli-Cushman reaction on CPG-bound oligonucleotides using different amines and anhydrides.<sup>a</sup>

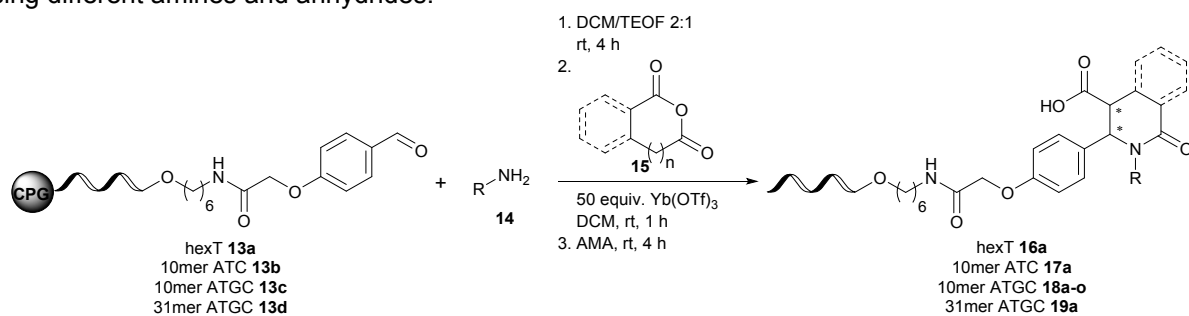

| Entry | Product    | Amine          | Anhydride      | Conversion [%] <sup>b</sup> | Yield [nmol] <sup>c</sup> | Mass <sub>calc.</sub><br>Mass <sub>found</sub> <sup>d</sup> |
|-------|------------|----------------|----------------|-----------------------------|---------------------------|-------------------------------------------------------------|
| 1     | <b>16a</b> | <br><b>14a</b> | <br><b>15a</b> | 70                          | 4.9                       | 2341.8<br>2342.3                                            |
| 2     | <b>17a</b> | <br><b>14a</b> | <br><b>15a</b> | 68                          | 5.3                       | 3540.6<br>3539.8                                            |
| 3     | <b>18a</b> | <br><b>14a</b> | <br><b>15a</b> | 69                          | 4.7                       | 3596.6<br>3596.1                                            |
| 4     | <b>19a</b> | <br><b>14a</b> | <br><b>15a</b> | 63 <sup>e</sup>             | ---                       | 9953.5<br>9942.6                                            |
| 5     | <b>18b</b> | <br><b>14b</b> | <br><b>15a</b> | <5                          | ---                       | 3675.5<br>n.d.                                              |
| 6     | <b>18c</b> | <br><b>14c</b> | <br><b>15a</b> | 52                          | 1.6                       | 3675.5<br>3674.6                                            |
| 7     | <b>18d</b> | <br><b>14d</b> | <br><b>15a</b> | 46                          | 2.5                       | 3656.6<br>3654.1                                            |
| 8     | <b>18e</b> | <br><b>14e</b> | <br><b>15a</b> | 65                          | 5.3                       | 3624.6<br>3622.1                                            |
| 9     | <b>18f</b> | <br><b>14f</b> | <br><b>15a</b> | 72                          | 4.6                       | 3638.7<br>3640.0                                            |

|    |            |                                                                                     |                                                                                     |      |     |                  |
|----|------------|-------------------------------------------------------------------------------------|-------------------------------------------------------------------------------------|------|-----|------------------|
| 10 | <b>18g</b> | 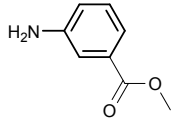   |    | 54   | 5.1 | 3654.6<br>3655.3 |
|    |            | <b>14g</b>                                                                          | <b>15a</b>                                                                          |      |     |                  |
| 11 | <b>18h</b> |    |    | 50   | 2.8 | 3620.6<br>3619.7 |
|    |            | <b>14h</b>                                                                          | <b>15a</b>                                                                          |      |     |                  |
| 12 | <b>18i</b> |    |    | 89   | 5.2 | 3562.6<br>3564.3 |
|    |            | <b>14i</b>                                                                          | <b>15a</b>                                                                          |      |     |                  |
| 13 | <b>18j</b> |    |    | 62   | 3.9 | 3610.6<br>3609.1 |
|    |            | <b>14j</b>                                                                          | <b>15a</b>                                                                          |      |     |                  |
| 14 | <b>18k</b> |    |    | 74   | 5.0 | 3736.5<br>3734.8 |
|    |            | <b>14k</b>                                                                          | <b>15a</b>                                                                          |      |     |                  |
| 15 | <b>18l</b> |   |   | 83   | 5.7 | 3640.6<br>3639.1 |
|    |            | <b>14l</b>                                                                          | <b>15a</b>                                                                          |      |     |                  |
| 16 | <b>18m</b> |  |  | 78   | 3.8 | 3663.7<br>3661.8 |
|    |            | <b>14m</b>                                                                          | <b>15a</b>                                                                          |      |     |                  |
| 17 | <b>18n</b> |  |  | n.d. | --- | 3548.5<br>n.d.   |
|    |            | <b>14i</b>                                                                          | <b>15b</b>                                                                          |      |     |                  |
| 18 | <b>18o</b> |  |  | n.d. | --- | 3520.5<br>n.d.   |
|    |            | <b>14i</b>                                                                          | <b>15c</b>                                                                          |      |     |                  |

<sup>a</sup> CPG-bound oligonucleotide conjugate **13** (20 nmol) and amine **14** (500 equiv., 10  $\mu$ mol) were condensed in 36  $\mu$ L  $\text{CH}_2\text{Cl}_2$ /triethyl orthoformate (2:1) at ambient temperature for 4 h, then addition of  $\text{Yb}(\text{OTf})_3$  (50 equiv., 1  $\mu$ mol) and anhydride **15** (500 equiv., 10  $\mu$ mol) each suspended in 30  $\mu$ L  $\text{CH}_2\text{Cl}_2$  at ambient temperature for 1 h. DNA cleavage with AMA (30 % aqueous ammonia/ 40 % aqueous methylamine, 1:1 (vol/vol)) at ambient temperature for 4 h. <sup>b</sup> Determined by analytical RP-HPLC analysis. <sup>c</sup> Determined by NanoDrop. <sup>d</sup> Measured by MALDI-MS. <sup>e</sup> Determined by analysis of preparative RP-HPLC chromatogram. 10mer ATC = 5'-TTA CTA CCT A-3', 10mer ATGC = 5'-GTC ATG ATC T-3', 31mer ATGC = 5'-CAA ATC CGT TCA CAC CGA CCT GTC ATG ATC T-3'. n.d. = not detected.

## Starting materials for Castagnoli-Cushman reaction on CPG-bound oligonucleotides

**DNA conjugate 13a:** Following DMT removal, CPG-bound hexT-C<sub>6</sub>-NH<sub>2</sub> was reacted with 2-(4-formylphenoxy)acetic acid according to RP-01.

### HPLC trace of crude reaction mixture 13a (Analytical RP-HPLC, Method-I)

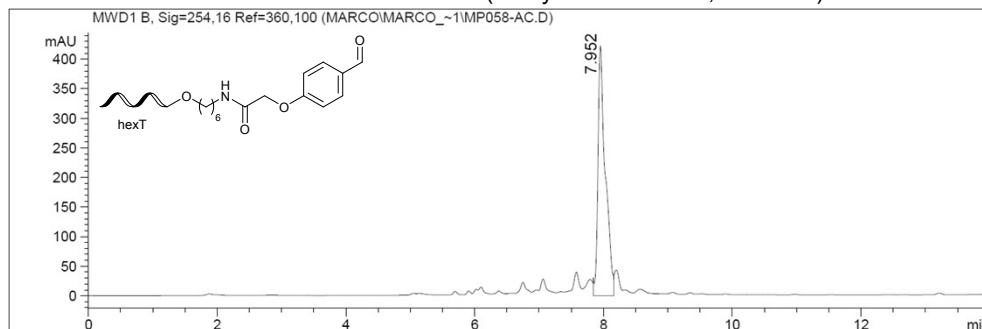

Peak list:

| Ret. Time | Width min | Height  | Area     | Area %  |
|-----------|-----------|---------|----------|---------|
| 7.952     | 0.113     | 422.406 | 3381.665 | 100.000 |

### MALDI-MS spectrum of crude reaction mixture 13a

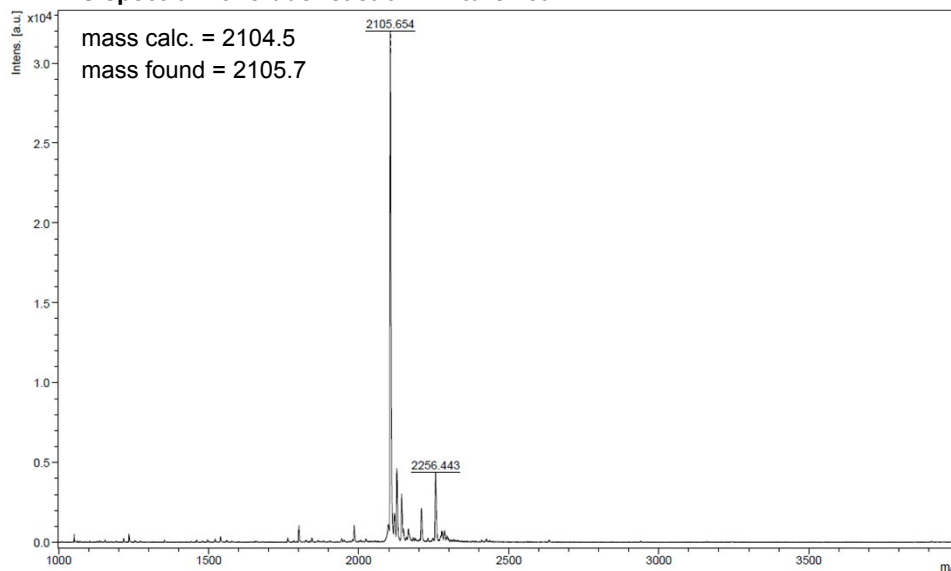

**DNA conjugate 13b:** Following DMT removal, CPG-bound ATC-C<sub>6</sub>-NH<sub>2</sub> was reacted with 2-(4-formylphenoxy)acetic acid according to RP-01.

**HPLC trace of crude reaction mixture 13b (Analytical RP-HPLC, Method-I)**

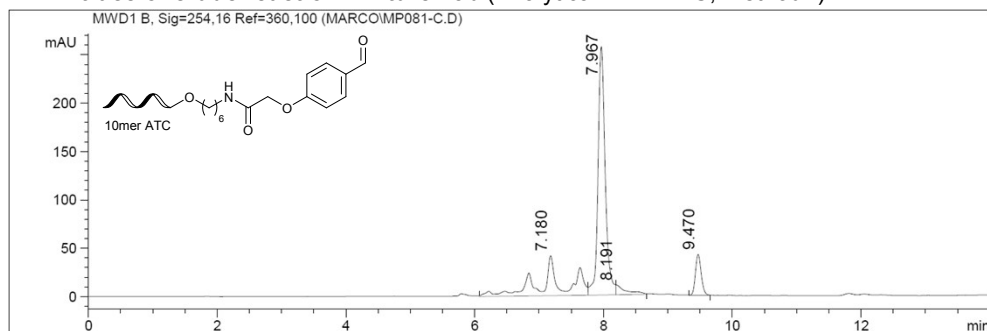

Peak list:

| Ret. Time | Width min | Height  | Area     | Area % |
|-----------|-----------|---------|----------|--------|
| 7.180     | 0.379     | 41.251  | 938.027  | 28.436 |
| 7.967     | 0.129     | 257.082 | 1987.073 | 60.237 |
| 8.191     | 0.181     | 10.391  | 112.757  | 3.418  |
| 9.470     | 0.103     | 42.417  | 260.912  | 7.909  |

**MALDI-MS spectrum of isolated product 13b**

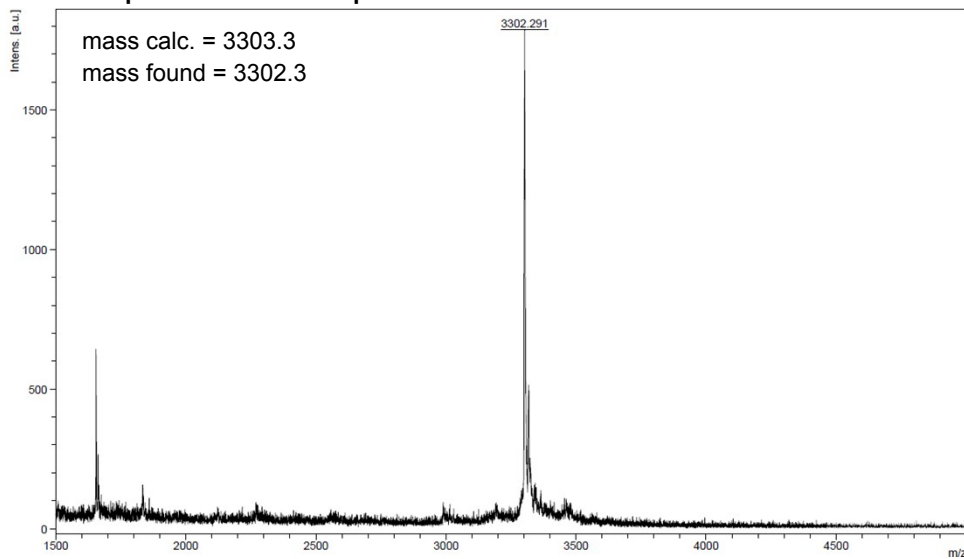

**DNA conjugate 13c:** Following DMT removal, CPG-bound ATGC-C<sub>6</sub>-NH<sub>2</sub> was reacted with 2-(4-formylphenoxy)acetic acid according to RP-01.

**HPLC trace of crude reaction mixture 13c (Analytical RP-HPLC, Method-I)**

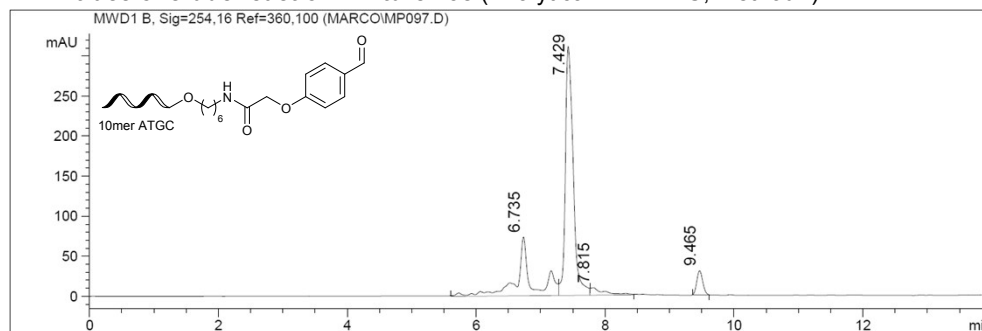

Peak list:

| Ret. Time | Width min | Height  | Area     | Area % |
|-----------|-----------|---------|----------|--------|
| 6.735     | 0.266     | 73.641  | 1173.848 | 28.178 |
| 7.429     | 0.142     | 311.345 | 2652.366 | 63.670 |
| 7.815     | 0.249     | 9.363   | 139.647  | 3.352  |
| 9.465     | 0.108     | 30.728  | 199.962  | 4.800  |

**MALDI-MS spectrum of isolated product 13c**

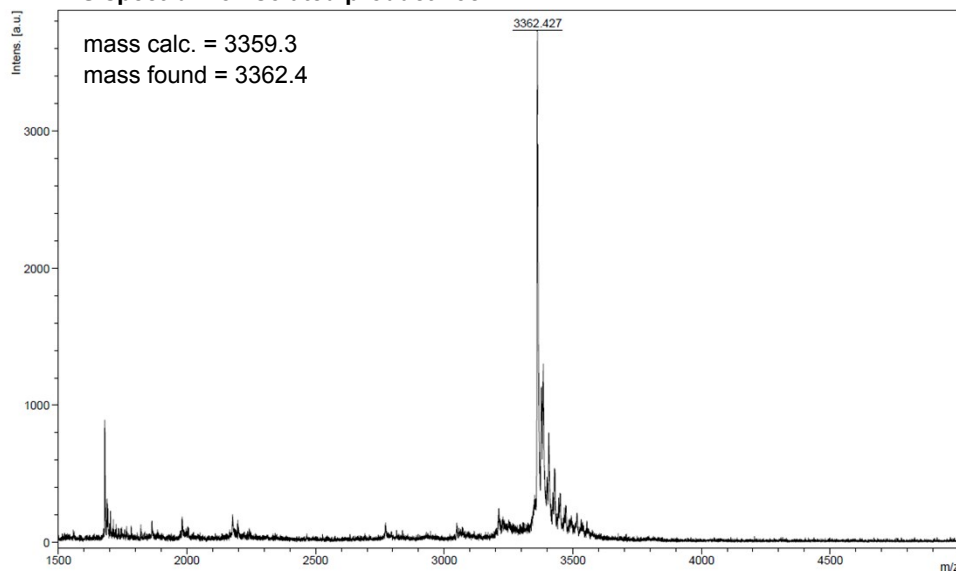

**DNA conjugate 13d:** Following DMT removal, CPG-bound ATGC-C<sub>6</sub>-NH<sub>2</sub> was reacted with 2-(4-formylphenoxy)acetic acid according to RP-01.

**HPLC trace of crude reaction mixture 13d (Analytical RP-HPLC, Method-II)**

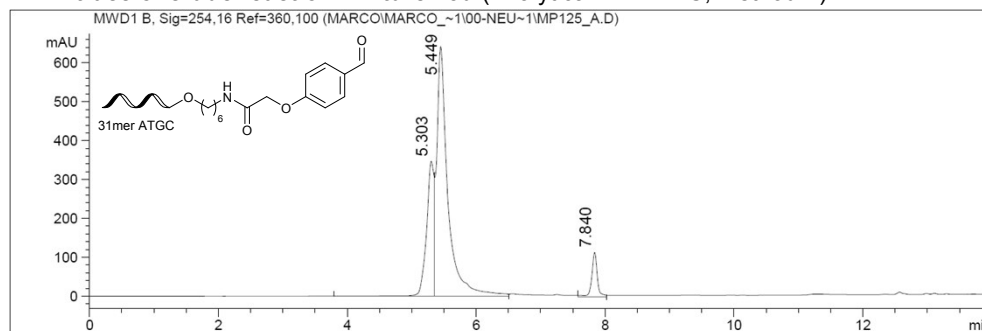

Peak list:

| Ret. Time | Width min | Height  | Area     | Area % |
|-----------|-----------|---------|----------|--------|
| 5.303     | 0.117     | 346.872 | 2818.422 | 25.313 |
| 5.449     | 0.167     | 642.035 | 7635.373 | 68.574 |
| 7.840     | 0.099     | 114.803 | 680.658  | 6.113  |

**MALDI-MS spectrum of isolated product 13d**

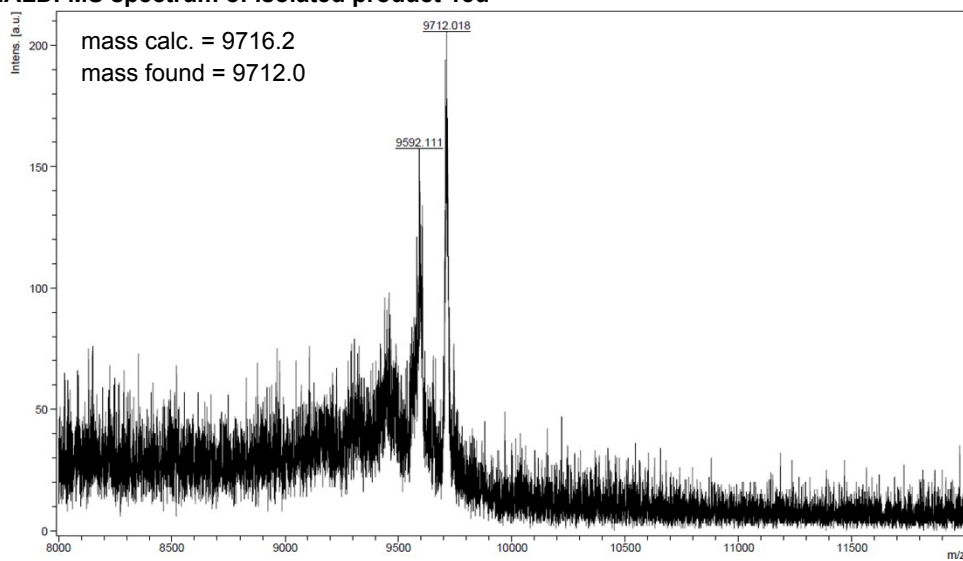

## Products of Castagnoli-Cushman reaction on CPG-bound oligonucleotides

**DNA conjugate 16a:** CPG-bound hexT-aldehyde conjugate **13a** was reacted with aniline **14a** and homophthalic anhydride **15a** according to RP-03.

### HPLC trace of crude reaction mixture 16a (Analytical RP-HPLC, Method-I)

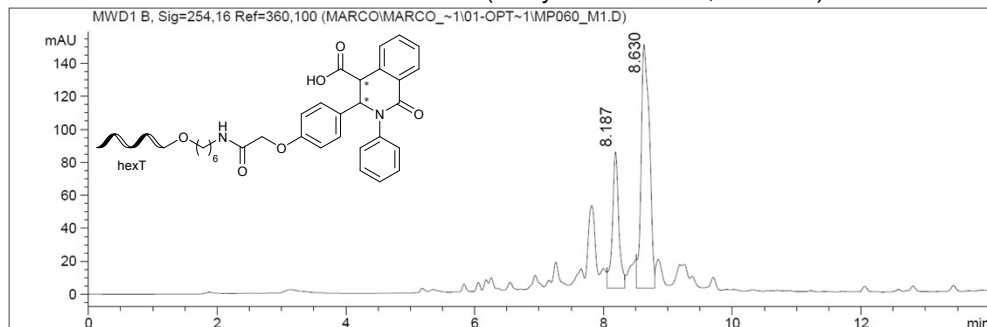

Peak list:

| Ret. Time | Width min | Height  | Area     | Area % |
|-----------|-----------|---------|----------|--------|
| 8.187     | 0.113     | 82.678  | 560.013  | 29.804 |
| 8.630     | 0.149     | 147.883 | 1318.988 | 70.196 |

### HPLC trace of isolated product 16a (Analytical RP-HPLC, Method-I)

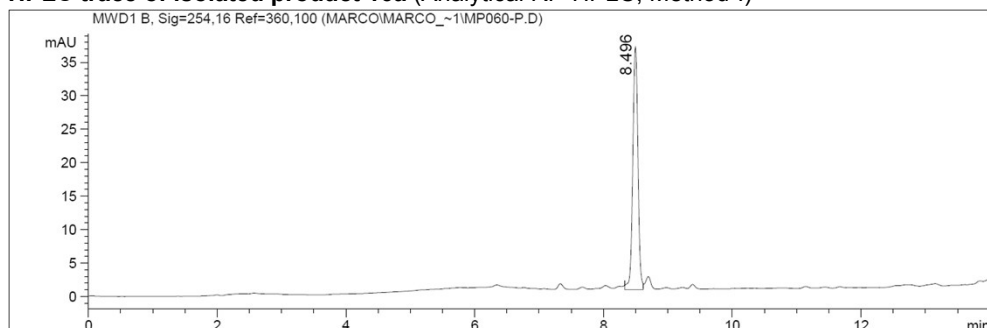

Peak list:

| Ret. Time | Width min | Height | Area    | Area %  |
|-----------|-----------|--------|---------|---------|
| 8.496     | 0.092     | 36.476 | 201.526 | 100.000 |

### MALDI-MS spectrum of isolated product 16a

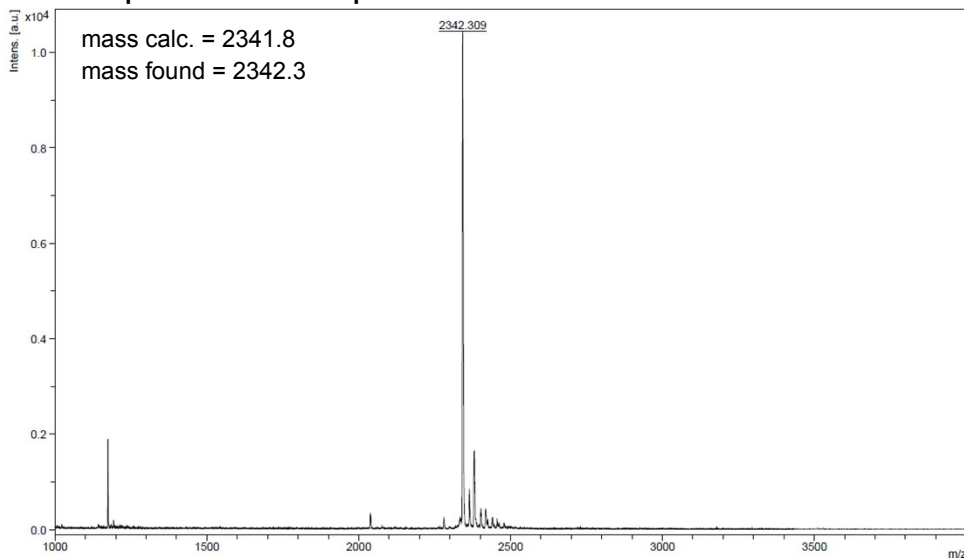

**DNA conjugate 17a:** CPG-bound 10mer ATC-aldehyde conjugate **13b** was reacted with aniline **14a** and homophthalic anhydride **15a** according to RP-03.

#### HPLC trace of crude reaction mixture 17a (Analytical RP-HPLC, Method-I)

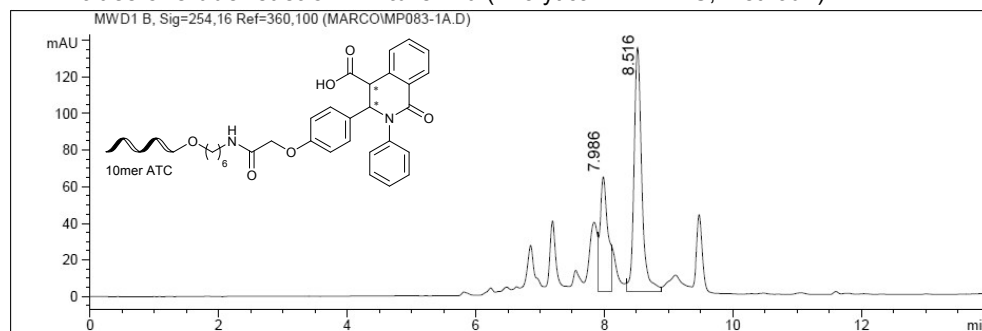

Peak list:

| Ret. Time | Width min | Height  | Area     | Area % |
|-----------|-----------|---------|----------|--------|
| 7.986     | 0.140     | 62.787  | 526.326  | 32.230 |
| 8.516     | 0.138     | 133.548 | 1106.728 | 67.770 |

#### HPLC trace of isolated product 17a (Analytical RP-HPLC, Method-I)

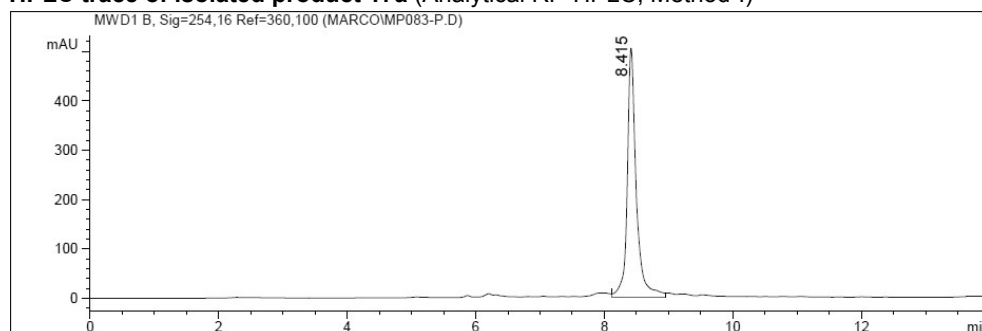

Peak list:

| Ret. Time | Width min | Height  | Area     | Area %  |
|-----------|-----------|---------|----------|---------|
| 8.415     | 0.140     | 506.541 | 4965.755 | 100.000 |

#### MALDI-MS spectrum of isolated product 17a

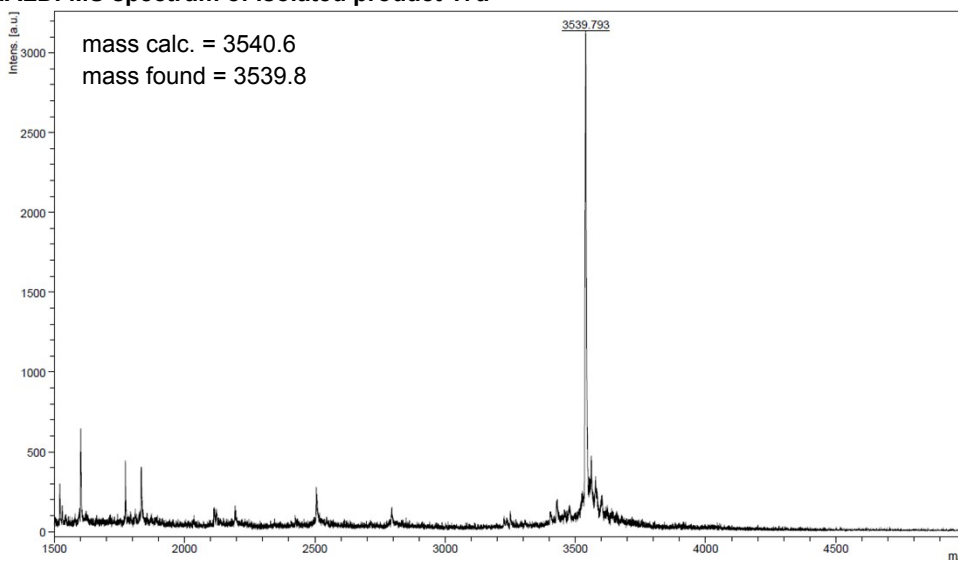



**DNA conjugate 18a:** CPG-bound 10mer ATGC-aldehyde conjugate **13c** was reacted with aniline **14a** and homophthalic anhydride **15a** according to RP-03.

**HPLC trace of crude reaction mixture 18a (Analytical RP-HPLC, Method-I)**

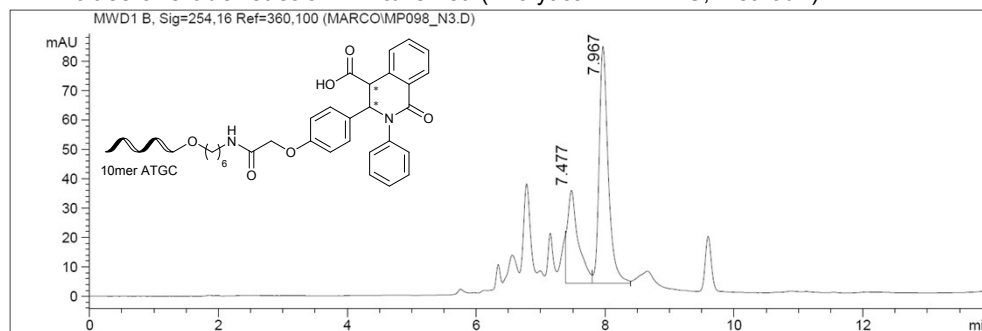

Peak list:

| Ret. Time | Width min | Height | Area    | Area % |
|-----------|-----------|--------|---------|--------|
| 7.477     | 0.196     | 31.684 | 372.399 | 32.195 |
| 7.967     | 0.162     | 80.722 | 784.286 | 67.805 |

**HPLC trace of isolated product 18a (Analytical RP-HPLC, Method-I)**

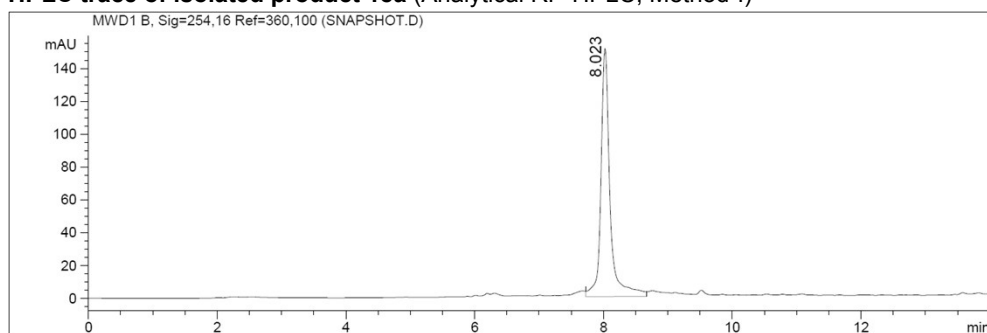

Peak list:

| Ret. Time | Width min | Height  | Area     | Area %  |
|-----------|-----------|---------|----------|---------|
| 8.023     | 0.144     | 151.055 | 1476.153 | 100.000 |

**MALDI-MS spectrum of isolated product 18a**

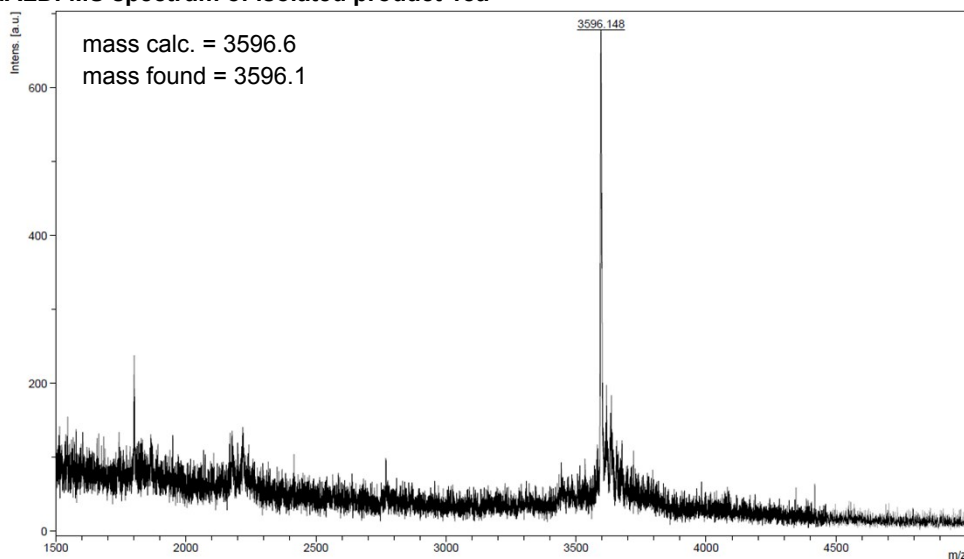

**DNA conjugate 19a:** CPG-bound 31mer ATC-aldehyde conjugate **13d** was reacted with aniline **14a** and homophthalic anhydride **15a** according to RP-03.

**HPLC trace of crude reaction mixture 19a (Analytical RP-HPLC, Method-II)**

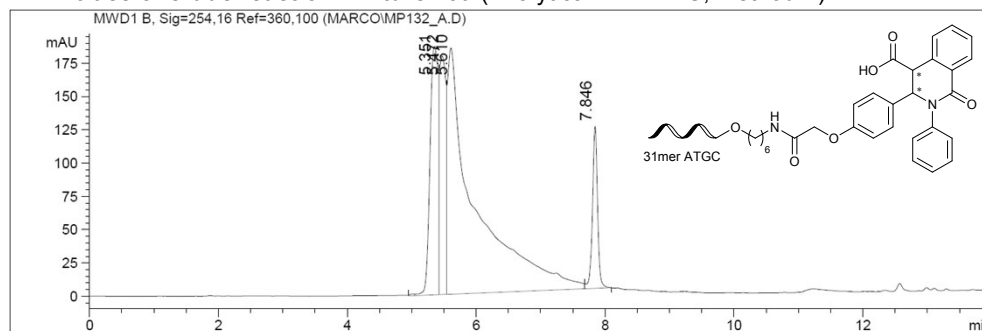

Peak list:

| Ret. Time | Width min | Height  | Area     | Area % |
|-----------|-----------|---------|----------|--------|
| 5.351     | 0.149     | 186.595 | 1665.541 | 18.264 |
| 5.472     | 0.116     | 179.091 | 1242.943 | 13.630 |
| 5.610     | 0.500     | 184.914 | 5543.173 | 60.787 |
| 7.846     | 0.091     | 122.275 | 667.405  | 7.319  |

**HPLC trace of crude reaction mixture 19a (Preparative RP-HPLC)**

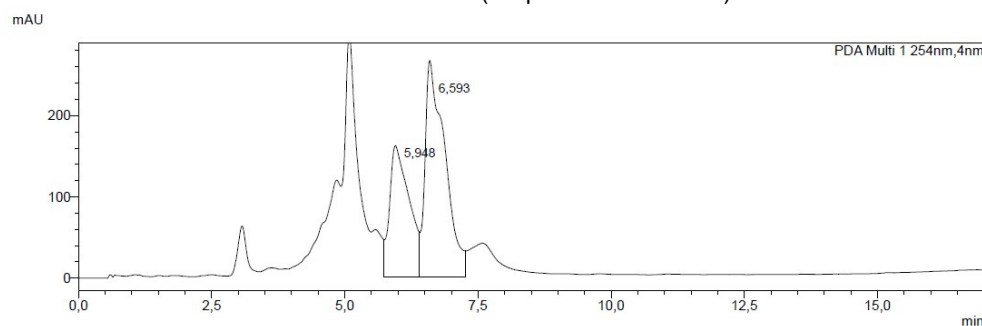

Peak Table

| Peak# | Ret. Time | Area     | Area%   |
|-------|-----------|----------|---------|
| 1     | 5.948     | 4140713  | 37.471  |
| 2     | 6.593     | 6909770  | 62.529  |
| Total |           | 11050482 | 100.000 |

**MALDI-MS of crude reaction mixture 19a**

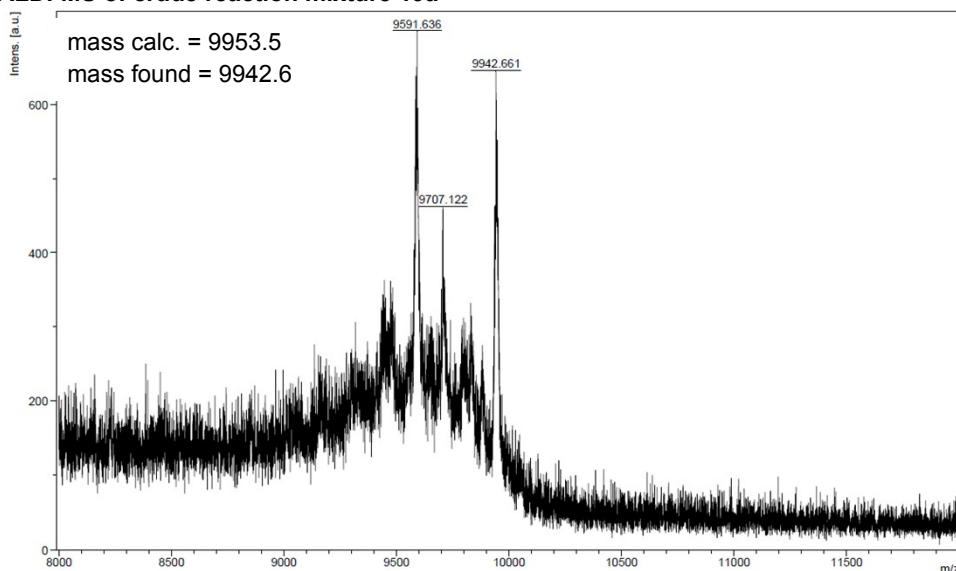

**DNA conjugate 18b:** CPG-bound 10mer ATGC-aldehyde conjugate **13c** was reacted with 2-bromoaniline **14b** and homophthalic anhydride **15a** according to RP-03.

**HPLC trace of crude reaction mixture 18b (Analytical RP-HPLC, Method-I)**

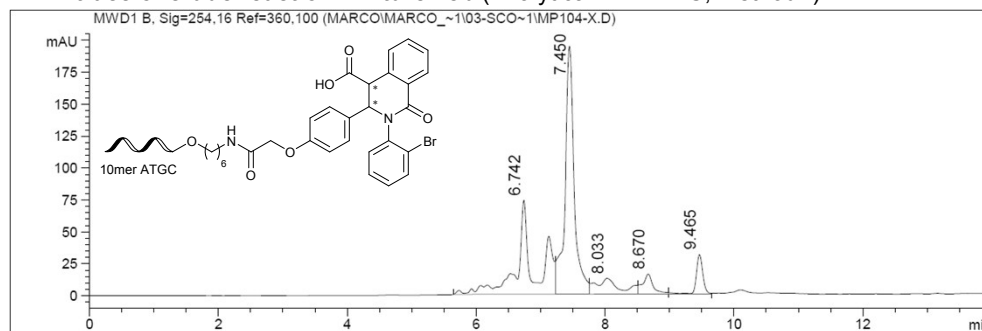

Peak list:

| Ret. Time | Width min | Height  | Area     | Area % |
|-----------|-----------|---------|----------|--------|
| 6.742     | 0.298     | 73.922  | 1321.518 | 33.363 |
| 7.450     | 0.165     | 194.477 | 1931.022 | 48.751 |
| 8.033     | 0.425     | 12.362  | 315.422  | 7.963  |
| 8.670     | 0.189     | 15.643  | 177.239  | 4.475  |
| 9.465     | 0.117     | 30.828  | 215.774  | 5.448  |

**MALDI-MS spectrum of crude reaction mixture 18b**

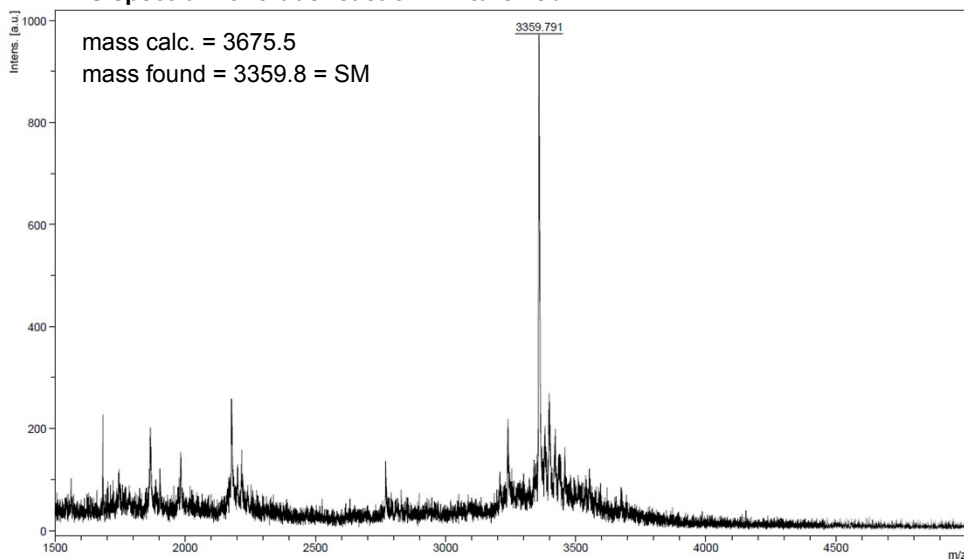

**DNA conjugate 18c:** CPG-bound 10mer ATGC-aldehyde conjugate **13c** was reacted with 4-bromoaniline **14c** and homophthalic anhydride **15a** according to RP-03.

**HPLC trace of crude reaction mixture 18c (Analytical RP-HPLC, Method-I)**

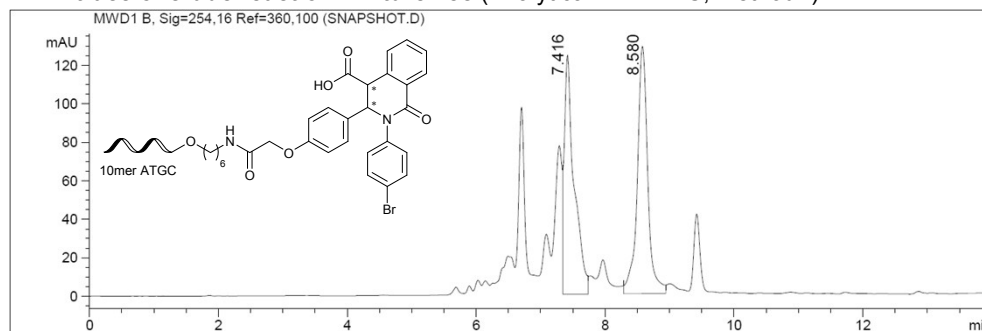

Peak list:

| Ret. Time | Width min | Height  | Area     | Area % |
|-----------|-----------|---------|----------|--------|
| 7.416     | 0.176     | 124.158 | 1311.339 | 47.587 |
| 8.580     | 0.187     | 128.492 | 1444.323 | 52.413 |

**HPLC trace of isolated product 18c (Analytical RP-HPLC, Method-I)**

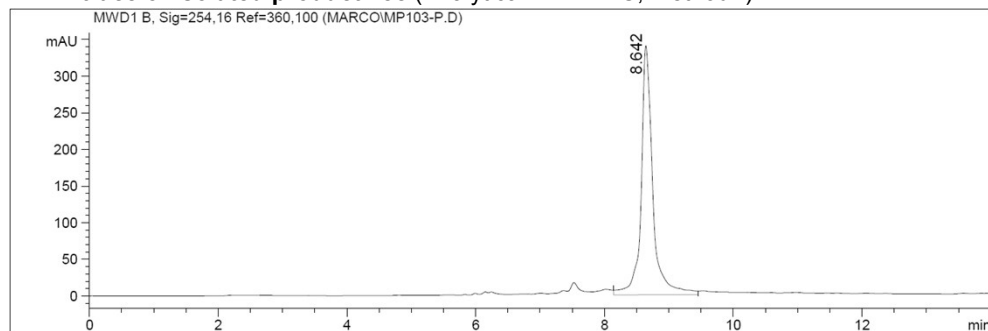

Peak list:

| Ret. Time | Width min | Height  | Area     | Area %  |
|-----------|-----------|---------|----------|---------|
| 8.642     | 0.190     | 340.304 | 4268.066 | 100.000 |

**MALDI-MS spectrum of isolated product 18c**

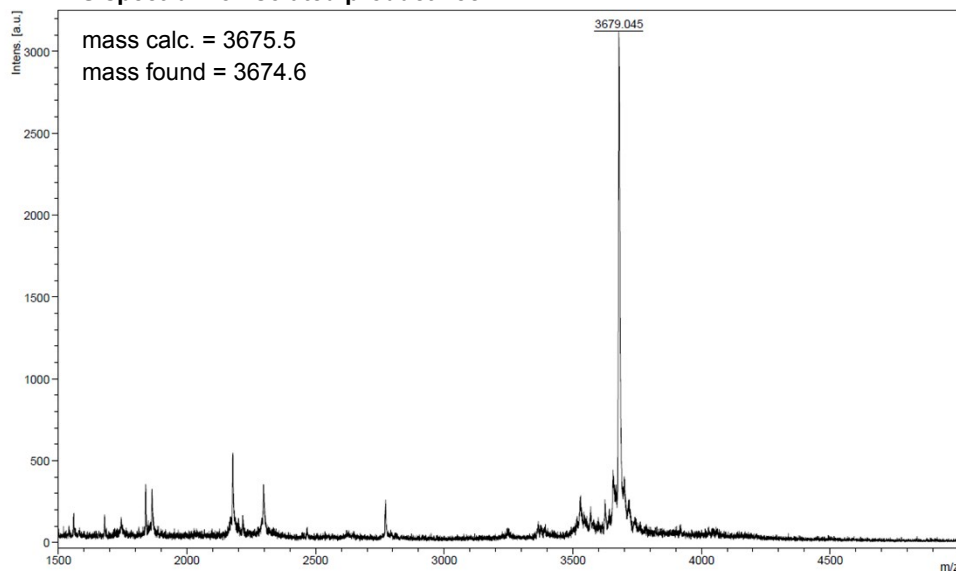

**DNA conjugate 18d:** CPG-bound 10mer ATGC-aldehyde conjugate **13c** was reacted with 3,4-dimethoxyaniline **14d** and homophthalic anhydride **15a** according to RP-03.

#### HPLC trace of crude reaction mixture 18d (Analytical RP-HPLC, Method-I)

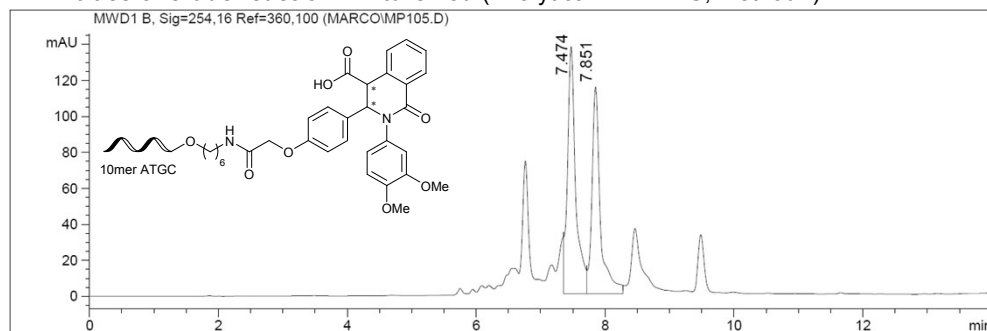

Peak list:

| Ret. Time | Width min | Height  | Area     | Area % |
|-----------|-----------|---------|----------|--------|
| 7.474     | 0.147     | 137.451 | 1213.843 | 53.931 |
| 7.851     | 0.150     | 115.115 | 1036.903 | 46.069 |

#### HPLC trace of isolated product 18d (Analytical RP-HPLC, Method-I)

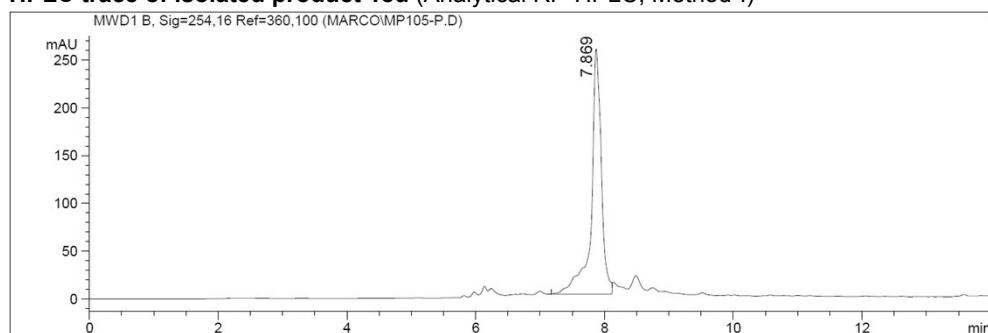

Peak list:

| Ret. Time | Width min | Height  | Area     | Area %  |
|-----------|-----------|---------|----------|---------|
| 7.869     | 0.183     | 257.443 | 2826.038 | 100.000 |

#### MALDI-MS spectrum of isolated product 18d

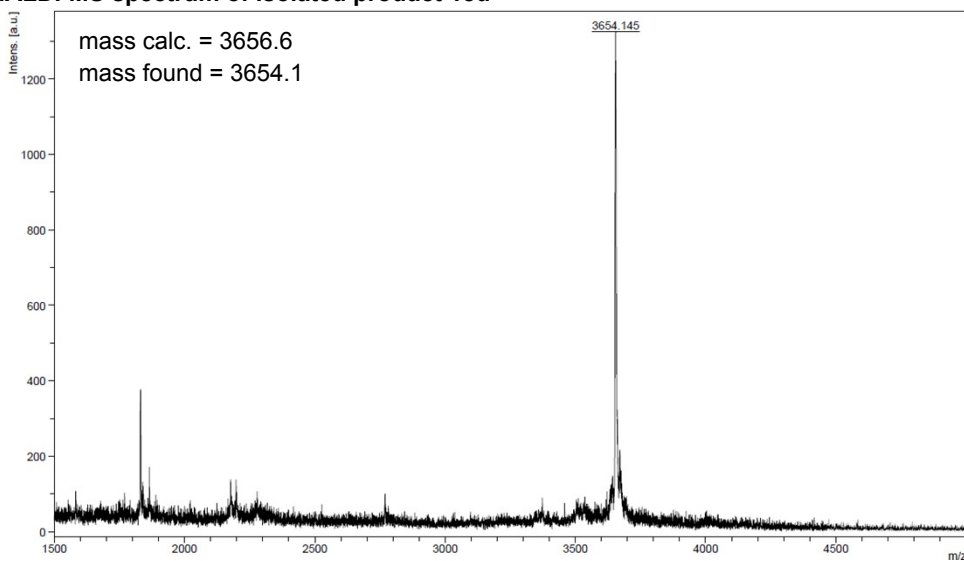

**DNA conjugate 18e:** CPG-bound 10mer ATGC-aldehyde conjugate **13c** was reacted with 3-ethylaniline **14e** and homophthalic anhydride **15a** according to RP-03.

**HPLC trace of crude reaction mixture 18e (Analytical RP-HPLC, Method-I)**

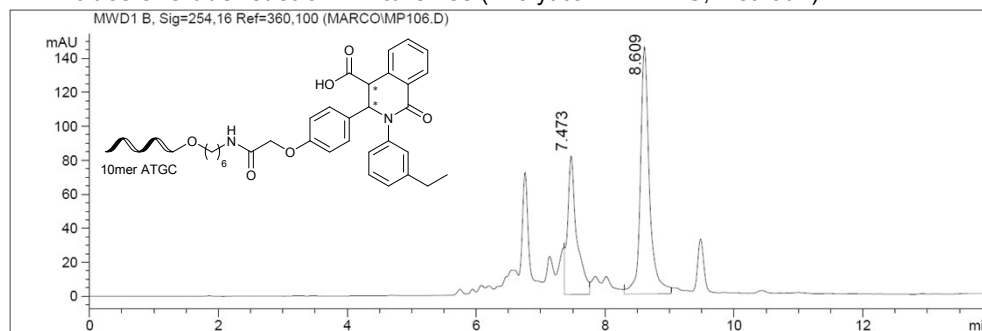

Peak list:

| Ret. Time | Width min | Height  | Area     | Area % |
|-----------|-----------|---------|----------|--------|
| 7.473     | 0.164     | 81.625  | 803.562  | 35.752 |
| 8.609     | 0.165     | 145.597 | 1444.009 | 64.248 |

**HPLC trace of isolated product 6e (Analytical RP-HPLC, Method-I)**

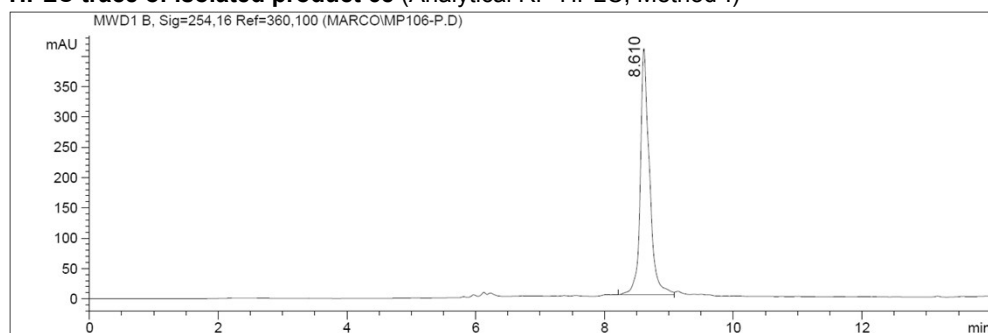

Peak list:

| Ret. Time | Width min | Height  | Area     | Area %  |
|-----------|-----------|---------|----------|---------|
| 8.610     | 0.164     | 407.221 | 4013.044 | 100.000 |

**MALDI-MS spectrum of isolated product 18e**

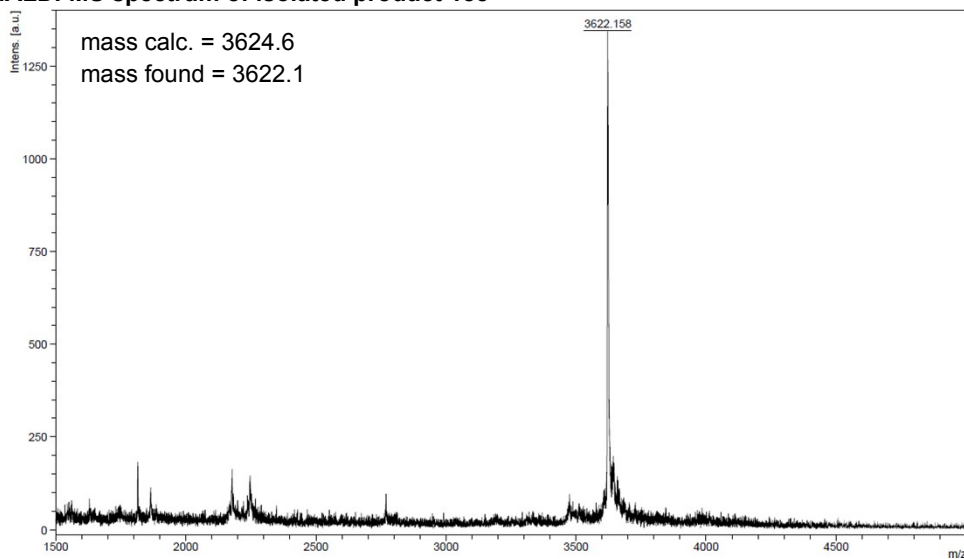

**DNA conjugate 18f:** CPG-bound 10mer ATGC-aldehyde conjugate **13c** was reacted with 4-isopropylaniline **14f** and homophthalic anhydride **15a** according to RP-03.

**HPLC trace of crude reaction mixture 18f (Analytical RP-HPLC, Method-I)**

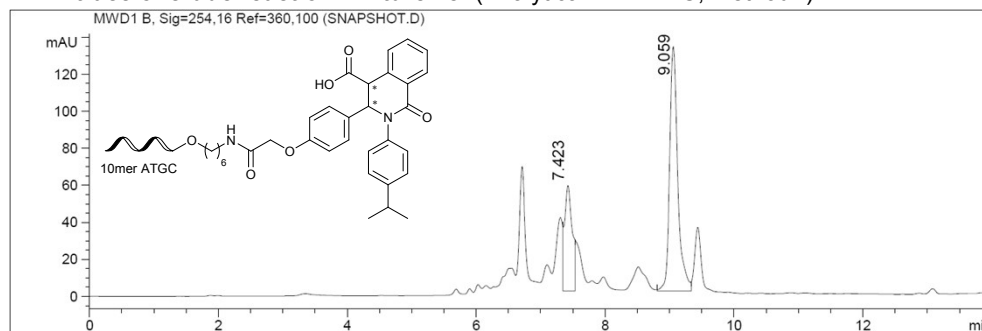

Peak list:

| Ret. Time | Width min | Height  | Area     | Area % |
|-----------|-----------|---------|----------|--------|
| 7.423     | 0.133     | 56.845  | 454.404  | 28.199 |
| 9.059     | 0.146     | 131.883 | 1157.017 | 71.801 |

**HPLC trace of isolated product 18f (Analytical RP-HPLC, Method-I)**

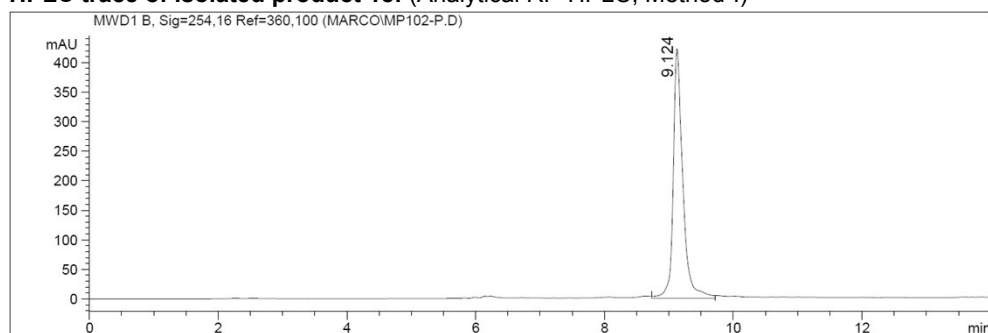

Peak list:

| Ret. Time | Width min | Height  | Area     | Area %  |
|-----------|-----------|---------|----------|---------|
| 9.124     | 0.148     | 422.379 | 4413.368 | 100.000 |

**MALDI-MS spectrum of isolated product 18f**

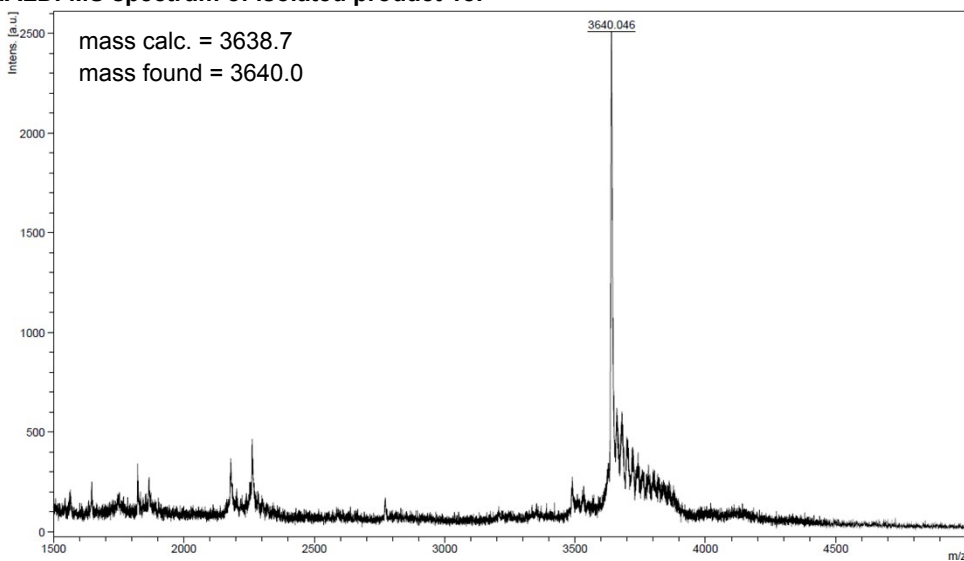

**DNA conjugate 18g:** CPG-bound 10mer ATGC-aldehyde conjugate **13c** was reacted with methyl 3-aminobenzoate **14g** and homophthalic anhydride **15a** according to RP-03.

**HPLC trace of crude reaction mixture 18g (Analytical RP-HPLC, Method-I)**

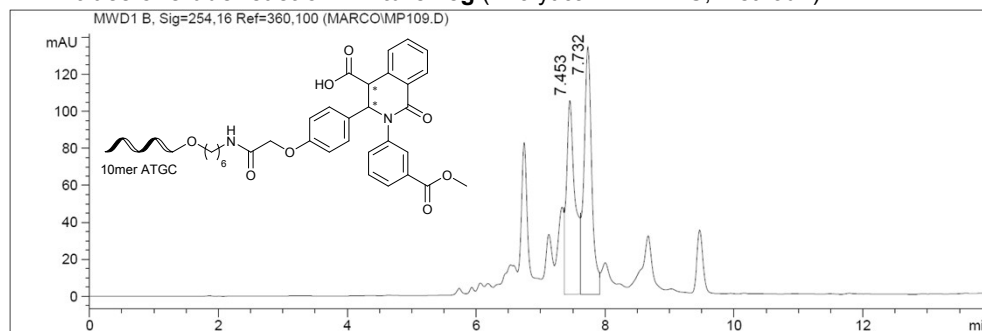

Peak list:

| Ret. Time | Width min | Height  | Area     | Area % |
|-----------|-----------|---------|----------|--------|
| 7.453     | 0.153     | 104.916 | 962.440  | 46.147 |
| 7.732     | 0.140     | 133.932 | 1123.134 | 53.853 |

**HPLC trace of isolated product 18g (Analytical RP-HPLC, Method-I)**

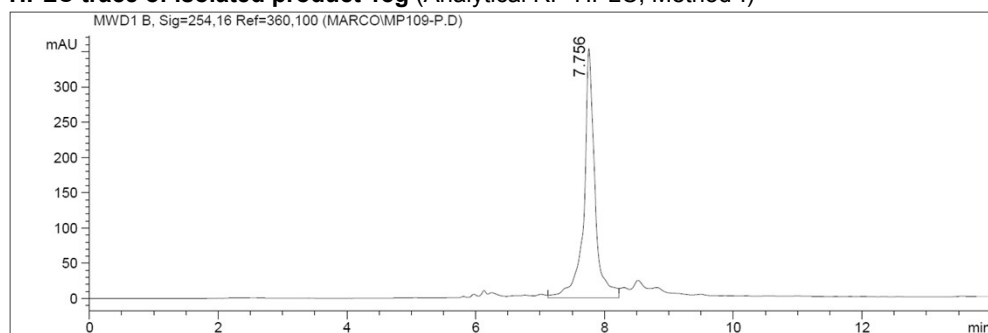

Peak list:

| Ret. Time | Width min | Height  | Area     | Area %  |
|-----------|-----------|---------|----------|---------|
| 7.756     | 0.160     | 353.485 | 4181.745 | 100.000 |

**MALDI-MS spectrum of isolated product 18g**

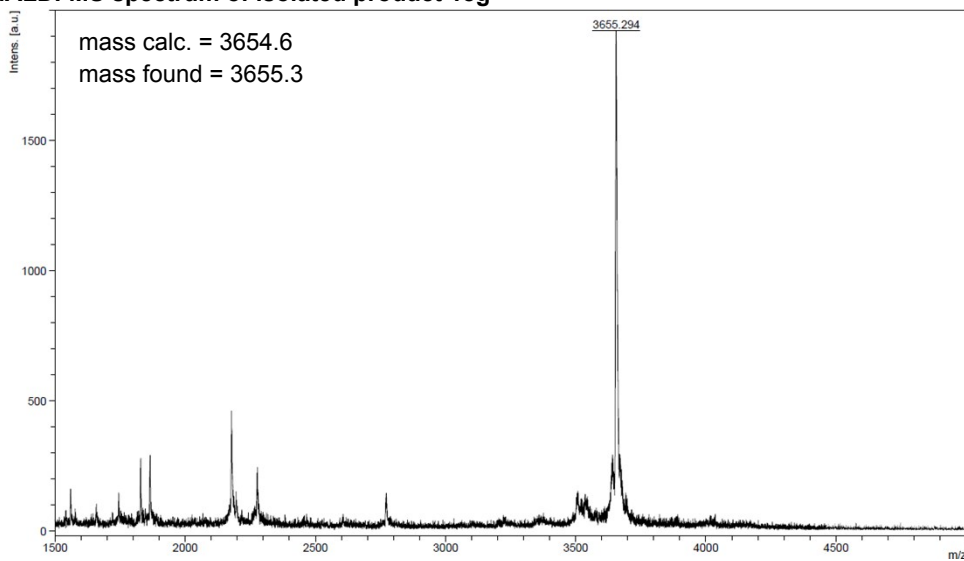



**DNA conjugate 18h:** CPG-bound 10mer ATGC-aldehyde conjugate **13c** was reacted with 3-ethynylaniline **14h** and homophthalic anhydride **15a** according to RP-03.

**HPLC trace of crude reaction mixture 18h (Analytical RP-HPLC, Method-I)**

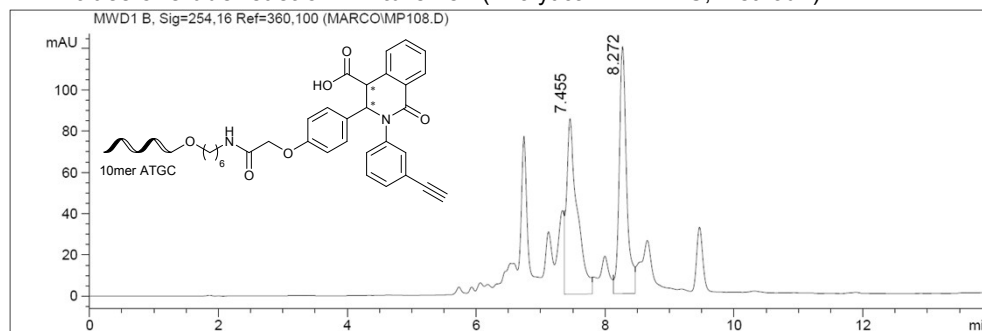

Peak list:

| Ret. Time | Width min | Height  | Area    | Area % |
|-----------|-----------|---------|---------|--------|
| 7.455     | 0.192     | 85.166  | 978.952 | 50.342 |
| 8.272     | 0.134     | 119.972 | 965.663 | 49.658 |

**HPLC trace of isolated product 18h (Analytical RP-HPLC, Method-I)**

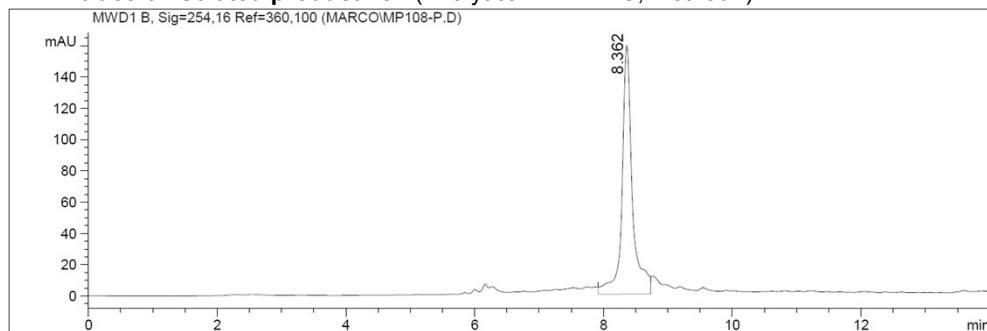

Peak list:

| Ret. Time | Width min | Height  | Area     | Area %  |
|-----------|-----------|---------|----------|---------|
| 8.362     | 0.163     | 158.998 | 1779.070 | 100.000 |

**MALDI-MS spectrum of isolated product 18h**

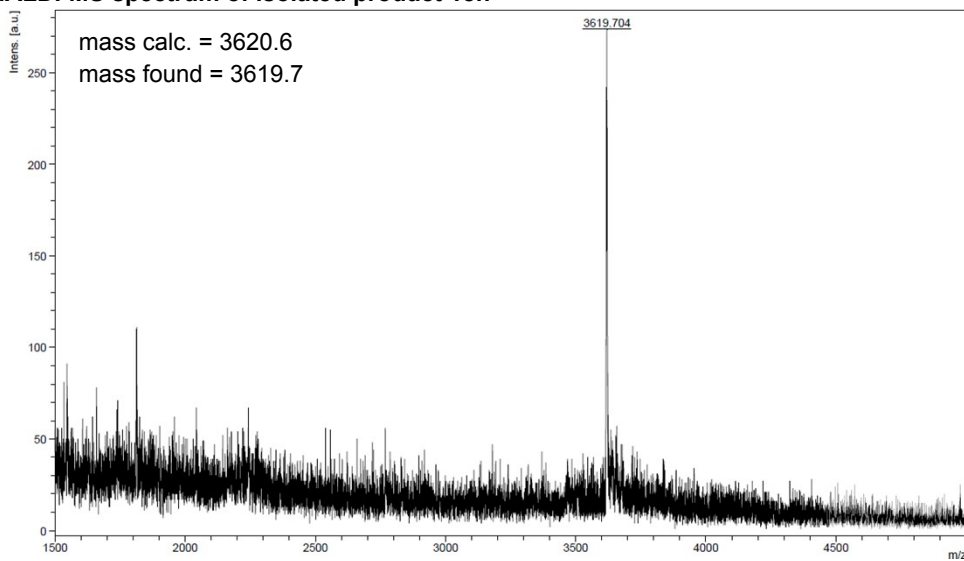

**DNA conjugate 18i:** CPG-bound 10mer ATGC-aldehyde conjugate **13c** was reacted with propylamine **14i** and homophthalic anhydride **15a** according to RP-03.

**HPLC trace of crude reaction mixture 18i (Analytical RP-HPLC, Method-I)**

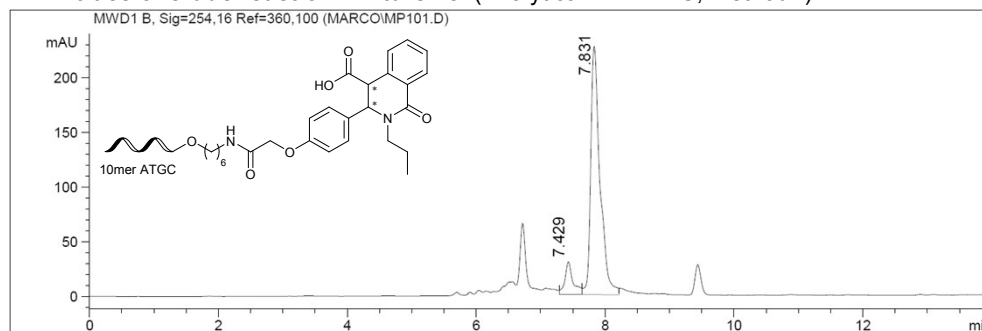

Peak list:

| Ret. Time | Width min | Height  | Area     | Area % |
|-----------|-----------|---------|----------|--------|
| 7.429     | 0.147     | 29.976  | 263.737  | 10.437 |
| 7.831     | 0.166     | 227.281 | 2263.170 | 89.563 |

**HPLC trace of isolated product 18i (Analytical RP-HPLC, Method-I)**

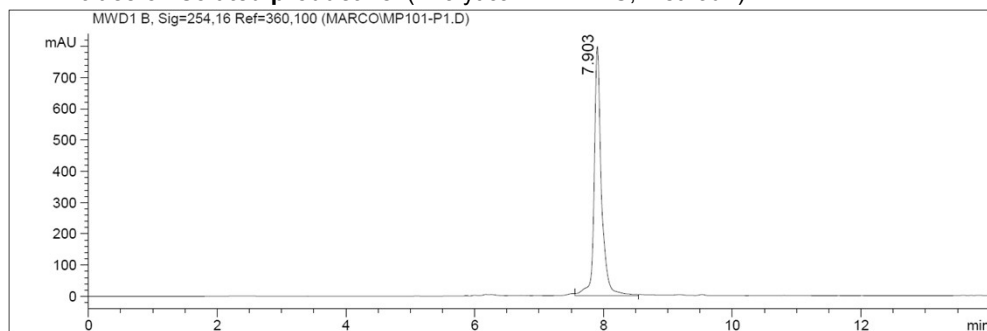

Peak list:

| Ret. Time | Width min | Height  | Area     | Area %  |
|-----------|-----------|---------|----------|---------|
| 7.903     | 0.114     | 800.325 | 6296.851 | 100.000 |

**MALDI-MS spectrum of isolated product 18i**

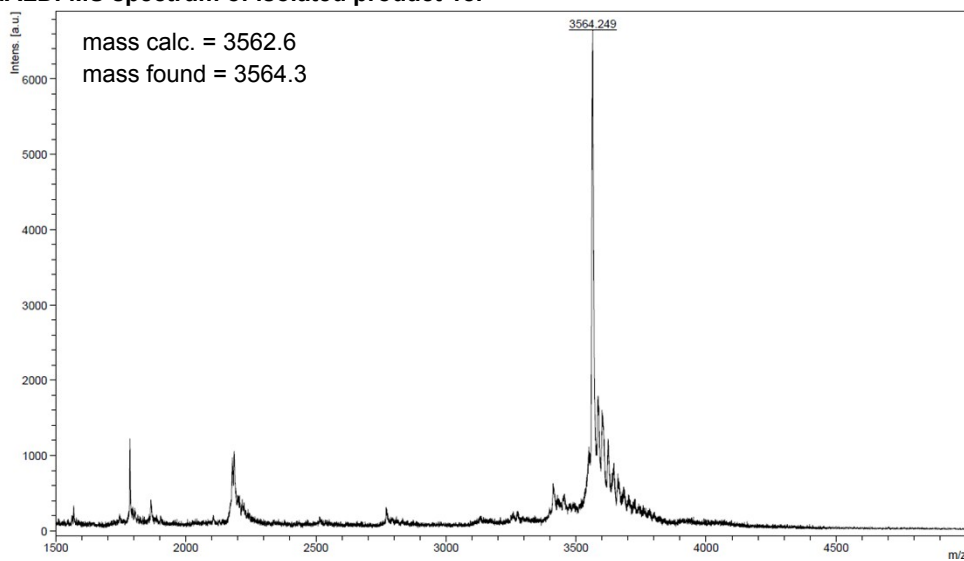

**DNA conjugate 18j:** CPG-bound 10mer ATGC-aldehyde conjugate **13c** was reacted with benzylamine **14j** and homophthalic anhydride **15a** according to RP-03.

**HPLC trace of crude reaction mixture 18j (Analytical RP-HPLC, Method-I)**

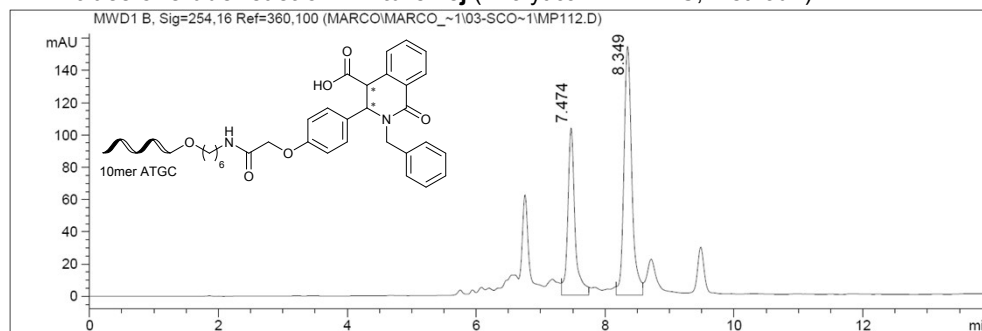

Peak list:

| Ret. Time | Width min | Height  | Area     | Area % |
|-----------|-----------|---------|----------|--------|
| 7.474     | 0.129     | 103.798 | 802.549  | 38.078 |
| 8.349     | 0.141     | 154.408 | 1305.097 | 61.922 |

**HPLC trace of the isolated product 18j (Analytical RP-HPLC, Method-I)**

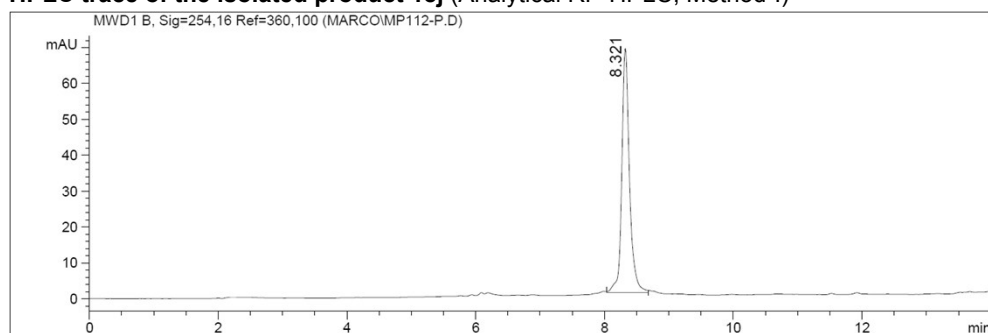

Peak list:

| Ret. Time | Width min | Height | Area    | Area %  |
|-----------|-----------|--------|---------|---------|
| 8.321     | 0.139     | 68.131 | 566.380 | 100.000 |

**MALDI-MS spectrum of isolated product 18j**

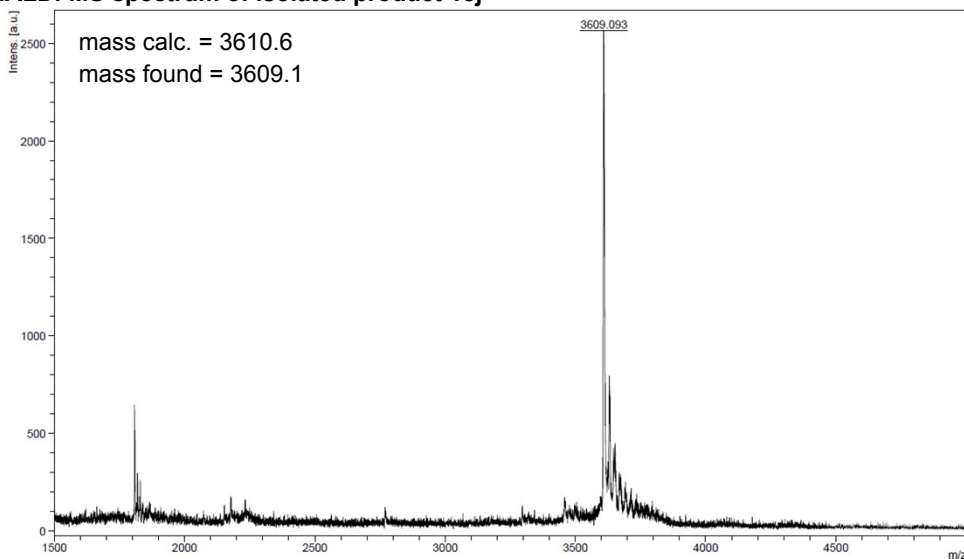

**DNA conjugate 18k:** CPG-bound 10mer ATGC-aldehyde conjugate **13c** was reacted with 4-iodobenzylamine **14k** and homophthalic anhydride **15a** according to RP-03.

**HPLC trace of crude reaction mixture 18k (Analytical RP-HPLC, Method-I)**

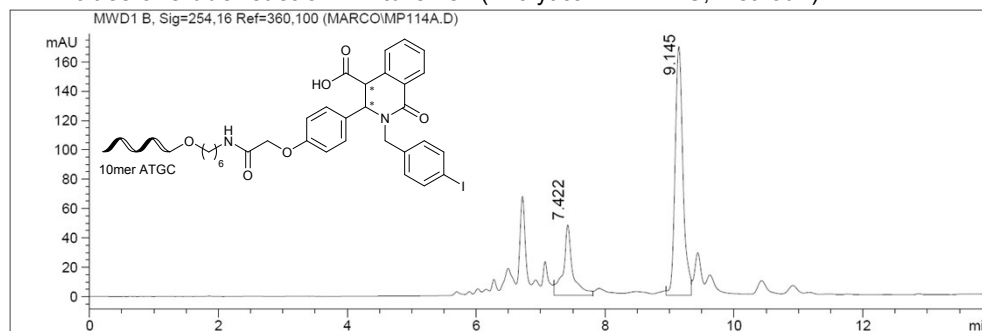

Peak list:

| Ret. Time | Width min | Height  | Area     | Area % |
|-----------|-----------|---------|----------|--------|
| 7.422     | 0.169     | 48.195  | 489.194  | 25.385 |
| 9.145     | 0.141     | 169.850 | 1437.921 | 74.615 |

**HPLC trace of isolated product 18k (Analytical RP-HPLC, Method-I)**

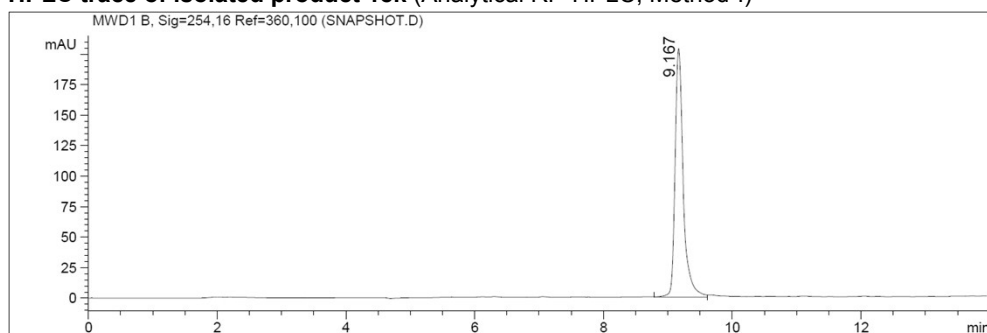

Peak list:

| Ret. Time | Width min | Height  | Area     | Area %  |
|-----------|-----------|---------|----------|---------|
| 9.167     | 0.136     | 204.183 | 1819.655 | 100.000 |

**MALDI-MS spectrum of isolated product 18k**

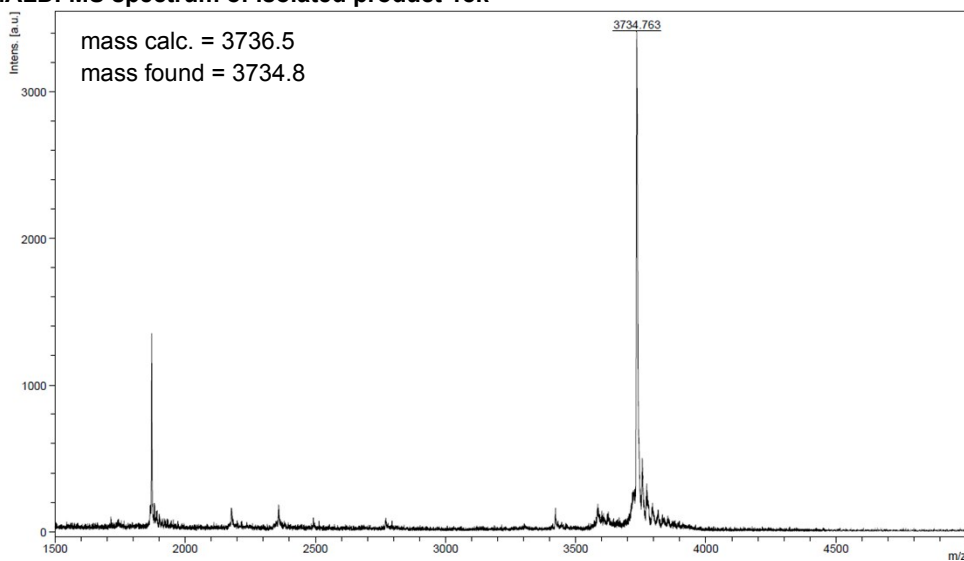

**DNA conjugate 18I:** CPG-bound 10mer ATGC-aldehyde conjugate **13c** was reacted with 4-methoxybenzylamine **14I** and homophthalic anhydride **15a** according to RP-03.

**HPLC trace of crude reaction mixture 18I (Analytical RP-HPLC, Method-I)**

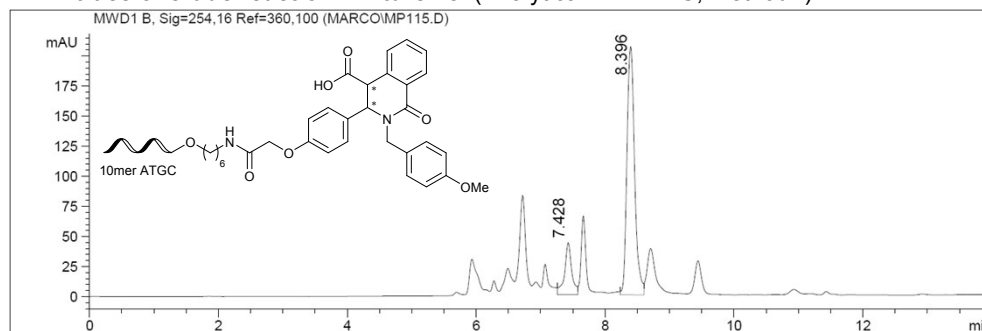

Peak list:

| Ret. Time | Width min | Height  | Area     | Area % |
|-----------|-----------|---------|----------|--------|
| 7.428     | 0.129     | 43.345  | 334.211  | 16.405 |
| 8.396     | 0.137     | 206.483 | 1703.029 | 83.595 |

**HPLC trace of isolated product 18I (Analytical RP-HPLC, Method-I)**

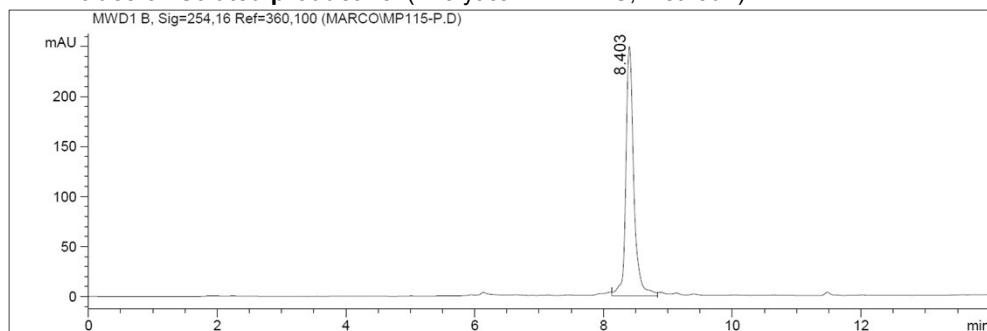

Peak list:

| Ret. Time | Width min | Height  | Area     | Area %  |
|-----------|-----------|---------|----------|---------|
| 8.403     | 0.128     | 249.320 | 2128.528 | 100.000 |

**MALDI-MS spectrum of isolated product 18I**

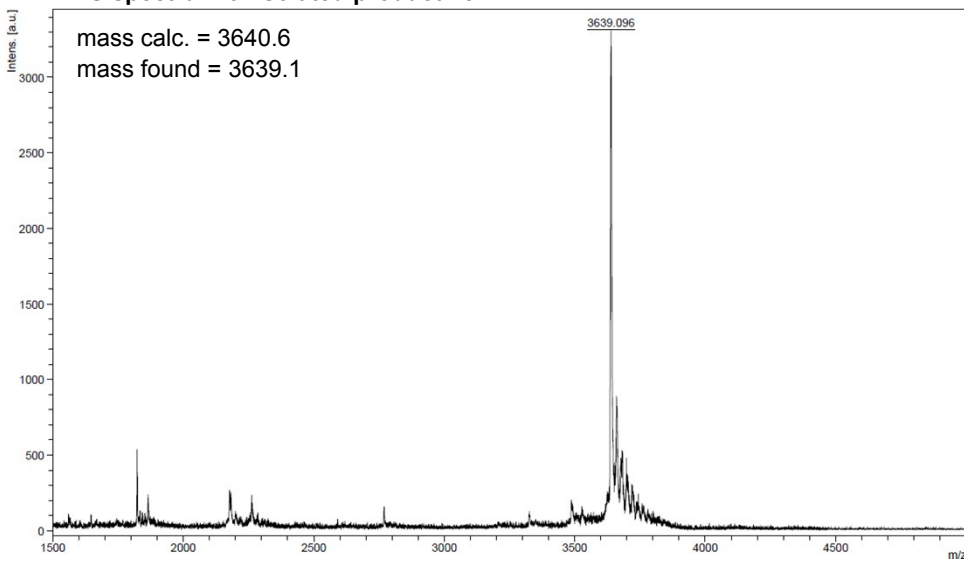

**DNA conjugate 18m:** CPG-bound 10mer ATGC-aldehyde conjugate **13c** was reacted with tryptamine **14m** and homophthalic anhydride **15a** according to RP-03.

**HPLC trace of crude reaction mixture 18m (Analytical RP-HPLC, Method-I)**

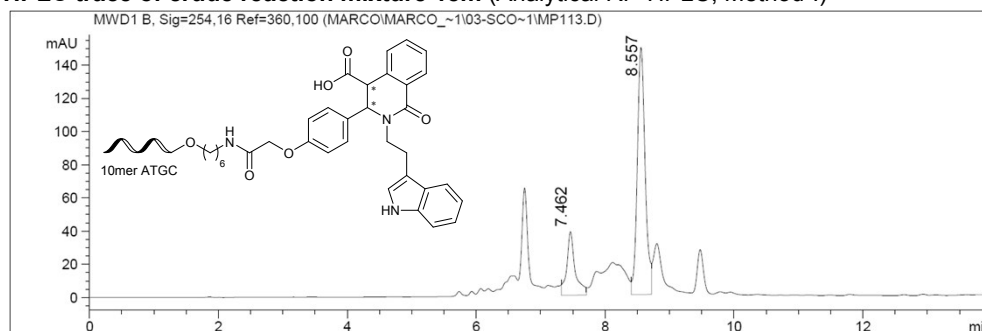

Peak list:

| Ret. Time | Width min | Height  | Area     | Area % |
|-----------|-----------|---------|----------|--------|
| 7.462     | 0.150     | 38.387  | 345.767  | 21.599 |
| 8.557     | 0.140     | 149.195 | 1255.070 | 78.401 |

**HPLC trace of isolated product 18m (Analytical RP-HPLC, Method-I)**

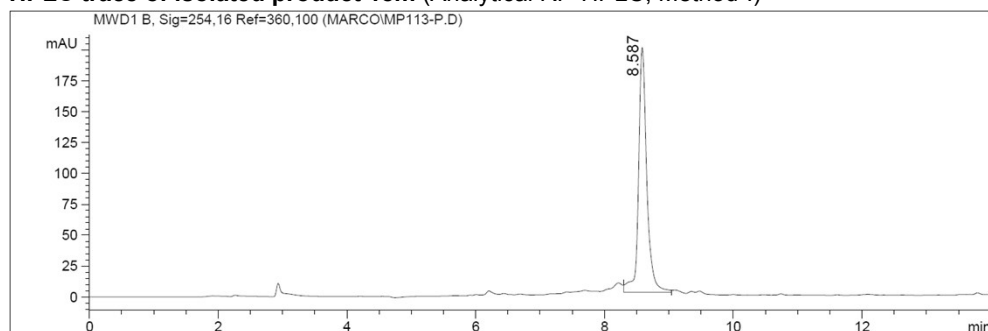

Peak list:

| Ret. Time | Width min | Height  | Area     | Area %  |
|-----------|-----------|---------|----------|---------|
| 8.587     | 0.148     | 198.422 | 1759.228 | 100.000 |

**MALDI-MS spectrum of isolated product 18m**

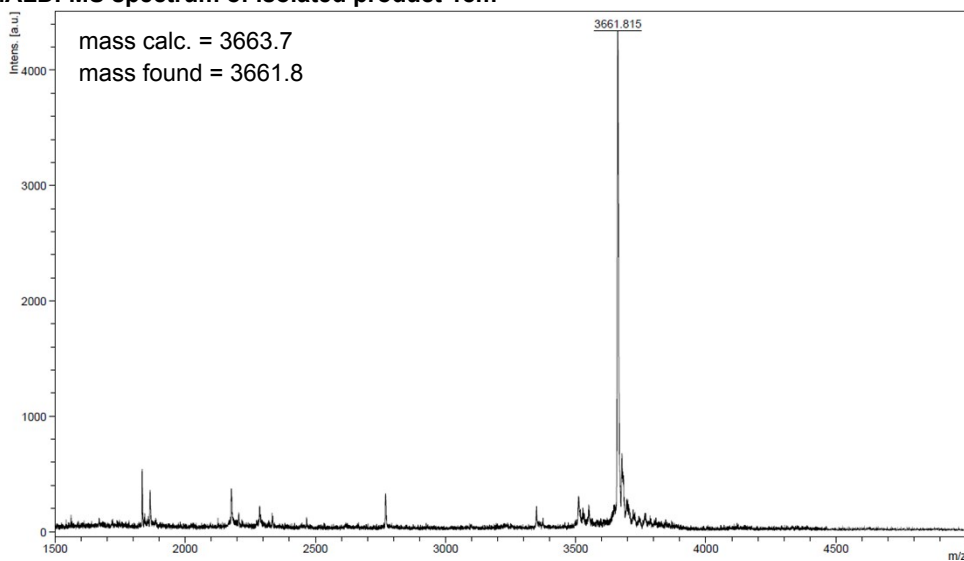

**DNA conjugate 18n:** CPG-bound 10mer ATGC-aldehyde conjugate **13c** was reacted with propylamine **14i** and glutaric anhydride **15b** according to RP-03.

**HPLC trace of crude reaction mixture 18n (Analytical RP-HPLC, Method-I)**

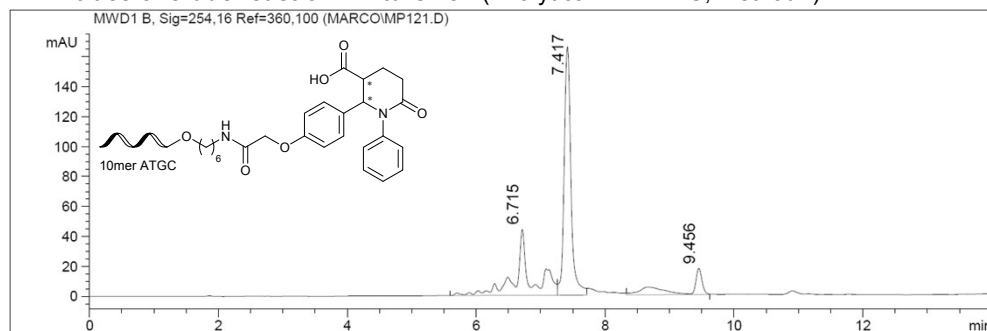

Peak list:

| Ret. Time | Width min | Height  | Area     | Area % |
|-----------|-----------|---------|----------|--------|
| 6.715     | 0.276     | 44.096  | 729.753  | 33.003 |
| 7.417     | 0.122     | 166.128 | 1213.558 | 54.882 |
| 9.456     | 0.253     | 17.632  | 267.883  | 12.115 |

**MALDI-MS spectrum of crude reaction mixture 18n**

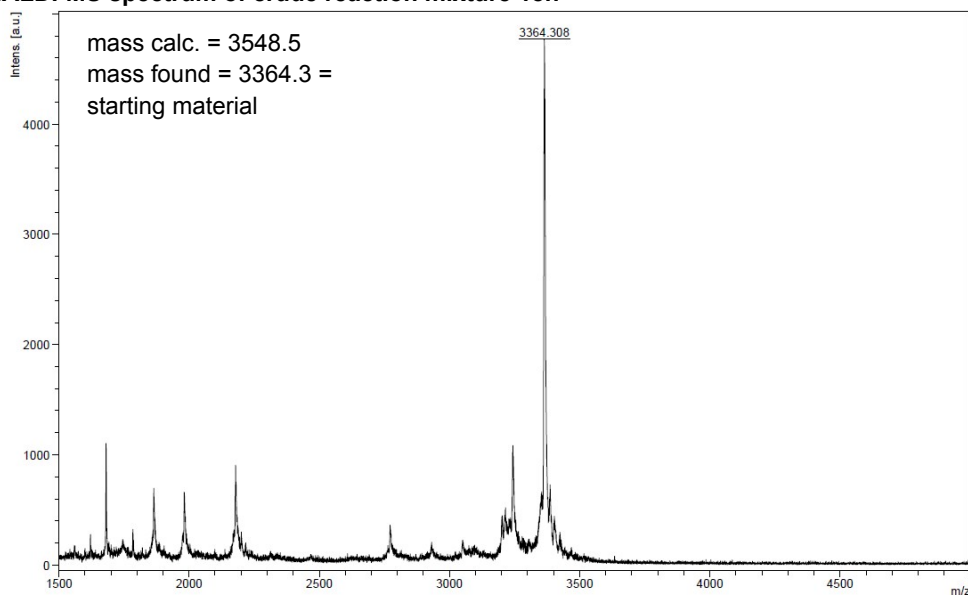

**DNA conjugate 18n:** CPG-bound 10mer ATGC-aldehyde conjugate **13c** was reacted with propylamine **14i** and succini anhydride **15c** according to RP-03.

**HPLC trace of crude reaction mixture 18o (Analytical RP-HPLC, Method-I)**

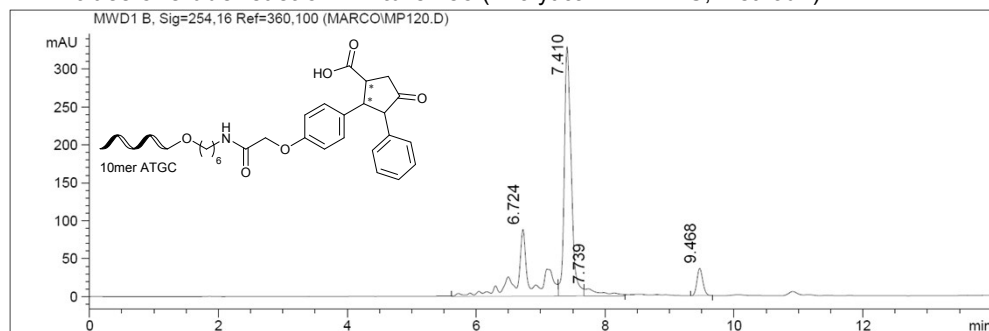

Peak list:

| Ret. Time | Width min | Height  | Area     | Area % |
|-----------|-----------|---------|----------|--------|
| 6.724     | 0.277     | 88.331  | 1465.854 | 33.998 |
| 7.410     | 0.124     | 329.489 | 2444.827 | 56.704 |
| 7.739     | 0.312     | 9.436   | 176.636  | 4.097  |
| 9.468     | 0.104     | 35.974  | 224.242  | 5.201  |

**MALDI-MS spectrum of crude reaction mixture 18o**

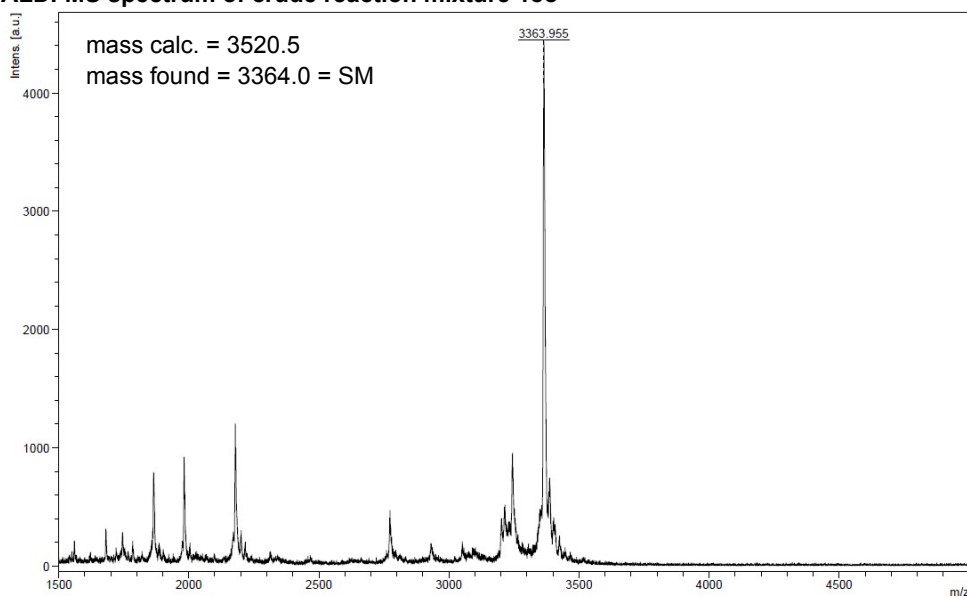



## Castagnoli-Cushman reaction on a DNA-aldehyde conjugate in solution

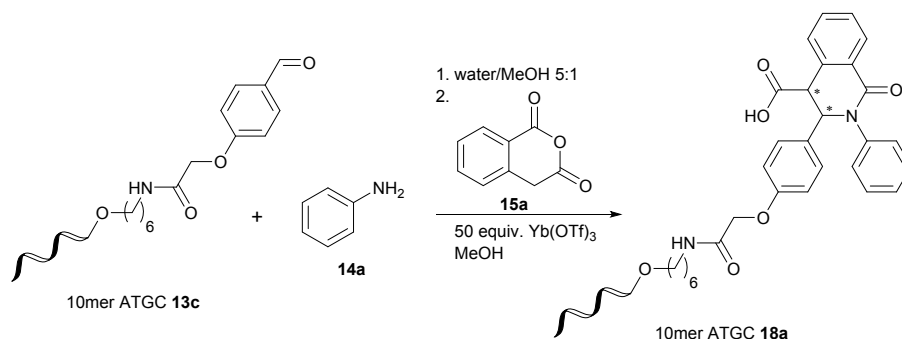

**Scheme S1** Yb(OTf)<sub>3</sub>-mediated Castagnoli-Cushman reaction on oligonucleotide in solution.

Oligonucleotide-aldehyde conjugate **13** (500 pmol) was dissolved in a final volume of 25  $\mu\text{L}$  of water. To this solution amine **14** (250 nmol, 500 equiv.) pre-dissolved in 5  $\mu\text{L}$  of methanol was added. The solution was shaken at ambient temperature for 4 h. Afterwards 5  $\mu\text{L}$  of Yb(OTf)<sub>3</sub> (25 nmol, 50 equiv.) dissolved in methanol and 15  $\mu\text{L}$  of anhydride **15a** (250 nmol, 500 equiv.) dissolved in methanol were added and the solution was shaken for 1 h at ambient temperature. Then the reaction mixture was diluted with 75  $\mu\text{L}$  of water and extracted 6x with 200  $\mu\text{L}$  ethyl acetate. The aqueous phase was dried in SpeedVac and the residue was dissolved in 40  $\mu\text{L}$  of distilled water. Ethanol precipitation was performed by adding four volumes of ethanol and incubating this solution at -80  $^\circ\text{C}$  overnight. The DNA conjugate was centrifuged to obtain a pellet, the supernatant was taken off, the DNA was dried in a SpeedVac, re-dissolved in 100  $\mu\text{L}$  distilled water and analyzed by analytical RP-HPLC (Method I) and MALDI-MS.

### HPLC trace of crude reaction mixture (Analytical RP-HPLC, Method-I)

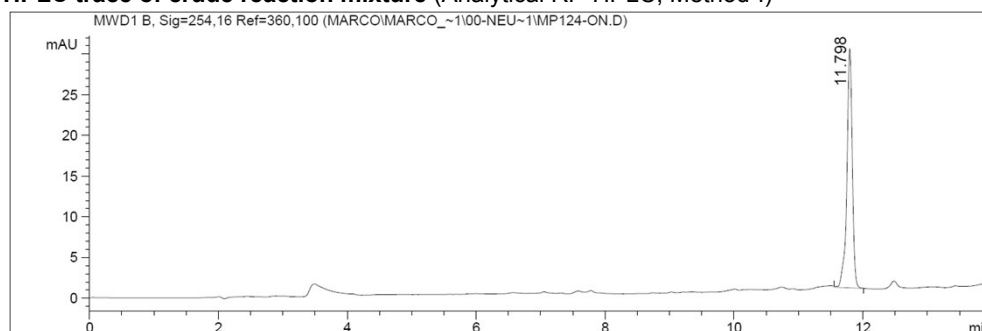

**MALDI-MS spectrum of crude reaction mixture**

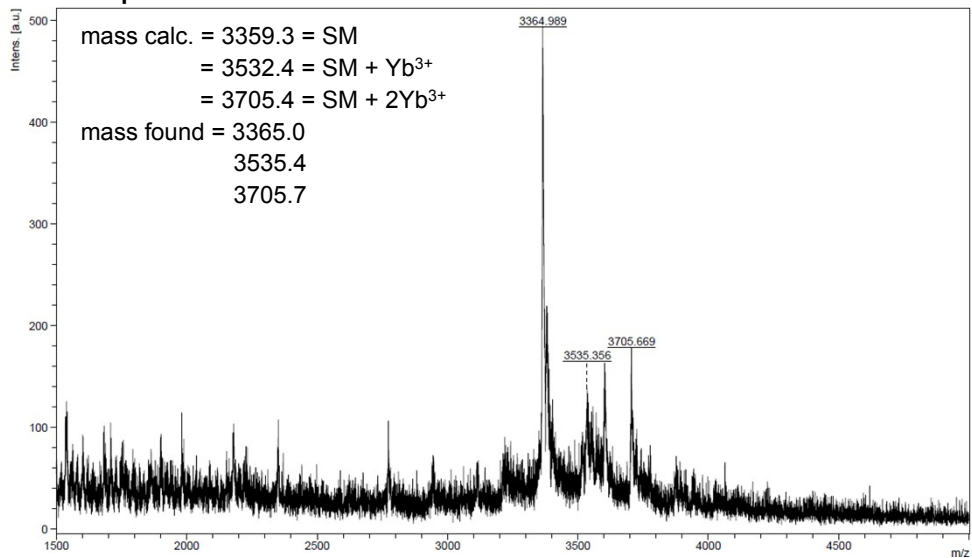

## AgOAc-mediated 1,3-dipolar cycloaddition on CPG-bound DNA oligonucleotides

**Table S3** Optimization of AgOAc-mediated 1,3-dipolar cycloaddition on CPG-bound hexT.<sup>a</sup>

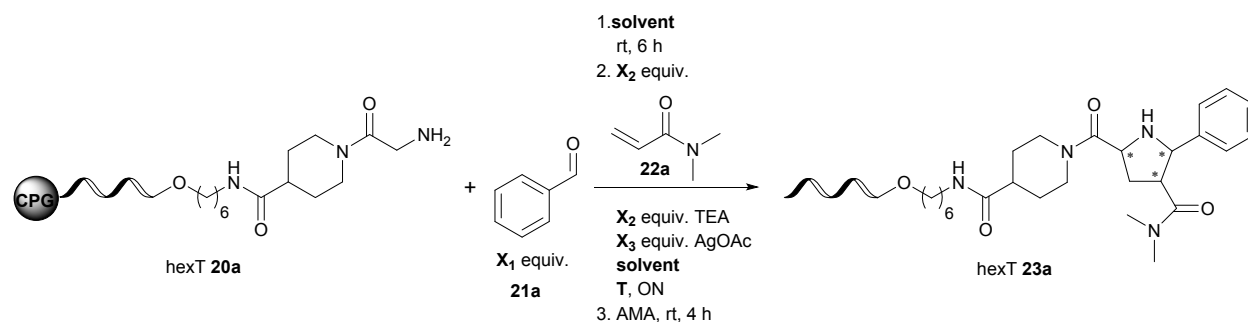

| Entry | Reaction conditions <sup>b</sup>                                                                                                                                | HPLC trace of crude reaction mixture <sup>c</sup> |
|-------|-----------------------------------------------------------------------------------------------------------------------------------------------------------------|---------------------------------------------------|
| 1     | hexT-glycine conjugate <b>20a</b>                                                                                                                               |                                                   |
| 2     | hexT-pyrrolidine conjugate <b>23a</b>                                                                                                                           |                                                   |
| 3     | 1. 1000 equiv. <b>21a</b> , ACN, 6 h, rt<br>2. 1000 equiv. <b>22a</b><br>1000 equiv. TEA,<br>100 equiv. AgOAc<br>ACN, rt, ON<br><br>=> conversion 31 %          |                                                   |
| 4     | 1. 1000 equiv. <b>21a</b> , ACN, 6 h, rt<br>2. 1000 equiv. <b>22a</b> ,<br>1000 equiv. TEA,<br><b>200 equiv.</b> AgOAc<br>ACN, rt, ON<br><br>=> conversion 29 % |                                                   |

5

- 1000 equiv. **21a**, ACN, 6 h, rt
- 1000 equiv. **22a**  
1000 equiv. TEA,  
**100 equiv.** AgOAc  
ACN, **40 °C**, ON

=&gt; conversion 48 %

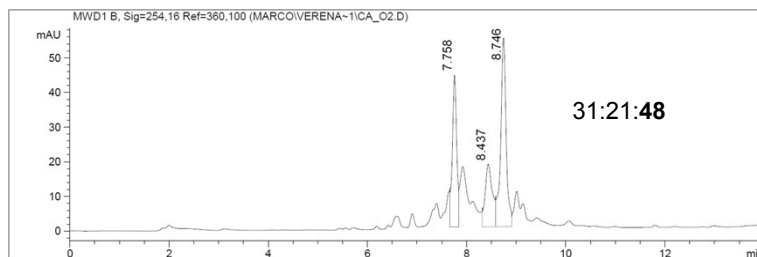

6

- 1000 equiv. **21a**, ACN, 6 h, rt
- 1000 equiv. **22a**  
1000 equiv. TEA,  
**200 equiv.** AgOAc  
ACN, **40 °C**, ON

=&gt; conversion 36 %

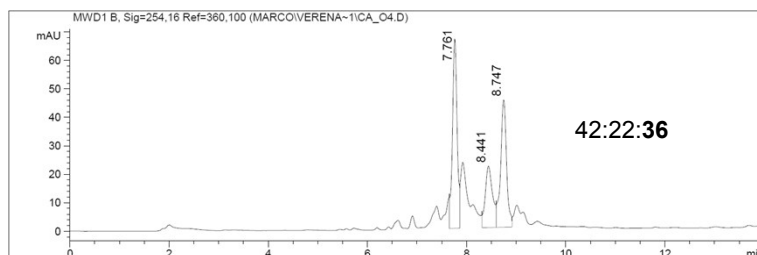

7

- 2000 equiv.** **21a**, ACN, 6 h, rt
- 2000 equiv.** **22a**  
**2000 equiv.** TEA,  
100 equiv. AgOAc  
ACN, **40 °C**, ON

=&gt; conversion 41 %

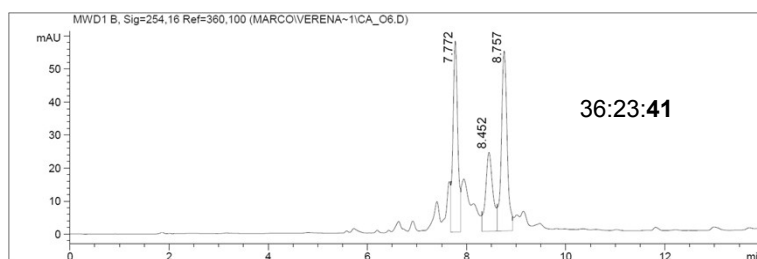

8

- 4000 equiv.** **21a**, ACN, 6 h, rt
- 4000 equiv.** **22a**  
**4000 equiv.** TEA,  
100 equiv. AgOAc  
ACN, **40 °C**, ON

=&gt; conversion 53 %

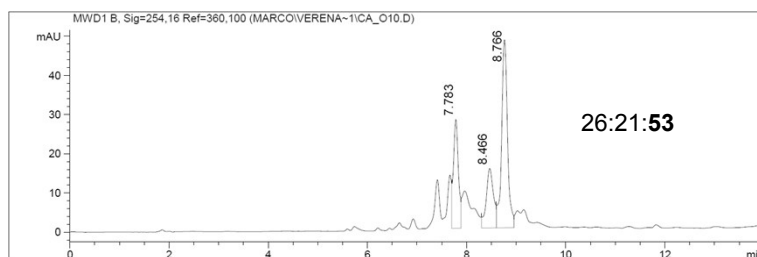

9

- 1000 equiv. **21a**, ACN, 6 h, rt
- 3000 equiv.** **22a**  
**3000 equiv.** TEA,  
100 equiv. AgOAc  
ACN, **50 °C**, ON

=&gt; conversion 68 %

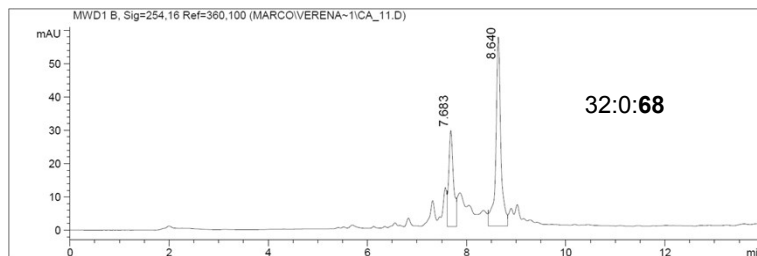

10

- 1000 equiv. **21a**, ACN, 6 h, rt
- 4000 equiv.** **22a**  
**4000 equiv.** TEA,  
100 equiv. AgOAc  
ACN, **50 °C**, ON

=&gt; conversion 70 %

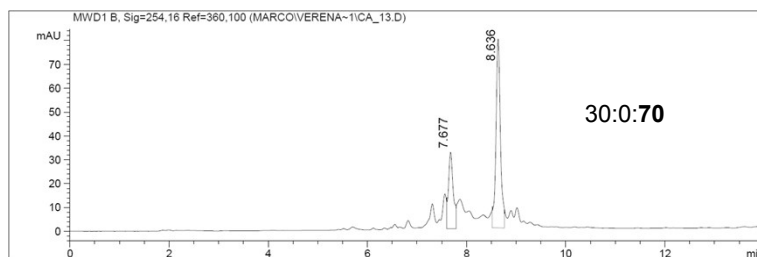

- 11
1. 1000 equiv. **21a**, ACN/TEOF (2:1), 6 h, rt
  2. 4000 equiv. **22a**  
4000 equiv. TEA,  
100 equiv. AgOAc  
**ACN/TEOF (2:1)**, 50 °C, ON
- => conversion 70 %

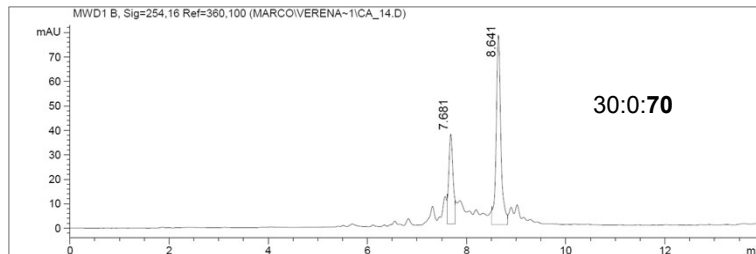

- 12
1. 1000 equiv. **21a**, ACN/TEOF (2:1), 6 h, rt
  2. 4000 equiv. **22a**  
4000 equiv. TEA,  
100 equiv. **AgTFA**  
**ACN/TEOF (2:1)**, 50 °C, ON
- => conversion 66 %

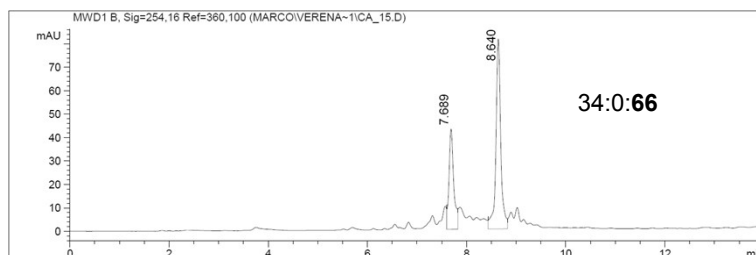

- 13
1. 1000 equiv. **21a**, ACN/TEOF (2:1), 6 h, rt
  2. 4000 equiv. **22a**  
4000 equiv. TEA,  
100 equiv. **AgSbF<sub>6</sub>**  
**ACN/TEOF (2:1)**, 50 °C, ON
- => conversion 68 %

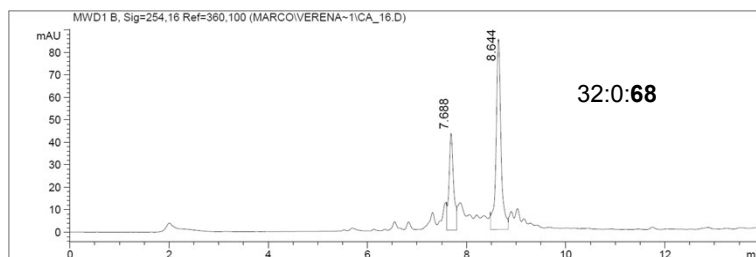

- 14
1. 1000 equiv. **21a**, ACN/TEOF (2:1), 6 h, rt
  2. 4000 equiv. **22a**  
4000 equiv. TEA,  
100 equiv. **AgOTf**  
**ACN/TEOF (2:1)**, 50 °C, ON
- => conversion 68 %

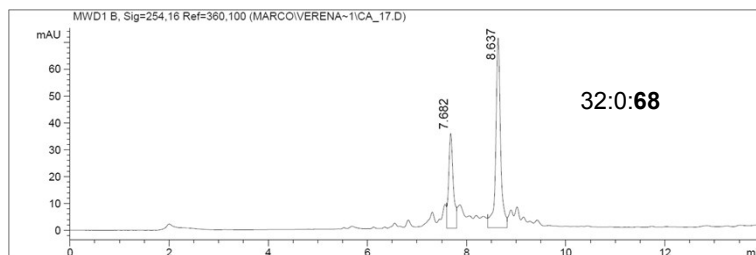

- 15
1. 1000 equiv. **21a**, **MeOH**/TEOF (2:1), 6 h, rt
  2. 4000 equiv. **22a**  
4000 equiv. TEA,  
100 equiv. AgOAc  
**MeOH/TEOF (2:1)**, 50 °C, ON
- => conversion 43 %

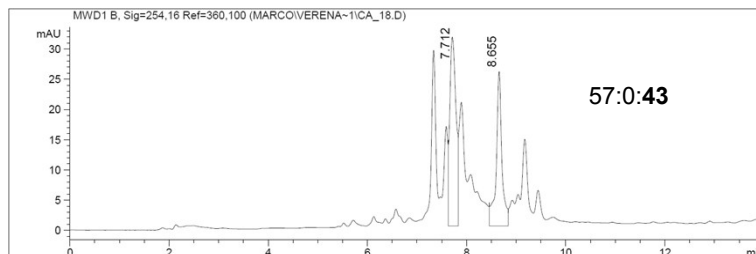

- 16
1. 1000 equiv. **21a**, **THF**/TEOF (2:1), 6 h, rt
  2. 4000 equiv. **22a**  
4000 equiv. TEA,  
100 equiv. AgOAc  
**THF/TEOF (2:1)**, 50 °C, ON
- => conversion 70 %

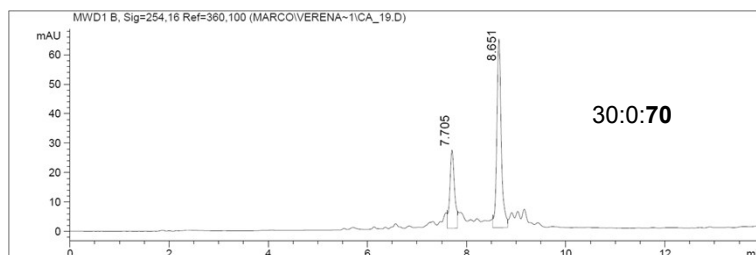

17

1. 1000 equiv. **21a**,  
**toluene**/TEOF  
(2:1), 6 h, rt
  2. 4000 equiv. **22a**  
4000 equiv. TEA,  
100 equiv. AgOAc  
**toluene**/TEOF (2:1), 50 °C, ON
- => conversion 59 %

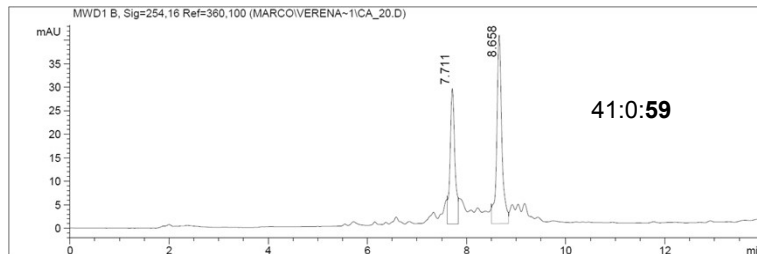

<sup>a</sup> Reaction of CPG-bound hexT-conjugate **20a** (20 nmol) and aldehyde **21a** (X equiv.) in 50  $\mu$ L solvent at ambient temperature for 6 h, then heterocycle formation with AgOAc (X equiv.), dissolved in 30  $\mu$ L solvent, triethylamine (X equiv.) and *N,N*-dimethylacrylamide **22a** (X equiv.), at T for overnight. <sup>b</sup> parameters that were changed are in bold and italic. <sup>c</sup> Analytical RP-HPLC, Method-I. TEOF = triethyl orthoformate.

**Table S4** – Scope of AgOAc-mediated 1,3-dipolar cycloaddition on CPG-bound oligonucleotides.<sup>a</sup>

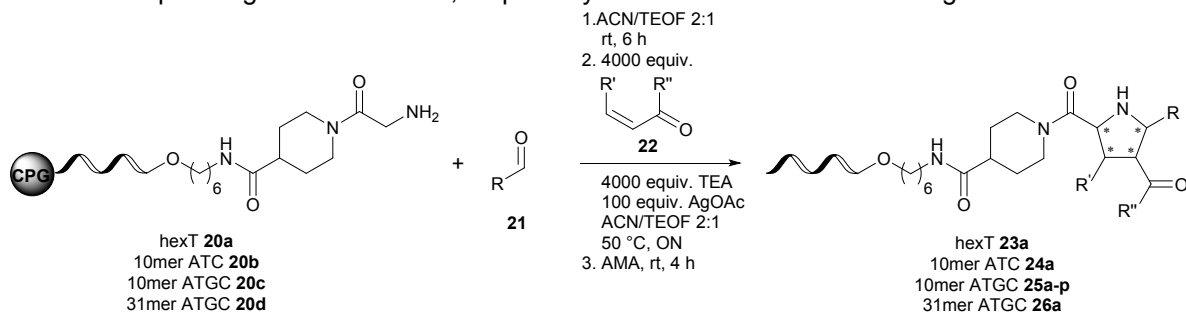

| Entry | Product    | Aldehyde | Dipolarophile | Conversion [%] <sup>b</sup> | Yield [nmol] <sup>c</sup> | Mass <sup>calc.</sup><br>Mass <sup>found</sup> <sup>d</sup> |
|-------|------------|----------|---------------|-----------------------------|---------------------------|-------------------------------------------------------------|
| 1     | <b>23a</b> |          |               | 70                          | 6.1                       | 2297.7<br>2301.1                                            |
| 2     | <b>24a</b> |          |               | 50                          | 3.4                       | 3496.6<br>3499.3                                            |
| 3     | <b>25a</b> |          |               | 50                          | 3.0                       | 3552.6<br>3553.3                                            |
| 4     | <b>26a</b> |          |               | 45                          | ---                       | 9909.6<br>9908.6                                            |
| 5     | <b>25b</b> |          |               | 48                          | 1.3                       | 3631.5<br>3633.3                                            |
| 6     | <b>25c</b> |          |               | 41                          | 1.9                       | 3587.1<br>3589.8                                            |
| 7     | <b>25d</b> |          |               | 47                          | 3.1                       | 3570.6<br>3572.6                                            |
| 8     | <b>25e</b> |          |               | 24                          | 1.1                       | 3582.6<br>3583.7                                            |
| 9     | <b>25f</b> |          |               | 38                          | 0.7                       | 3608.7<br>3613.4                                            |
| 10    | <b>25g</b> |          |               | 26                          | 0.6                       | 3576.6<br>3578.6                                            |
| 11    | <b>25h</b> |          |               | 67                          | 3.1                       | 3577.6<br>3579.0                                            |
| 12    | <b>25i</b> |          |               | 54%                         | 1.5                       | 3628.7<br>3630.9                                            |
| 13    | <b>25j</b> |          |               | 58                          | 4.0                       | 3629.7<br>3630.0                                            |

|    |            |                                                                                   |                                                                                   |      |     |                  |
|----|------------|-----------------------------------------------------------------------------------|-----------------------------------------------------------------------------------|------|-----|------------------|
| 15 | <b>25k</b> | 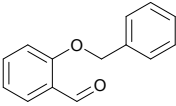 |  | 48   | 0.6 | 3658.7<br>3659.1 |
| 16 | <b>25l</b> |  |  | 30   | 1.9 | 3596.6<br>3599.4 |
| 17 | <b>25m</b> |  |  | n.d. | --- | 3504.6<br>n.d.   |
| 18 | <b>25n</b> |  |  | 20   | 1.6 | 3538.6<br>3541.2 |
| 19 | <b>25o</b> |  |  | 10   | 0.5 | 3595.6<br>3598.5 |

<sup>a</sup> CPG-bound oligonucleotide conjugate **20** (20 nmol) and aldehyde **21** (1000 equiv., 20 μmol) in 50 μL ACN/triethyl orthoformate (2:1) were condensed at ambient temperature for 6 h, then AgOAc (100 equiv., 2 μmol), dissolved in 30 μL ACN/triethyl orthoformate (2:1), triethylamine (4000 equiv., 80 μmol) and dipolarophile **22** (4000 equiv., 80 μmol) were added and reacted with the DNA-imine conjugate at 50 °C overnight. Cleavage with AMA (30 % aqueous ammonia/ 40 % aqueous methylamine, 1:1 (vol/vol)) at ambient temperature for 4 h. <sup>b</sup> Determined by analytical RP-HPLC analysis. <sup>c</sup> Determined by NanoDrop. <sup>d</sup> Measured by MALDI-MS. 10mer ATC = 5'-TTA CTA CCT A-3', 10mer ATGC = 5'-GTC ATG ATC T-3', 31mer ATGC = 5'-CAA ATC CGT TCA CAC CGA CCT GTC ATG ATC T-3'. n.d. = not detected, TEOF = triethyl orthoformate.



## Starting materials for 1,3-dipolar cycloaddition on CPG-bound oligonucleotides

**DNA conjugate 20a:** Following DMT removal, CPG-bound hexT-C<sub>6</sub>-NH<sub>2</sub> was reacted with 1-Fmoc-piperidine-4-carboxylic acid according to RP-01 and subsequently with Fmoc-glycine according to RP-02.

### HPLC trace of crude reaction mixture 20a (Analytical RP-HPLC, Method-I)

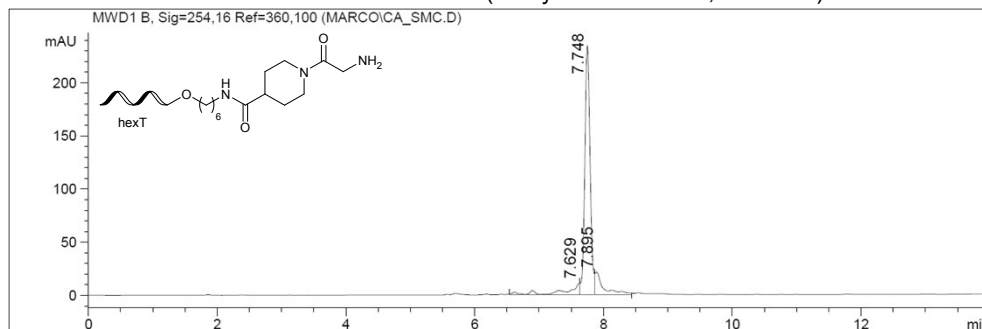

### MALDI-MS spectrum of crude reaction mixture 20a

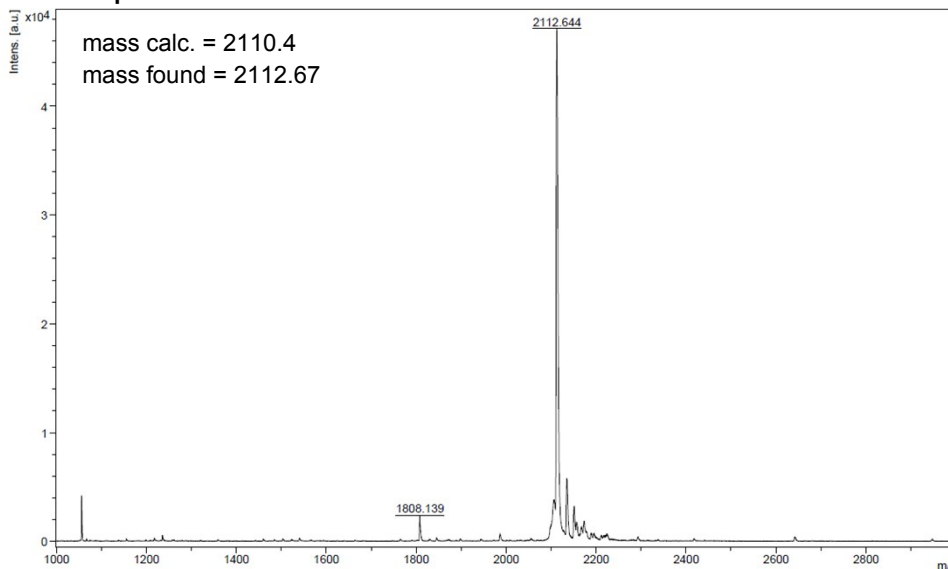

**DNA conjugate 20b:** Following DMT removal, CPG-bound ATC-C<sub>6</sub>-NH<sub>2</sub> was reacted with 1-Fmoc-piperidine-4-carboxylic acid according to RP-01 and subsequently with Fmoc-glycine according to RP-02.

**HPLC trace of crude reaction mixture 20b (Analytical RP-HPLC, Method-I)**

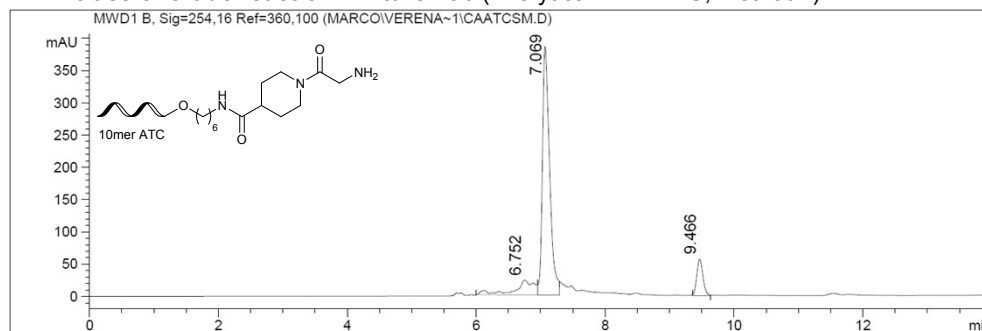

Peak list:

| Ret. Time | Width min | Height  | Area     | Area % |
|-----------|-----------|---------|----------|--------|
| 6.752     | 0.347     | 22.790  | 474.446  | 12.437 |
| 7.069     | 0.128     | 386.304 | 2969.422 | 77.837 |
| 9.466     | 0.109     | 56.642  | 371.053  | 9.726  |

**MALDI-MS spectrum of crude reaction mixture 20b**

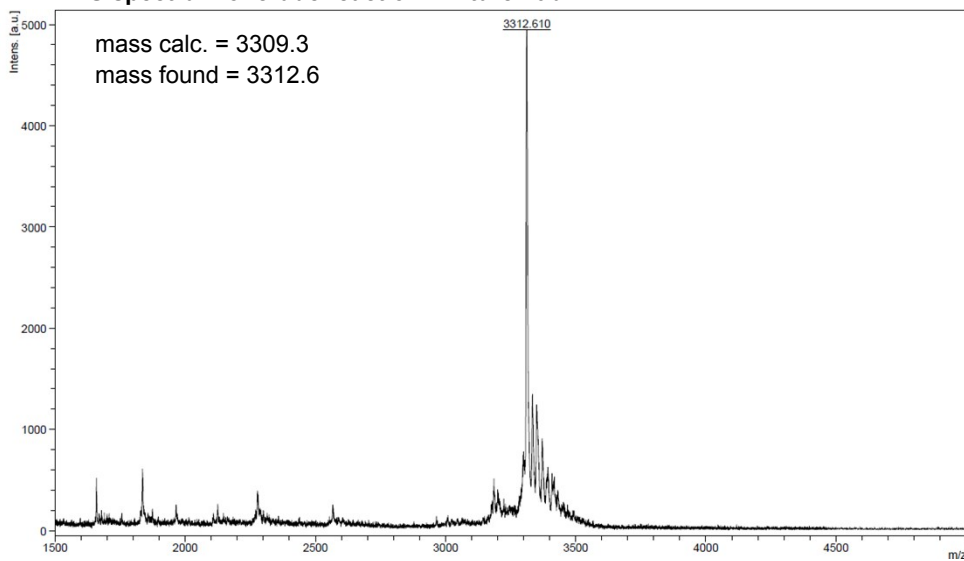

**DNA conjugate 20c:** Following DMT removal, CPG-bound ATGC-C<sub>6</sub>-NH<sub>2</sub> was reacted with 1-Fmoc-piperidine-4-carboxylic acid according to RP-01 and subsequently with Fmoc-glycine according to RP-02.

**HPLC trace of crude reaction mixture 20c (Analytical RP-HPLC, Method-I)**

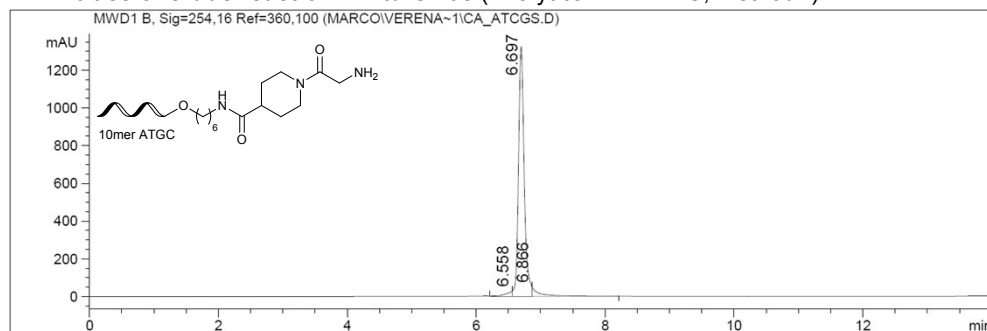

Peak list:

| Ret. Time | Width min | Height   | Area     | Area % |
|-----------|-----------|----------|----------|--------|
| 6.558     | 0.113     | 28.109   | 189.879  | 2.189  |
| 6.697     | 0.102     | 1326.277 | 8087.587 | 93.226 |
| 6.866     | 0.136     | 48.641   | 397.785  | 4.585  |

**MALDI-MS spectrum of crude reaction mixture 20c**

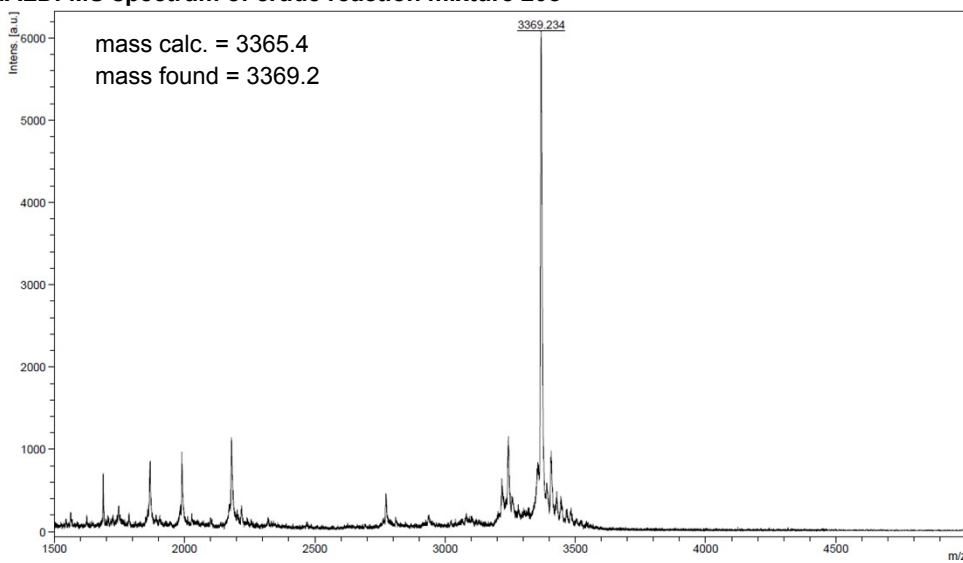

**DNA conjugate 20d:** Following DMT removal, CPG-bound ATGC-C<sub>6</sub>-NH<sub>2</sub> was reacted with 1-Fmoc-piperidine-4-carboxylic acid according to RP-01 and subsequently with Fmoc-glycine according to RP-02.

**HPLC trace of crude reaction mixture 20d (Analytical RP-HPLC, Method-II)**

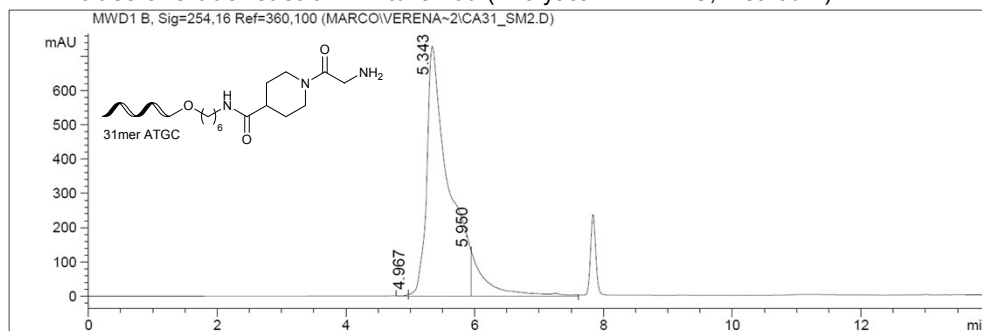

Peak list:

| Ret. Time | Width min | Height  | Area      | Area % |
|-----------|-----------|---------|-----------|--------|
| 4.967     | 0.057     | 3.956   | 13.489    | 0.071  |
| 5.343     | 0.388     | 728.580 | 16961.625 | 89.245 |
| 5.950     | 0.264     | 128.350 | 2030.550  | 10.684 |

**MALDI-MS spectrum of crude reaction mixture 20d**

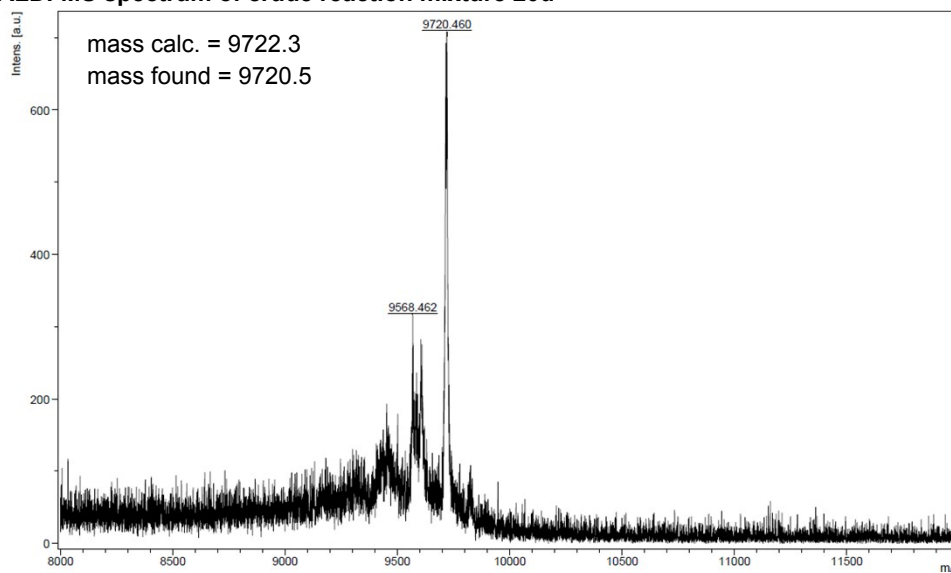

## Products of 1,3-dipolar cycloaddition on CPG-bound oligonucleotides

**DNA conjugate 23a:** CPG-bound hexT-aldehyde conjugate **20a** was reacted with benzaldehyde **21a** and *N,N*-dimethylacrylamide **22a** according to RP-04.

### HPLC trace of crude reaction mixture 23a (Analytical RP-HPLC, Method-I)

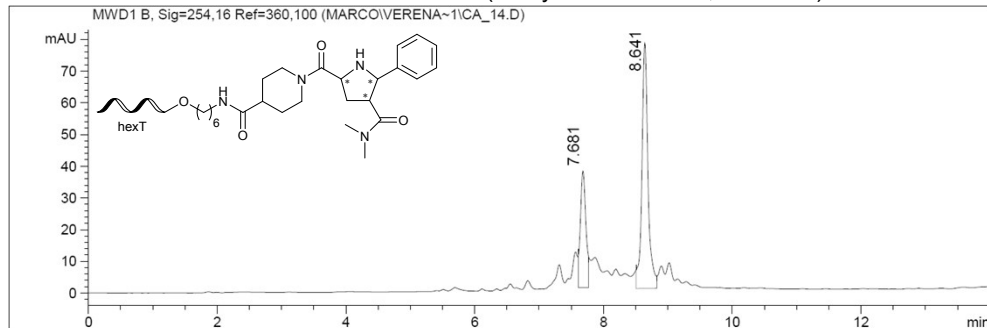

Peak list:

| Ret. Time | Width min | Height | Area    | Area % |
|-----------|-----------|--------|---------|--------|
| 7.681     | 0.098     | 36.972 | 216.657 | 30.022 |
| 8.641     | 0.108     | 77.644 | 505.000 | 69.978 |

### HPLC trace of isolated product 23a (Analytical RP-HPLC, Method-I)

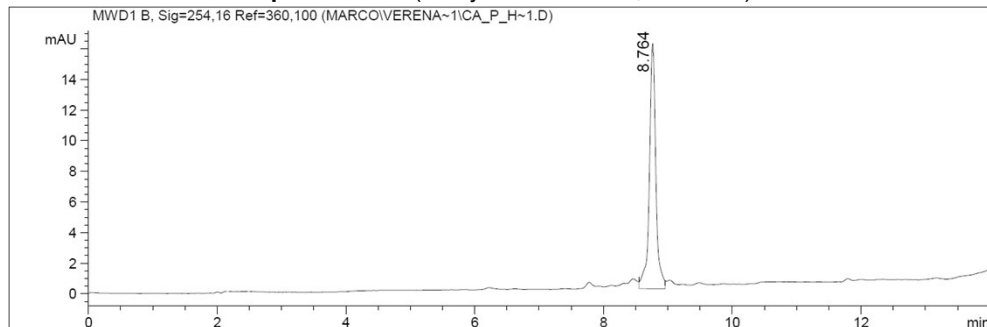

Peak list:

| Ret. Time | Width min | Height | Area    | Area %  |
|-----------|-----------|--------|---------|---------|
| 8.764     | 0.116     | 16.033 | 111.293 | 100.000 |

### MALDI-MS spectrum of isolated product 23a

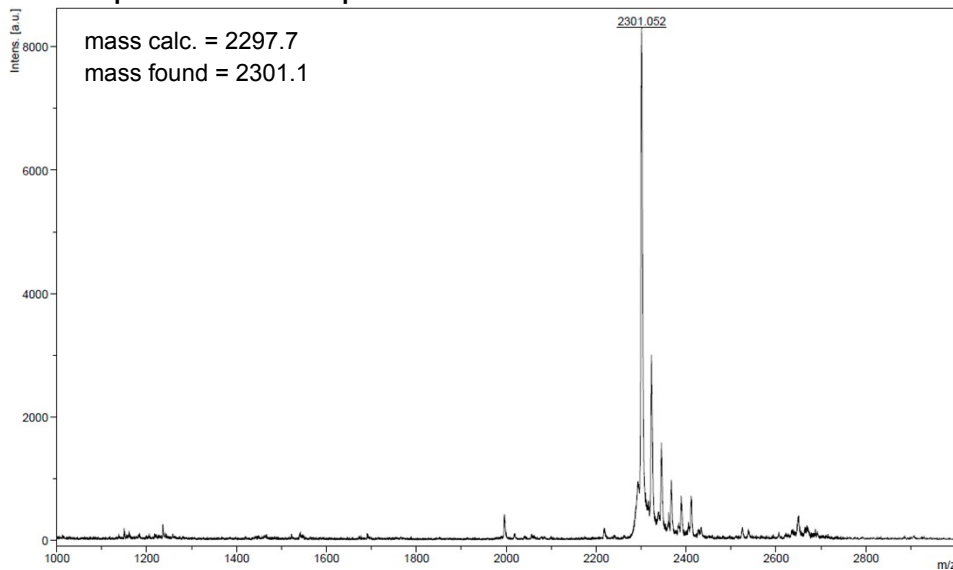

**DNA conjugate 24a:** CPG-bound 10mer ATC-aldehyde conjugate **20b** was reacted with benzaldehyde **21a** and *N,N*-dimethylacrylamide **22a** according to RP-04.

**HPLC trace of crude reaction mixture 24a (Analytical RP-HPLC, Method-I)**

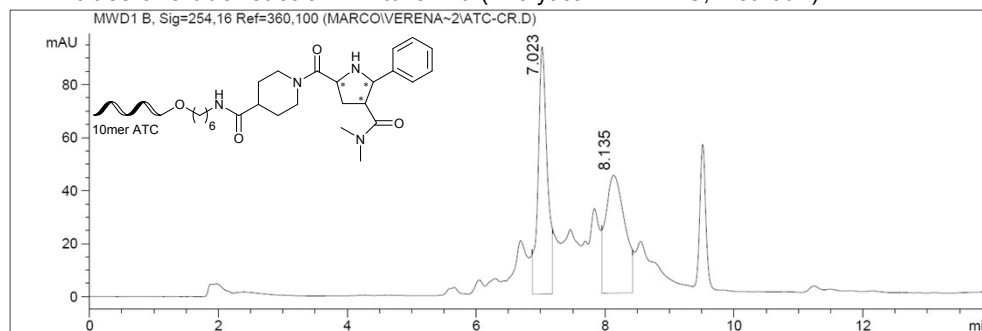

Peak list:

| Ret. Time | Width min | Height | Area    | Area % |
|-----------|-----------|--------|---------|--------|
| 7.023     | 0.163     | 93.485 | 912.917 | 49.929 |
| 8.135     | 0.343     | 44.504 | 915.518 | 50.071 |

**HPLC trace of isolated product 24a (Analytical RP-HPLC, Method-I)**

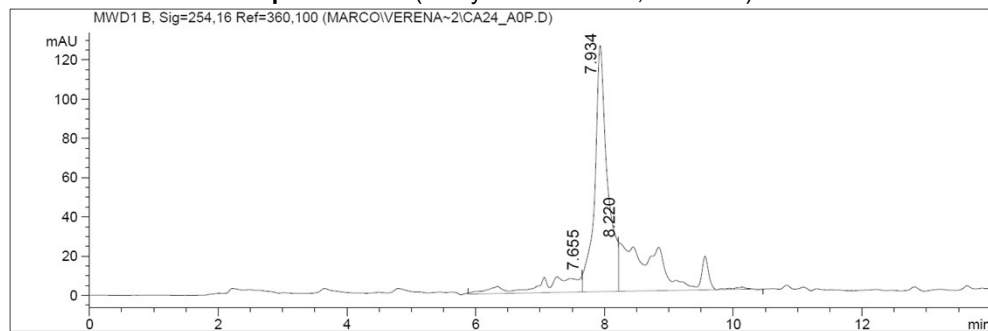

Peak list:

| Ret. Time | Width min | Height  | Area     | Area % |
|-----------|-----------|---------|----------|--------|
| 7.655     | 0.701     | 8.792   | 369.922  | 11.700 |
| 7.934     | 0.229     | 125.606 | 1725.164 | 54.563 |
| 8.220     | 0.709     | 25.069  | 1066.726 | 33.738 |

**MALDI-MS spectrum of isolated product 24a**

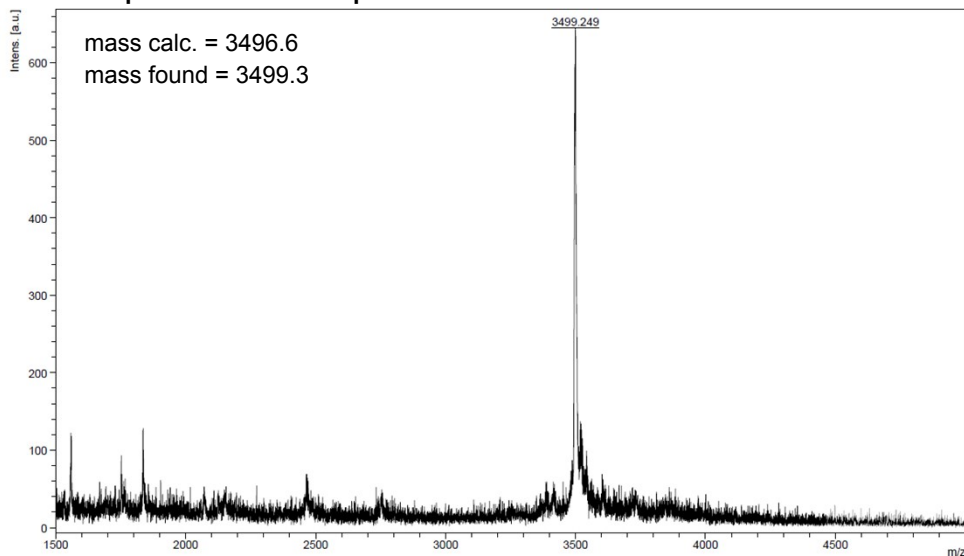

**DNA conjugate 25a:** CPG-bound 10mer ATGC-aldehyde conjugate **20c** was reacted with benzaldehyde **21a** and *N,N*-dimethylacrylamide **22a** according to RP-04.

**HPLC trace of crude reaction mixture 25a (Analytical RP-HPLC, Method-I)**

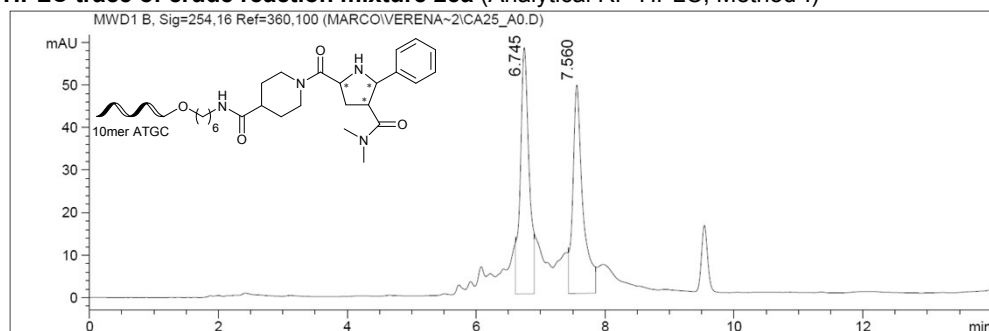

Peak list:

| Ret. Time | Width min | Height | Area    | Area % |
|-----------|-----------|--------|---------|--------|
| 6.745     | 0.157     | 57.984 | 547.737 | 50.801 |
| 7.560     | 0.180     | 49.041 | 530.466 | 49.199 |

**HPLC trace of isolated product 25a (Analytical RP-HPLC, Method-I)**

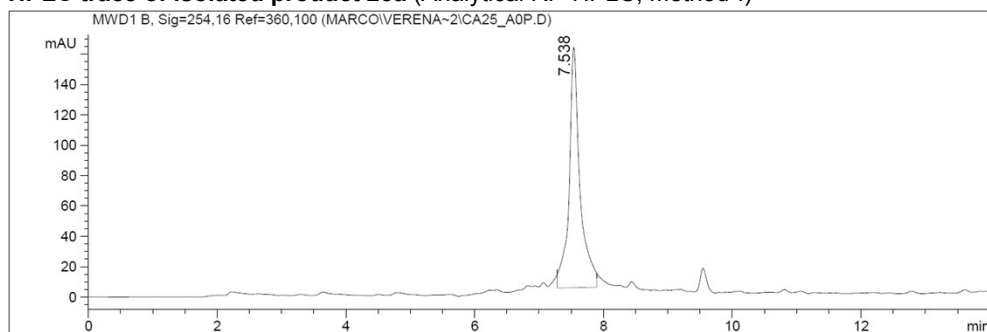

Peak list:

| Ret. Time | Width min | Height  | Area     | Area %  |
|-----------|-----------|---------|----------|---------|
| 7.538     | 0.196     | 158.621 | 1862.320 | 100.000 |

**MALDI-MS spectrum of isolated product 25a**

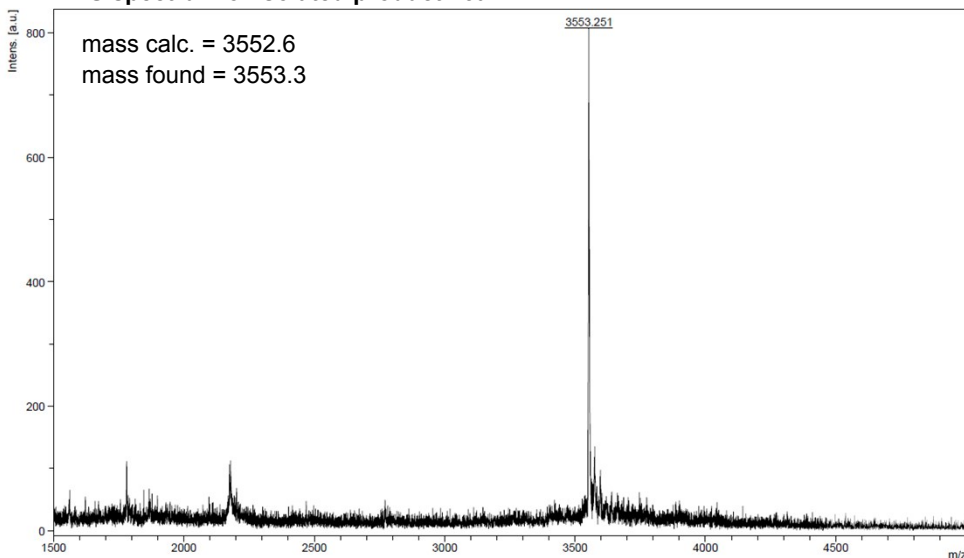

**DNA conjugate 26a:** CPG-bound 31mer ATGC-aldehyde conjugate **20d** was reacted with benzaldehyde **21a** and *N,N*-dimethylacrylamide **22a** according to RP-04.

**HPLC trace of crude reaction mixture 26a (Analytical RP-HPLC, Method-II)**

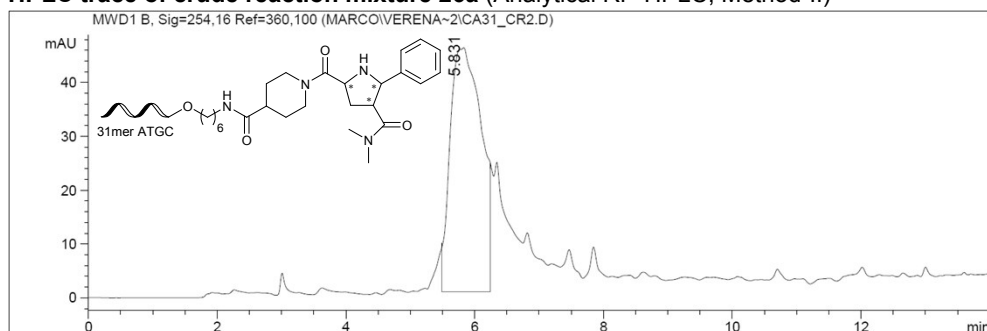

Peak list:

| Ret. Time | Width min | Height | Area     | Area %  |
|-----------|-----------|--------|----------|---------|
| 5.831     | 0.560     | 45.354 | 1525.251 | 100.000 |

**HPLC trace of crude reaction mixture 26a (Preparative RP-HPLC)**

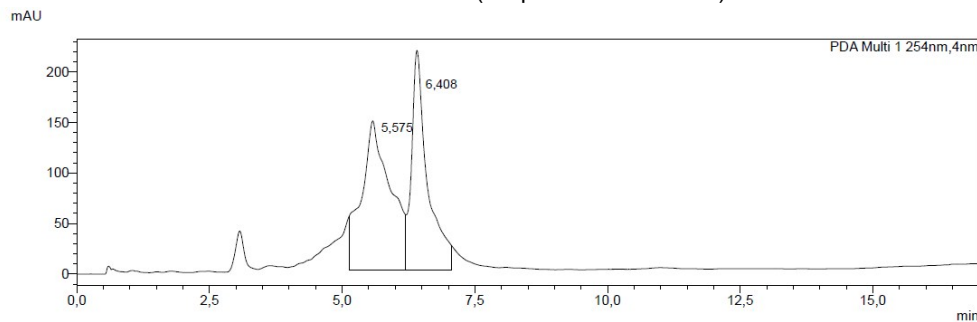

Peak Table

| PDA Ch1 254nm |           |          |         |
|---------------|-----------|----------|---------|
| Peak#         | Ret. Time | Area     | Area%   |
| 1             | 5.575     | 5505738  | 55.205  |
| 2             | 6.408     | 4516294  | 44.795  |
| Total         |           | 10082032 | 100.000 |

**MALDI-MS spectrum of crude reaction mixture 26a**

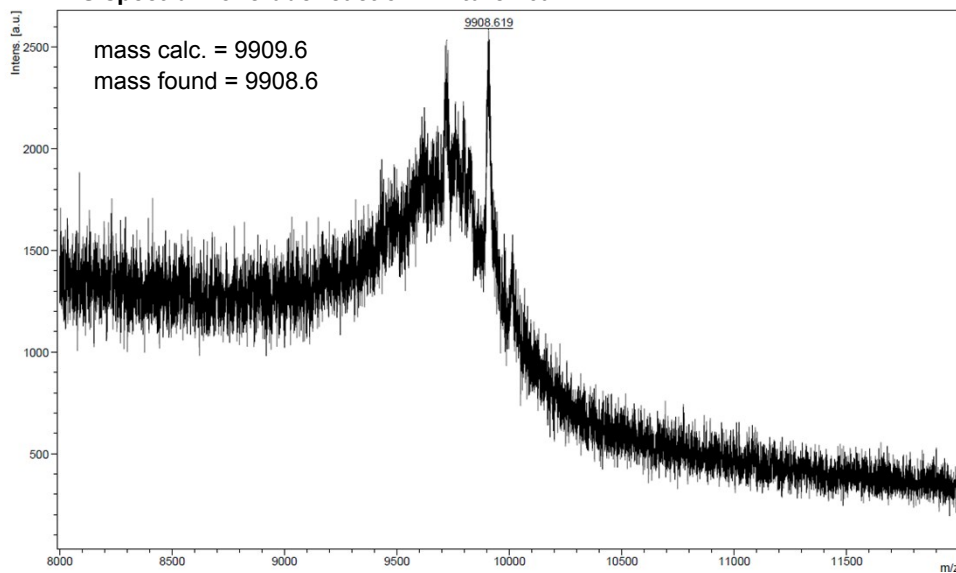



**DNA conjugate 25b:** CPG-bound 10mer ATGC-aldehyde conjugate **20c** was reacted with 4-bromobenzaldehyde **21b** and *N,N*-dimethylacrylamide **22a** according to RP-04.

**HPLC trace of crude reaction mixture 25b (Analytical RP-HPLC, Method-I)**

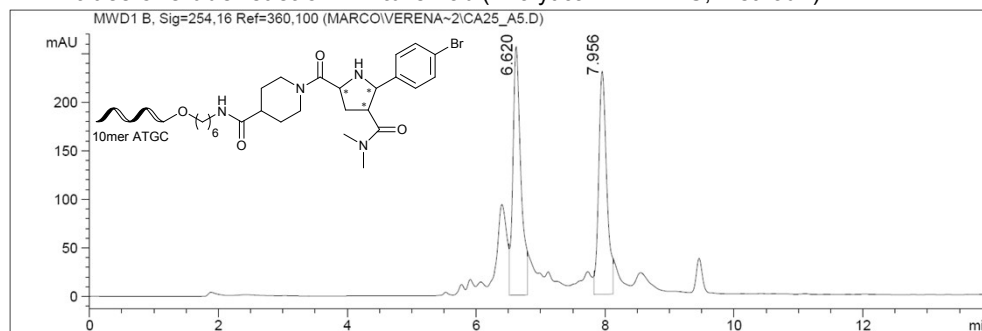

Peak list:

| Ret. Time | Width min | Height  | Area     | Area % |
|-----------|-----------|---------|----------|--------|
| 6.620     | 0.142     | 256.333 | 2189.740 | 52.390 |
| 7.956     | 0.144     | 229.900 | 1989.920 | 47.610 |

**HPLC trace of isolated product 25b (Analytical RP-HPLC, Method-I)**

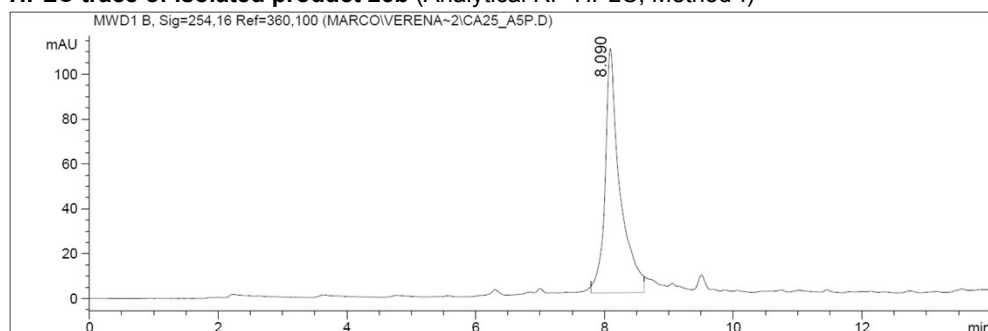

Peak list:

| Ret. Time | Width min | Height  | Area     | Area %  |
|-----------|-----------|---------|----------|---------|
| 8.090     | 0.267     | 109.030 | 1745.680 | 100.000 |

**MALDI-MS spectrum of isolated product 25b**

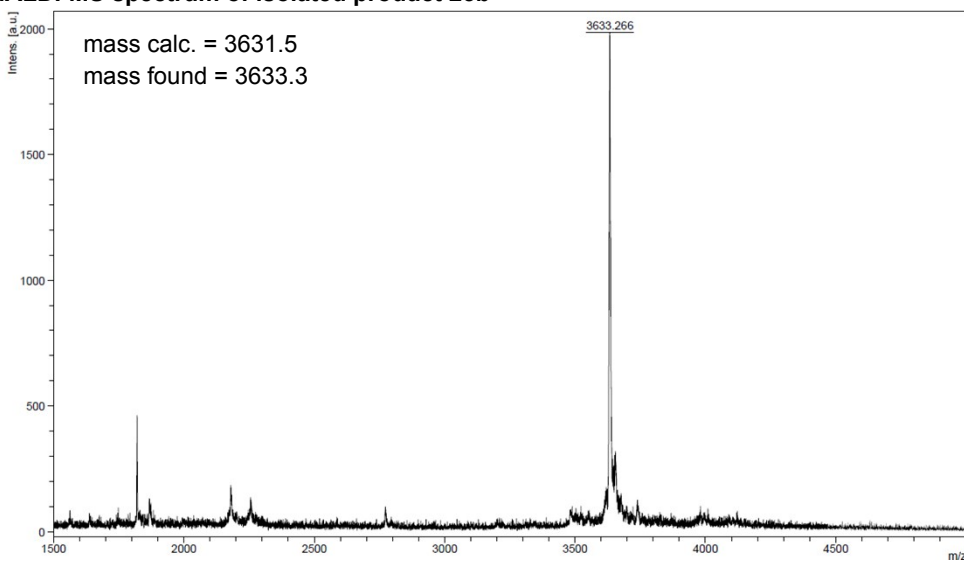

**DNA conjugate 25c:** CPG-bound 10mer ATGC-aldehyde conjugate **20c** was reacted with 4-chlorobenzaldehyde **21c** and *N,N*-dimethylacrylamide **22a** according to RP-04.

**HPLC trace of crude reaction mixture 25c (Analytical RP-HPLC, Method-I)**

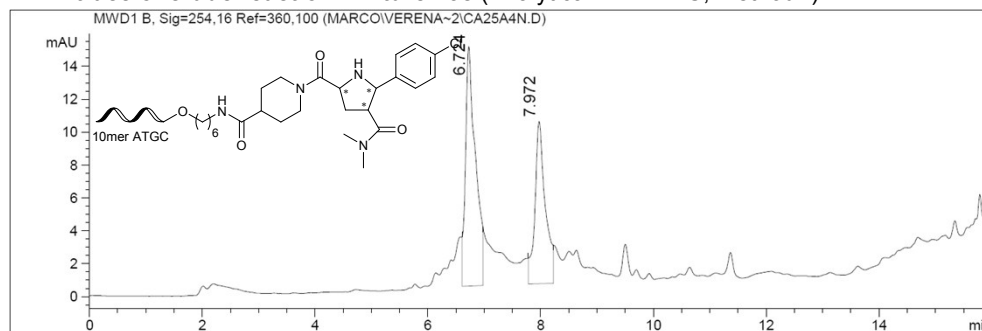

Peak list:

| Ret. Time | Width min | Height | Area    | Area % |
|-----------|-----------|--------|---------|--------|
| 6.724     | 0.205     | 14.574 | 179.067 | 58.672 |
| 7.972     | 0.213     | 9.881  | 126.132 | 41.328 |

**HPLC trace of isolated product 25c (Analytical RP-HPLC, Method-I)**

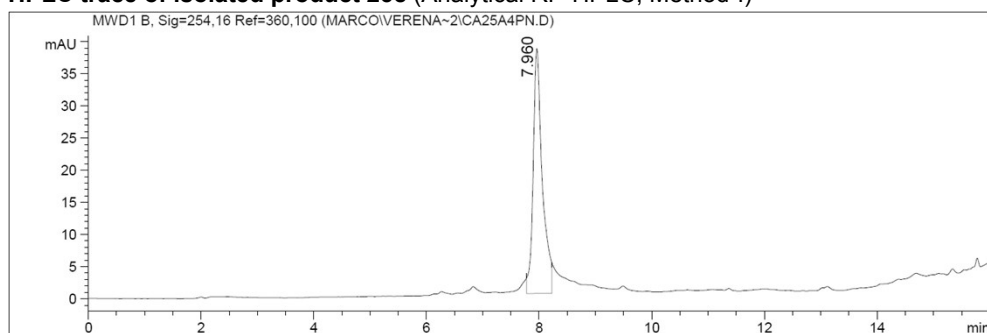

Peak list:

| Ret. Time | Width min | Height | Area    | Area %  |
|-----------|-----------|--------|---------|---------|
| 7.960     | 0.188     | 38.136 | 429.028 | 100.000 |

**MALDI-MS spectrum of isolated product 25c**

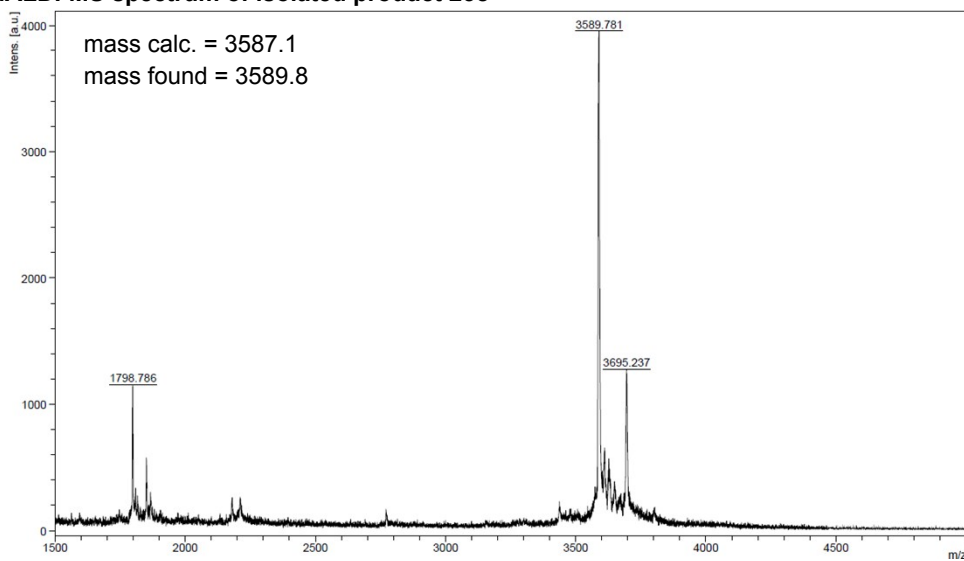

**DNA conjugate 25d:** CPG-bound 10mer ATGC-aldehyde conjugate **20c** was reacted with 4-fluorobenzaldehyde **21d** and *N,N*-dimethylacrylamide **22a** according to RP-04.

**HPLC trace of crude reaction mixture 25d (Analytical RP-HPLC, Method-I)**

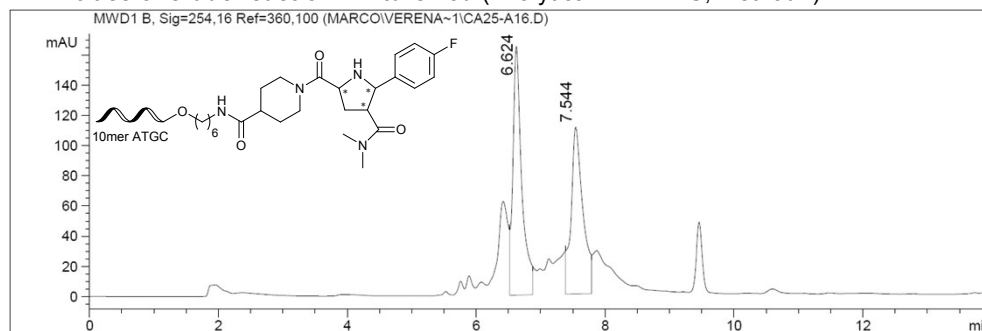

Peak list:

| Ret. Time | Width min | Height  | Area     | Area % |
|-----------|-----------|---------|----------|--------|
| 6.624     | 0.159     | 164.699 | 1567.480 | 52.693 |
| 7.544     | 0.212     | 110.556 | 1407.250 | 47.307 |

**HPLC trace of isolated product 25d (Analytical RP-HPLC, Method-I)**

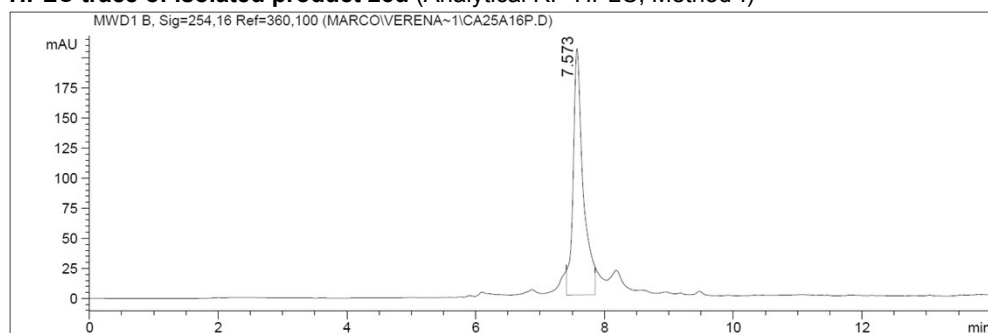

Peak list:

| Ret. Time | Width min | Height  | Area     | Area %  |
|-----------|-----------|---------|----------|---------|
| 7.573     | 0.178     | 204.819 | 2191.556 | 100.000 |

**MALDI-MS spectrum of isolated product 25d**

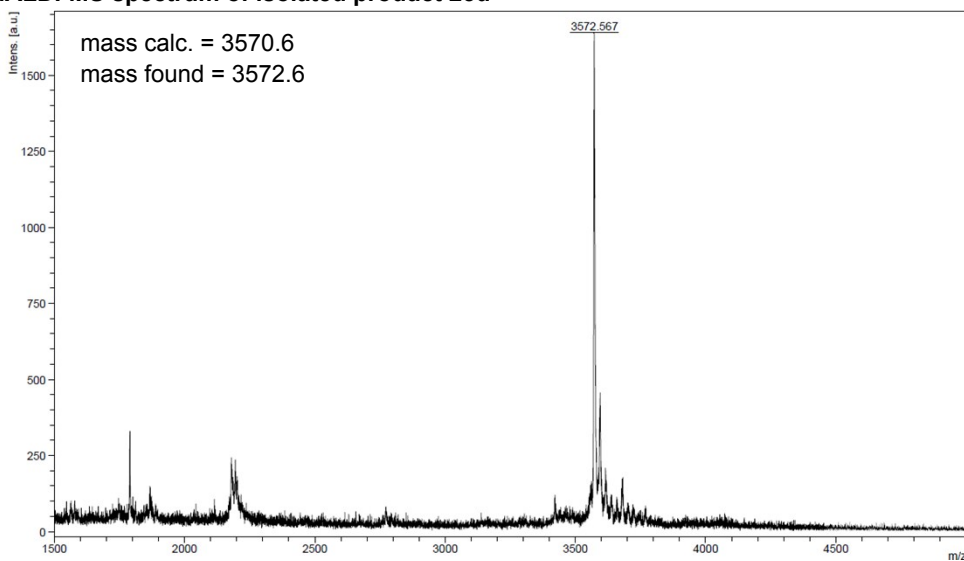

**DNA conjugate 25e:** CPG-bound 10mer ATGC-aldehyde conjugate **20c** was reacted with 4-methoxybenzaldehyde **21e** and *N,N*-dimethylacrylamide **22a** according to RP-04.

**HPLC trace of crude reaction mixture 25e (Analytical RP-HPLC, Method-I)**

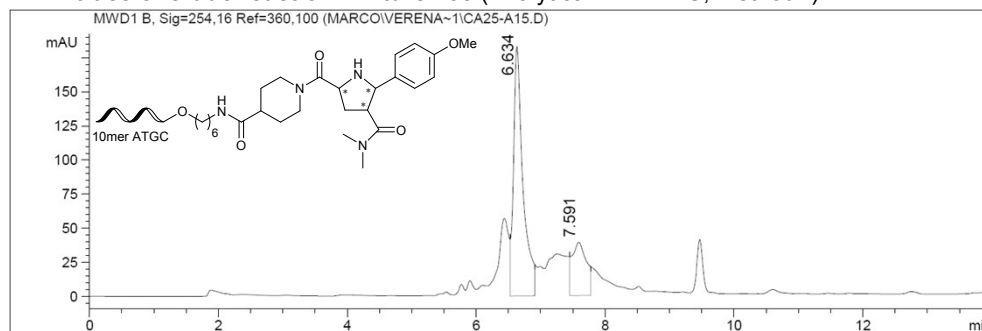

Peak list:

| Ret. Time | Width min | Height  | Area     | Area % |
|-----------|-----------|---------|----------|--------|
| 6.634     | 0.170     | 183.070 | 1864.126 | 75.702 |
| 7.591     | 0.255     | 39.070  | 598.326  | 24.298 |

**HPLC trace of isolated product 25e (Analytical RP-HPLC, Method-I)**

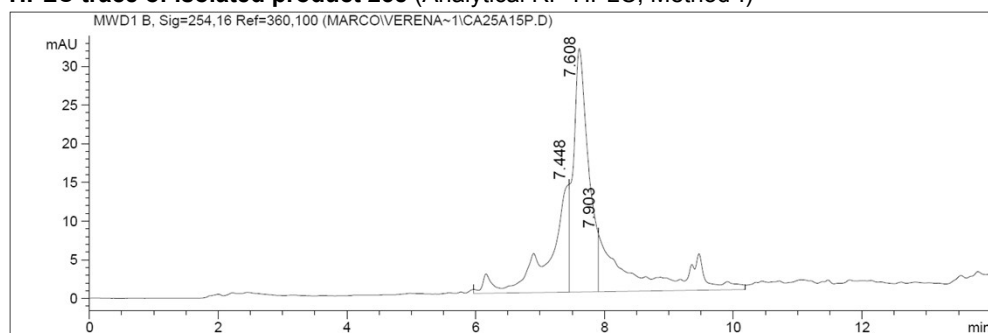

Peak list:

| Ret. Time | Width min | Height | Area    | Area % |
|-----------|-----------|--------|---------|--------|
| 7.448     | 0.366     | 13.906 | 305.698 | 27.798 |
| 7.608     | 0.268     | 31.476 | 506.568 | 46.064 |
| 7.903     | 0.630     | 7.609  | 287.447 | 26.138 |

**MALDI-MS spectrum of isolated product 25e**

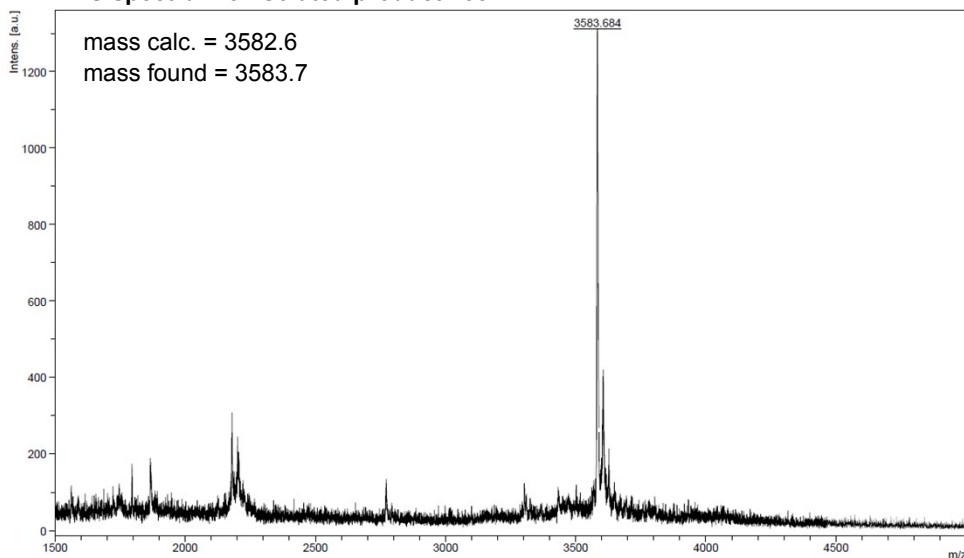

**DNA conjugate 25f:** CPG-bound 10mer ATGC-aldehyde conjugate **20c** was reacted with 4-*tert*-butylbenzaldehyde **21f** and *N,N*-dimethylacrylamide **22a** according to RP-04.

**HPLC trace of crude reaction mixture 25f (Analytical RP-HPLC, Method-I)**

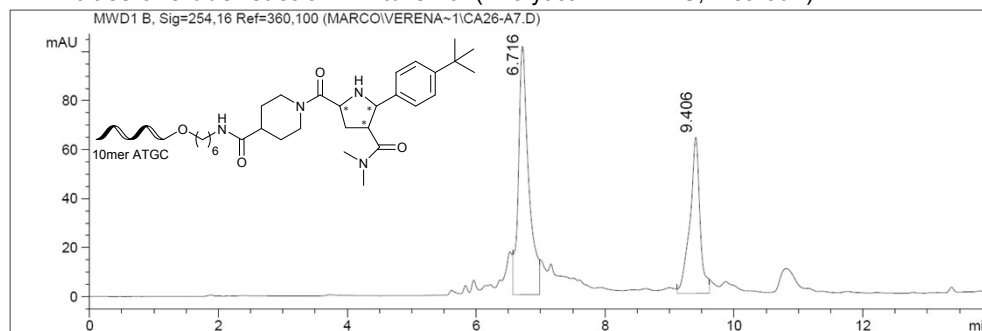

Peak list:

| Ret. Time | Width min | Height  | Area     | Area % |
|-----------|-----------|---------|----------|--------|
| 6.716     | 0.186     | 101.417 | 1130.862 | 62.256 |
| 9.406     | 0.179     | 63.725  | 685.621  | 37.744 |

**HPLC trace of isolated product 25f (Analytical RP-HPLC, Method-I)**

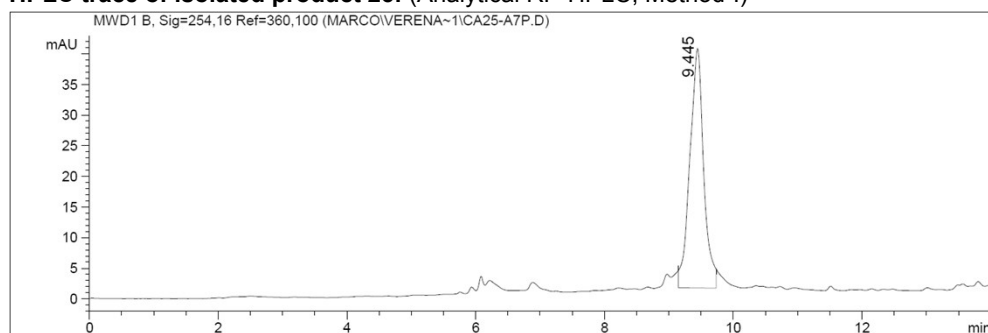

Peak list:

| Ret. Time | Width min | Height | Area    | Area %  |
|-----------|-----------|--------|---------|---------|
| 9.445     | 0.248     | 39.097 | 581.896 | 100.000 |

**MALDI-MS spectrum of isolated product 25f**

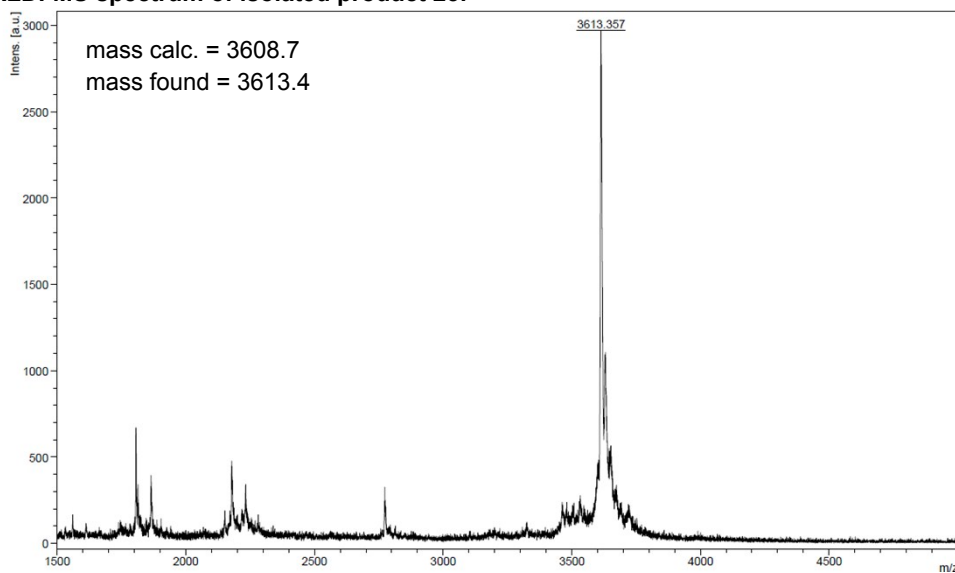

**DNA conjugate 25g:** CPG-bound 10mer ATGC-aldehyde conjugate **20c** was reacted with 4-ethynylbenzaldehyde **21g** and *N,N*-dimethylacrylamide **22a** according to RP-04.

**HPLC trace of crude reaction mixture 25g (Analytical RP-HPLC, Method-I)**

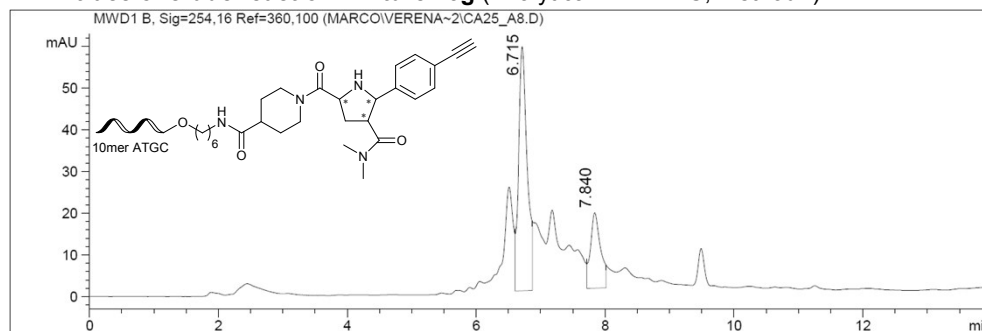

Peak list:

| Ret. Time | Width min | Height | Area    | Area % |
|-----------|-----------|--------|---------|--------|
| 6.715     | 0.155     | 58.577 | 545.278 | 73.632 |
| 7.840     | 0.180     | 18.108 | 195.268 | 26.368 |

**HPLC trace of isolated product 25g (Analytical RP-HPLC, Method-I)**

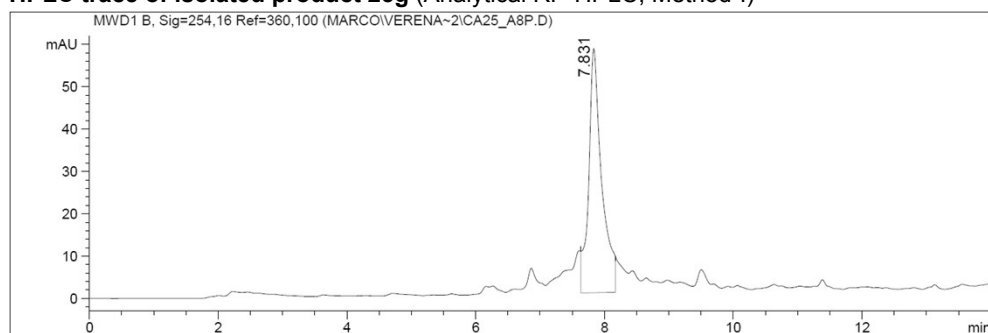

Peak list:

| Ret. Time | Width min | Height | Area    | Area %  |
|-----------|-----------|--------|---------|---------|
| 7.831     | 0.234     | 57.706 | 808.712 | 100.000 |

**MALDI-MS spectrum of isolated product 25g**

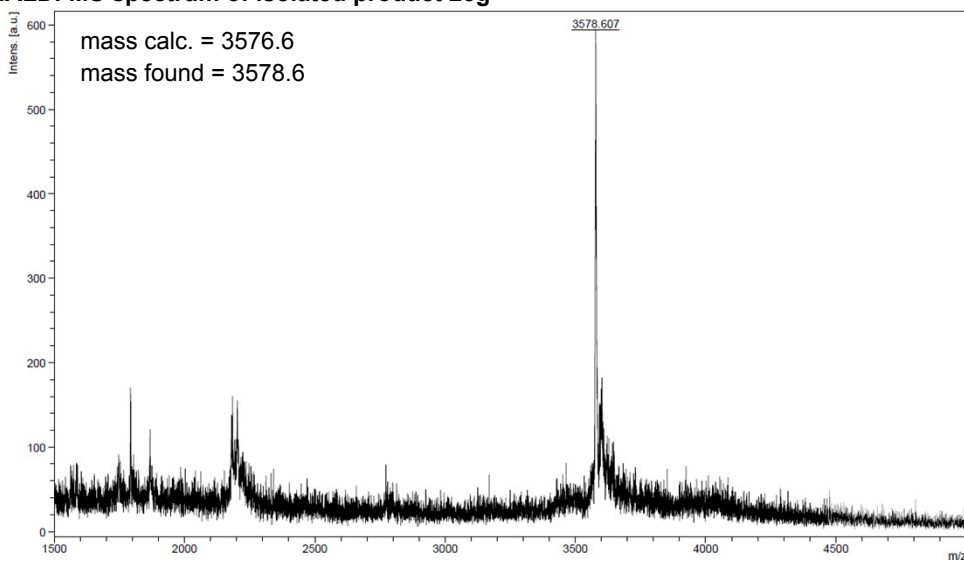

**DNA conjugate 25h:** CPG-bound 10mer ATGC-aldehyde conjugate **20c** was reacted with 4-formylbenzonitrile **21h** and *N,N*-dimethylacrylamide **22a** according to RP-04.

**HPLC trace of crude reaction mixture 25h (Analytical RP-HPLC, Method-I)**

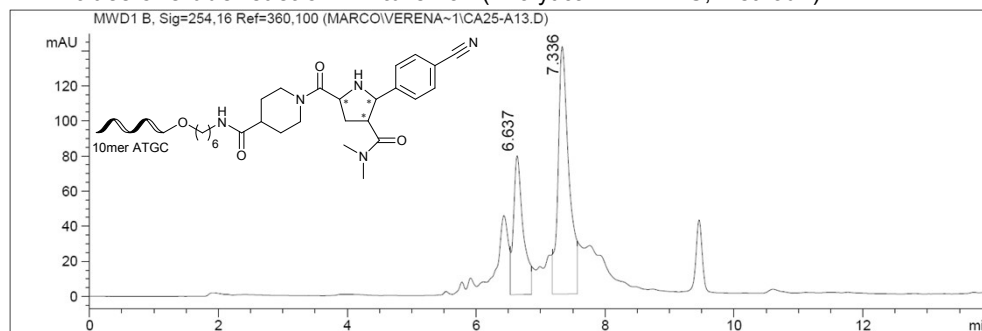

Peak list:

| Ret. Time | Width min | Height  | Area     | Area % |
|-----------|-----------|---------|----------|--------|
| 6.637     | 0.174     | 79.215  | 828.028  | 33.236 |
| 7.336     | 0.197     | 141.059 | 1663.362 | 66.764 |

**HPLC trace of isolated product 25h (Analytical RP-HPLC, Method-I)**

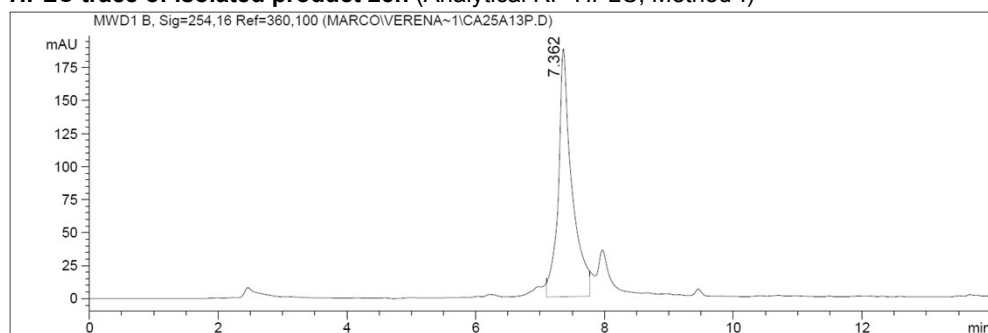

Peak list:

| Ret. Time | Width min | Height  | Area     | Area %  |
|-----------|-----------|---------|----------|---------|
| 7.362     | 0.242     | 188.094 | 2734.618 | 100.000 |

**MALDI-MS spectrum of isolated product 25h**

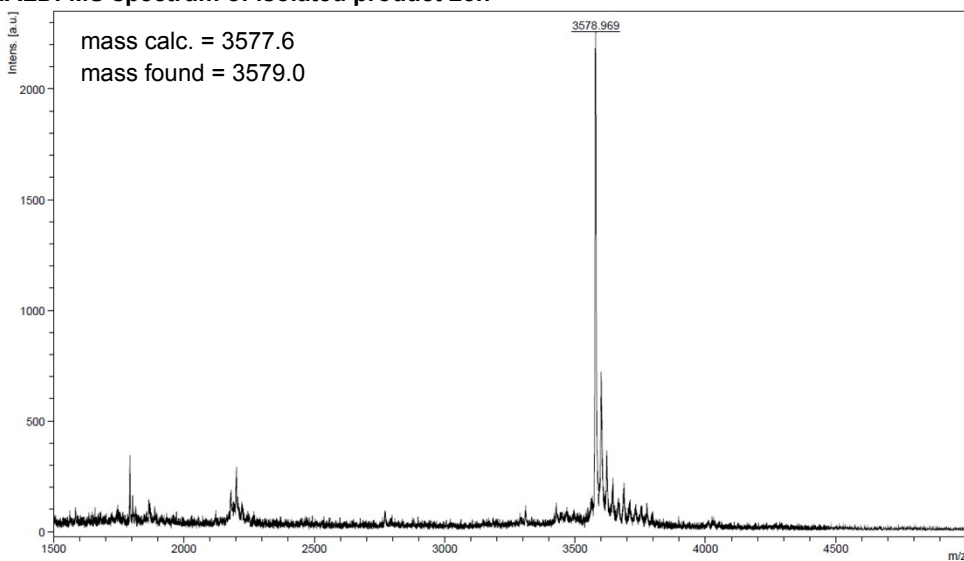

**DNA conjugate 25i:** CPG-bound 10mer ATGC-aldehyde conjugate **20c** was reacted with biphenyl-4-carboxaldehyde **21i** and *N,N*-dimethylacrylamide **22a** according to RP-04.

**HPLC trace of crude reaction mixture 25i (Analytical RP-HPLC, Method-I)**

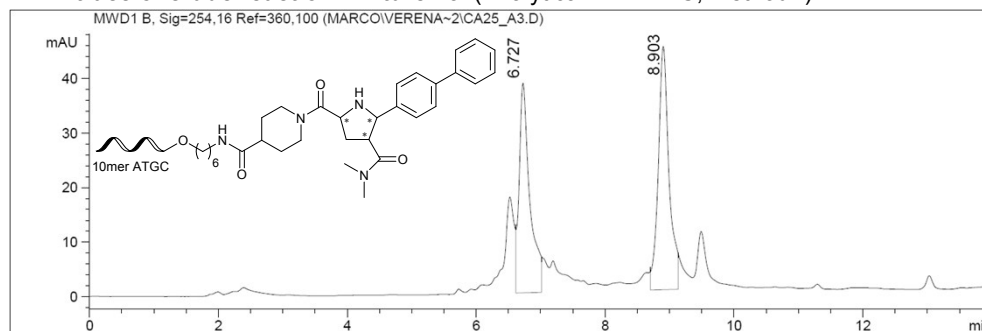

Peak list:

| Ret. Time | Width min | Height | Area    | Area % |
|-----------|-----------|--------|---------|--------|
| 6.727     | 0.191     | 38.479 | 441.614 | 46.180 |
| 8.903     | 0.192     | 44.631 | 514.677 | 53.820 |

**HPLC trace of isolated product 25i (Analytical RP-HPLC, Method-I)**

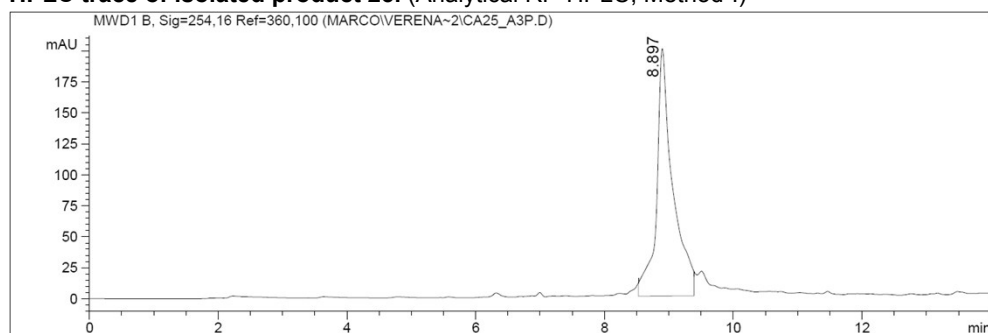

Peak list:

| Ret. Time | Width min | Height  | Area     | Area %  |
|-----------|-----------|---------|----------|---------|
| 8.897     | 0.290     | 199.680 | 3479.585 | 100.000 |

**MALDI-MS spectrum of isolated product 25i**

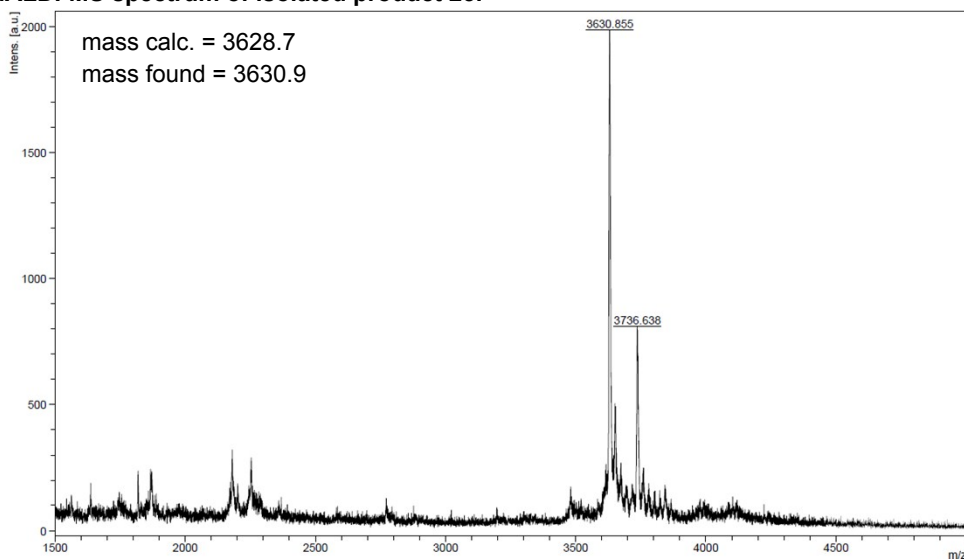



**DNA conjugate 25j:** CPG-bound 10mer ATGC-aldehyde conjugate **20c** was reacted with 4-pyridin-4-ylbenzaldehyde **21j** and *N,N*-dimethylacrylamide **22a** according to RP-04.

**HPLC trace of crude reaction mixture 25j (Analytical RP-HPLC, Method-I)**

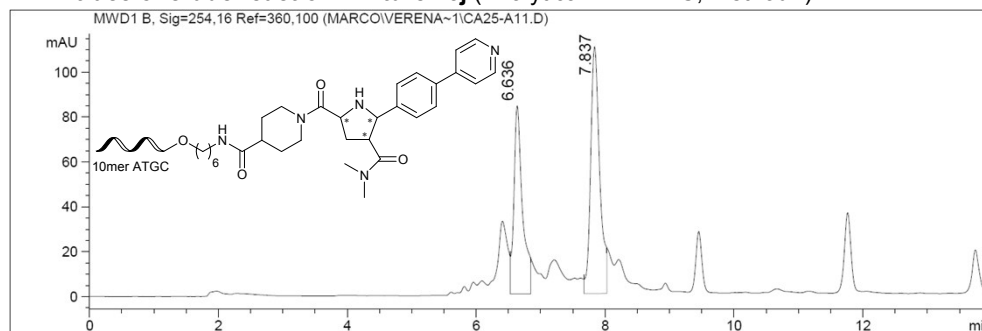

Peak list:

| Ret. Time | Width min | Height  | Area     | Area % |
|-----------|-----------|---------|----------|--------|
| 6.636     | 0.153     | 84.040  | 771.274  | 41.742 |
| 7.837     | 0.163     | 110.072 | 1076.442 | 58.258 |

**HPLC trace of isolated product 25j (Analytical RP-HPLC, Method-I)**

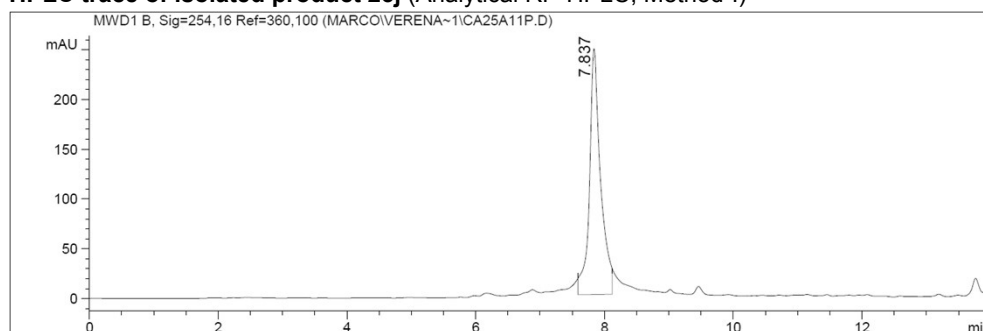

Peak list:

| Ret. Time | Width min | Height  | Area     | Area %  |
|-----------|-----------|---------|----------|---------|
| 7.837     | 0.202     | 247.394 | 2999.225 | 100.000 |

**MALDI-MS spectrum of isolated product 25j**

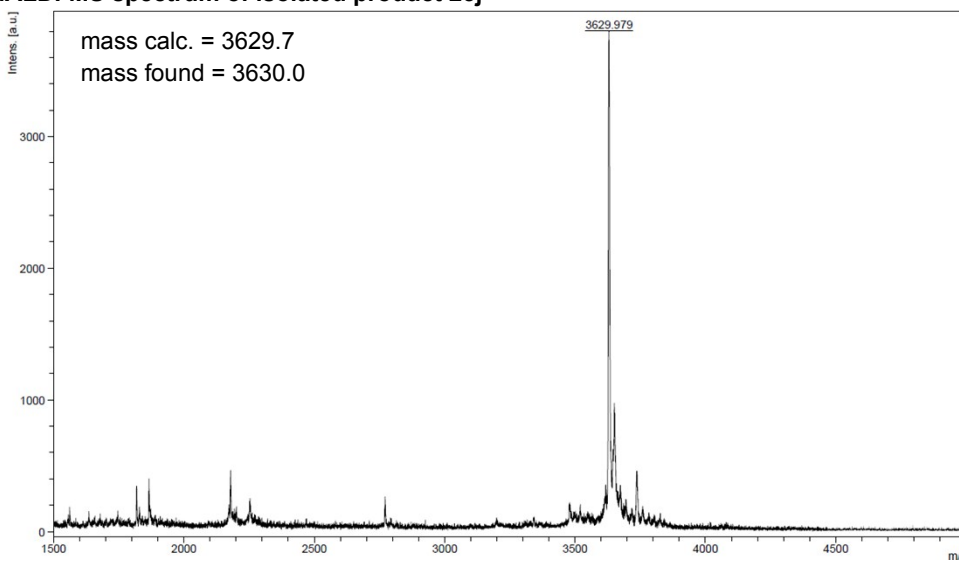

**DNA conjugate 25k:** CPG-bound 10mer ATGC-aldehyde conjugate **20c** was reacted with 2-phenylmethoxybenzaldehyde **21k** and *N,N*-dimethylacrylamide **22a** according to RP-04.

**HPLC trace of crude reaction mixture 25k (Analytical RP-HPLC, Method-I)**

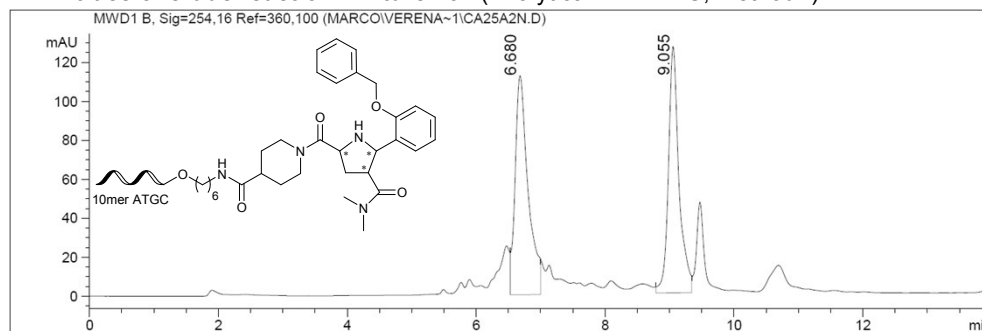

Peak list:

| Ret. Time | Width min | Height  | Area     | Area % |
|-----------|-----------|---------|----------|--------|
| 6.680     | 0.233     | 112.505 | 1572.313 | 51.919 |
| 9.055     | 0.192     | 126.566 | 1456.082 | 48.081 |

**HPLC trace of isolated product 25k (Analytical RP-HPLC, Method-I)**

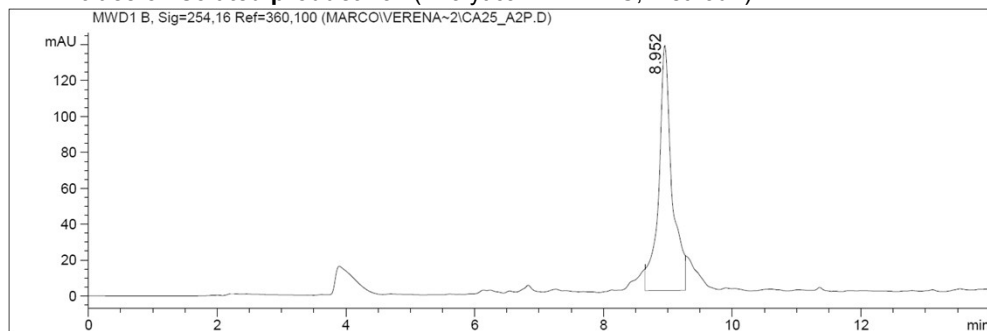

Peak list:

| Ret. Time | Width min | Height  | Area     | Area %  |
|-----------|-----------|---------|----------|---------|
| 8.952     | 0.238     | 136.650 | 1947.764 | 100.000 |

**MALDI-MS spectrum of isolated product 25k**

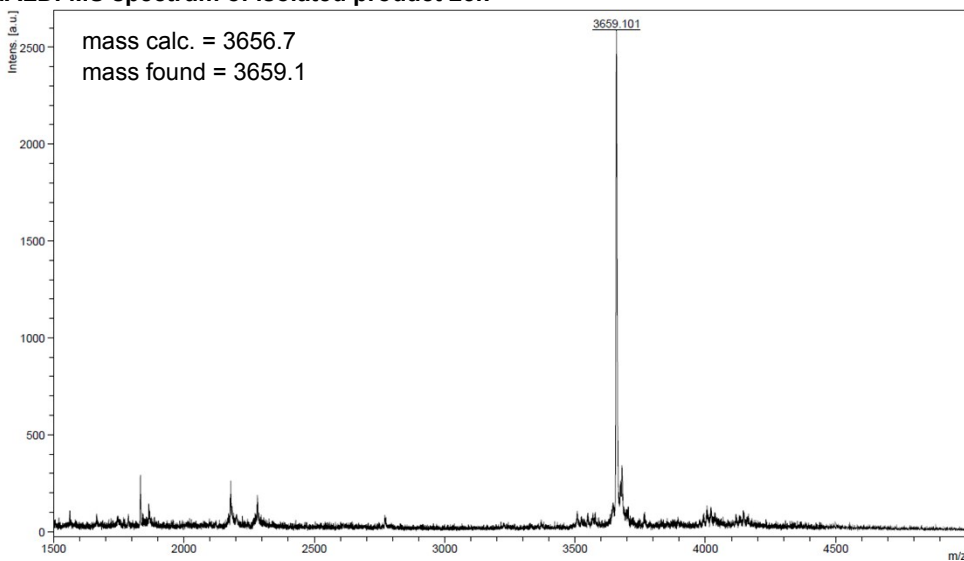

**DNA conjugate 25I:** CPG-bound 10mer ATGC-aldehyde conjugate **20c** was reacted with 1,3-benzodioxole-5-carbaldehyde **21I** and *N,N*-dimethylacrylamide **22a** according to RP-04.

**HPLC trace of crude reaction mixture 25I (Analytical RP-HPLC, Method-I)**

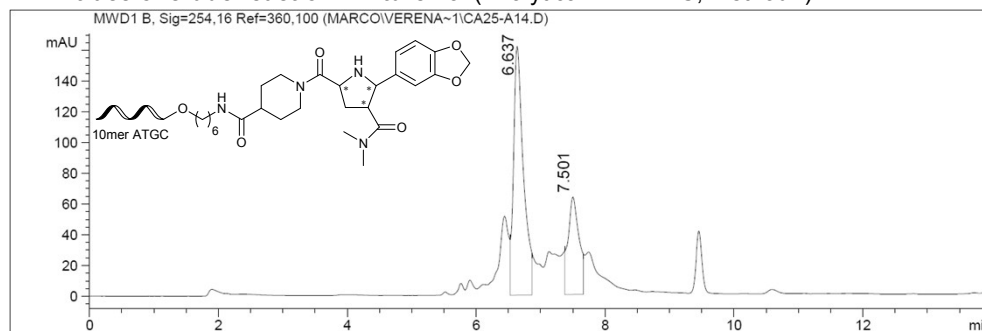

Peak list:

| Ret. Time | Width min | Height  | Area     | Area % |
|-----------|-----------|---------|----------|--------|
| 6.637     | 0.178     | 161.991 | 1727.826 | 69.918 |
| 7.501     | 0.195     | 63.472  | 743.381  | 30.082 |

**HPLC trace of isolated product 25I (Analytical RP-HPLC, Method-I)**

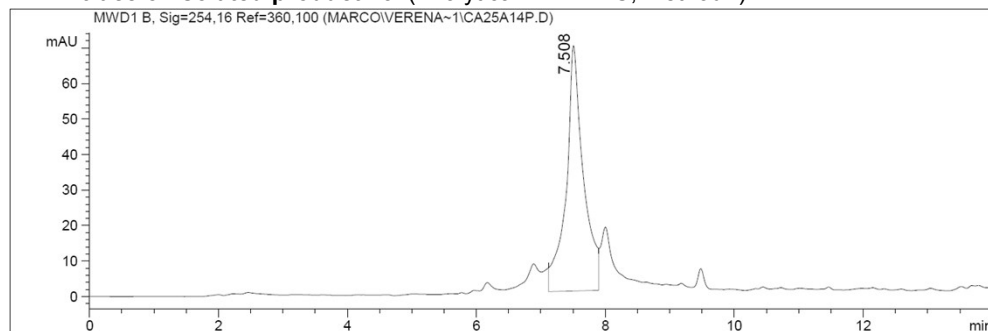

Peak list:

| Ret. Time | Width min | Height | Area     | Area %  |
|-----------|-----------|--------|----------|---------|
| 7.508     | 0.310     | 69.119 | 1284.571 | 100.000 |

**MALDI-MS spectrum of isolated product 25I**

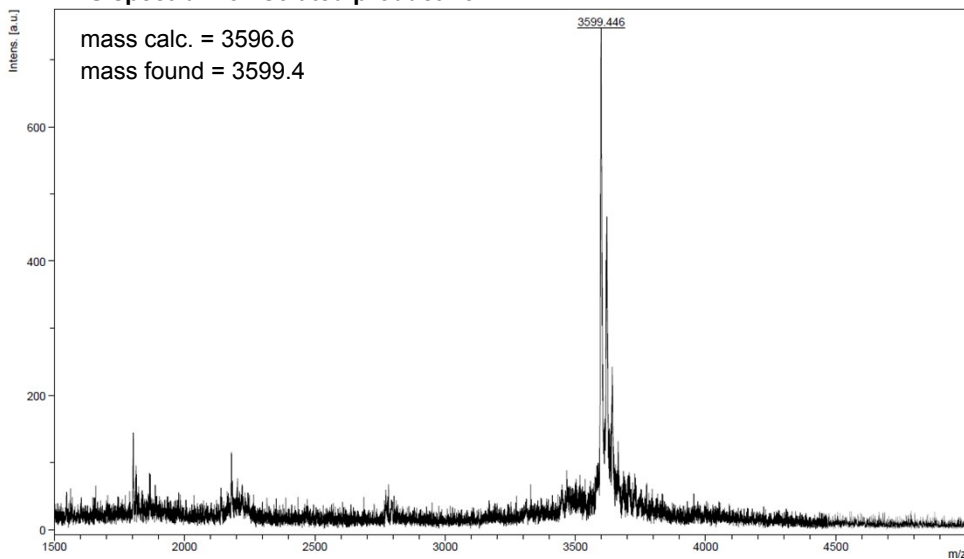

**DNA conjugate 25m:** CPG-bound 10mer ATGC-aldehyde conjugate **20c** was reacted with propanal **21m** and *N,N*-Dimethylacrylamide **22a** according to RP-04.

**HPLC trace of crude reaction mixture 25m (Analytical RP-HPLC, Method-I)**

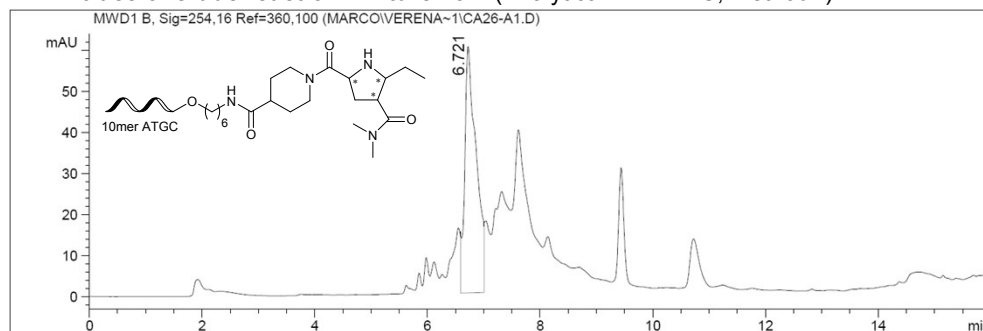

Peak list:

| Ret. Time | Width min | Height | Area    | Area %  |
|-----------|-----------|--------|---------|---------|
| 6.721     | 0.234     | 60.108 | 845.161 | 100.000 |

**MALDI-MS spectrum of crude reaction mixture 25m**

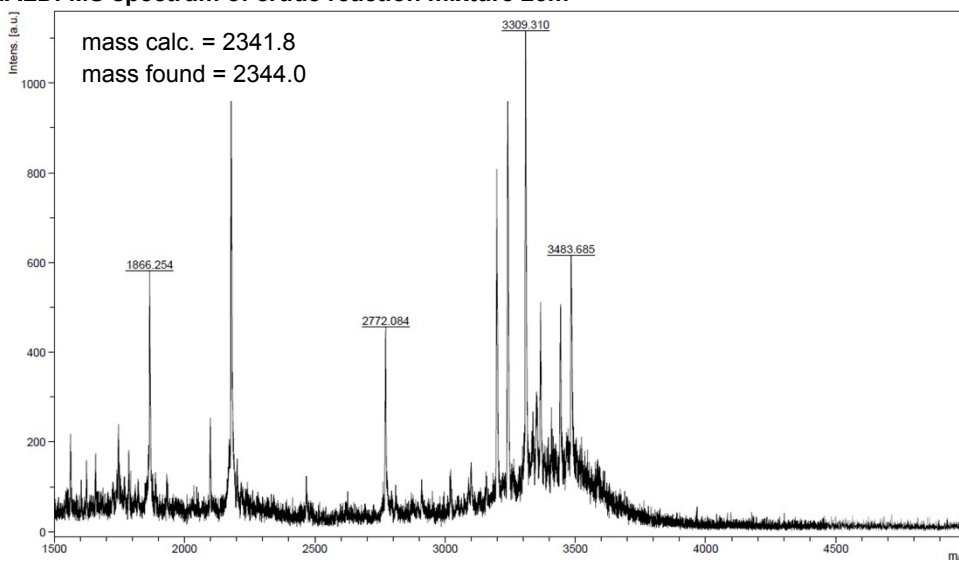

**DNA conjugate 25n:** CPG-bound 10mer ATGC-aldehyde conjugate **20c** was reacted with benzaldehyde **21a** and methyl prop-2-enoate **22b** according to RP-04.

**HPLC trace of crude reaction mixture 25n (Analytical RP-HPLC, Method-I)**

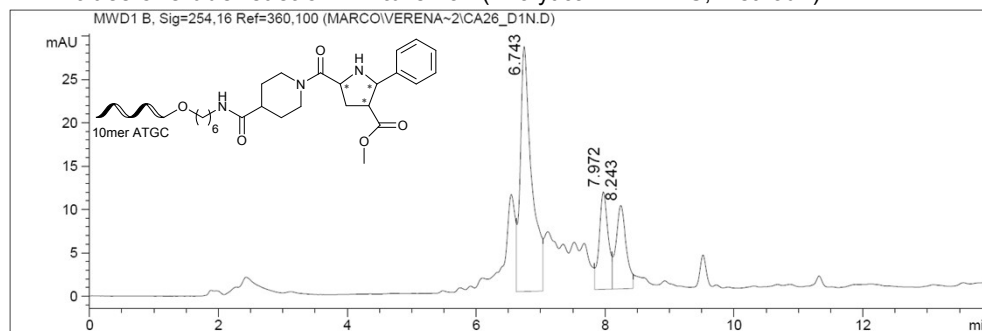

Peak list:

| Ret. Time | Width min | Height | Area    | Area % |
|-----------|-----------|--------|---------|--------|
| 6.743     | 0.208     | 28.257 | 352.390 | 62.056 |
| 7.972     | 0.162     | 11.238 | 109.190 | 19.229 |
| 8.243     | 0.184     | 9.626  | 106.275 | 18.715 |

**HPLC trace of isolated product 25n (Analytical RP-HPLC, Method-I)**

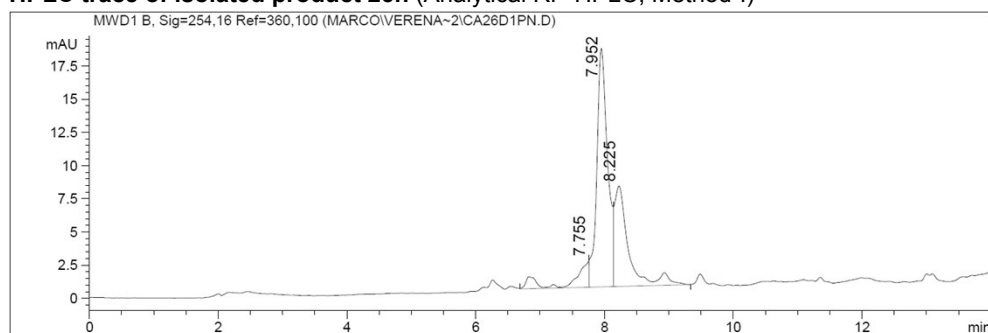

Peak list:

| Ret. Time | Width min | Height | Area    | Area % |
|-----------|-----------|--------|---------|--------|
| 7.755     | 0.278     | 1.988  | 33.168  | 9.313  |
| 7.952     | 0.193     | 17.973 | 208.665 | 58.589 |
| 8.225     | 0.252     | 7.564  | 114.320 | 32.099 |

**MALDI-MS spectrum of isolated product 25n**

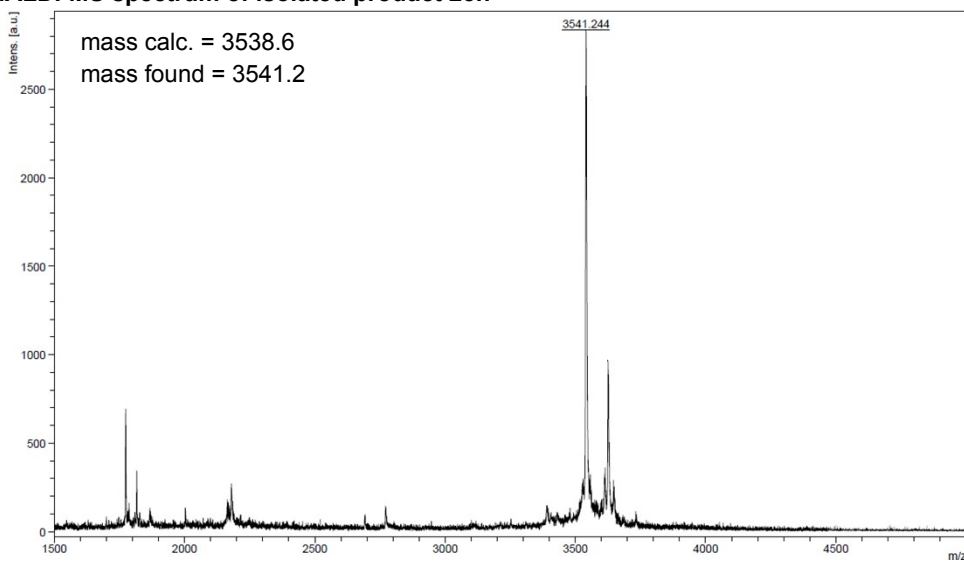

**DNA conjugate 25o:** CPG-bound 10mer ATGC-aldehyde conjugate **20c** was reacted with benzaldehyde **21a** and dimethyl (Z)-but-2-enedioate **22c** according to RP-04.

**HPLC trace of crude reaction mixture 25o (Analytical RP-HPLC, Method-I)**

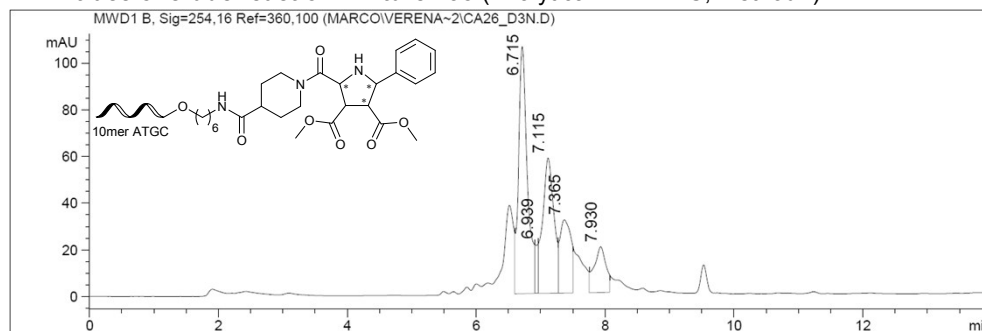

Peak list:

| Ret. Time | Width min | Height  | Area     | Area % |
|-----------|-----------|---------|----------|--------|
| 6.715     | 0.159     | 105.996 | 1010.774 | 42.032 |
| 6.939     | 0.057     | 21.404  | 72.647   | 3.021  |
| 7.115     | 0.201     | 57.967  | 699.485  | 29.087 |
| 7.365     | 0.197     | 31.390  | 370.204  | 15.395 |
| 7.930     | 0.214     | 19.632  | 251.653  | 10.465 |

**HPLC trace of isolated product 25o (Analytical RP-HPLC, Method-I)**

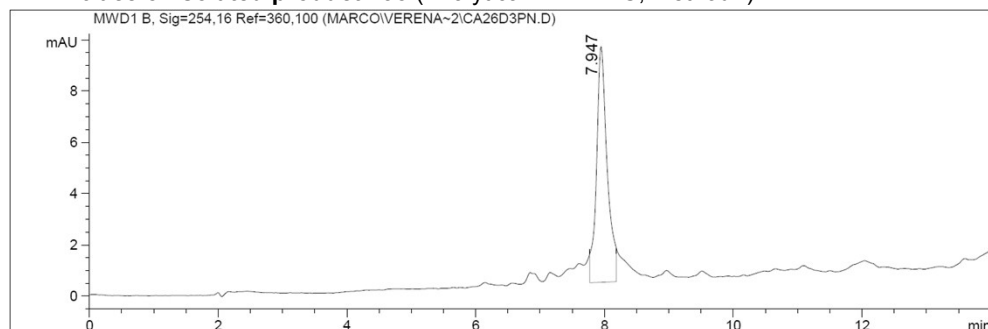

Peak list:

| Ret. Time | Width min | Height | Area    | Area %  |
|-----------|-----------|--------|---------|---------|
| 7.947     | 0.191     | 9.203  | 105.396 | 100.000 |

**MALDI-MS spectrum of isolated product 25o**

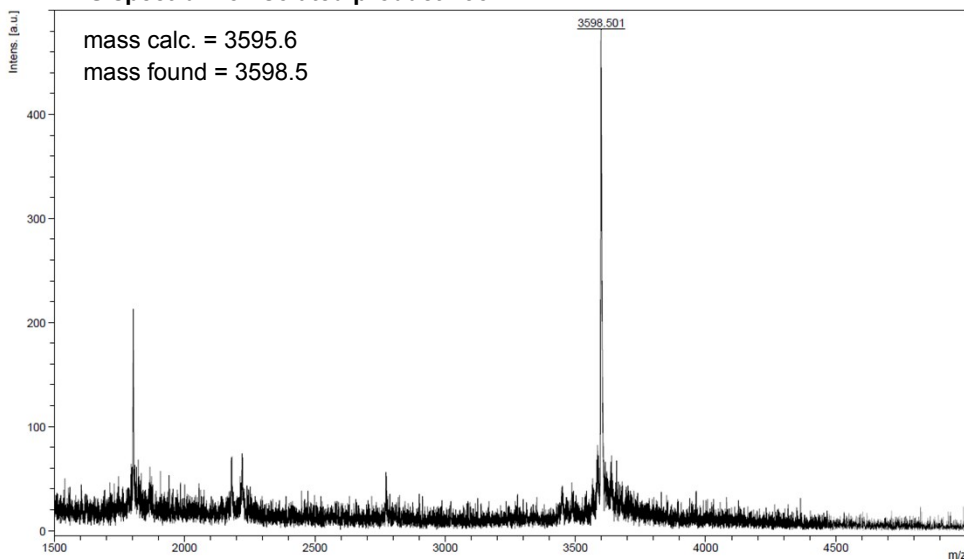

## 1,3-dipolar cycloaddition on oligonucleotides in solution

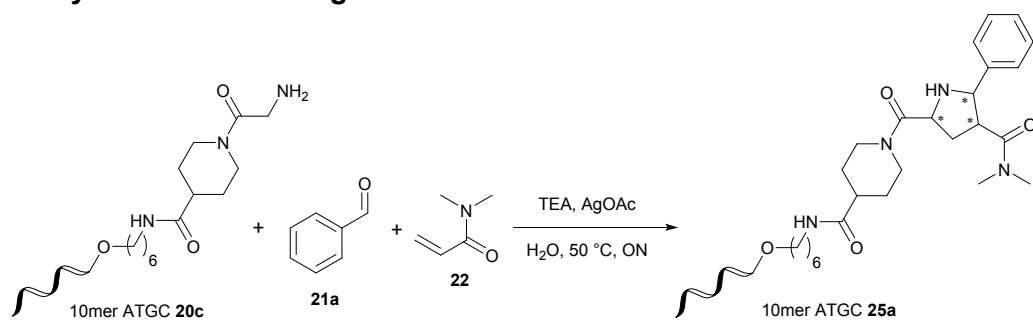

**Scheme S2** AgOAc-mediated 1,3-dipolar cycloaddition on oligonucleotides in solution.

The DNA-glycine conjugate **20c** (500 pmol), aldehyde **21a** (500 nmol, 1000 equiv.), AgOAc (50 nmol, 1000 equiv.), *N,N*-dimethylacrylamide **22** (2  $\mu\text{mol}$ , 4000 equiv.) and triethylamine (2  $\mu\text{mol}$ , 4000 equiv.) were reacted in a total volume of 50  $\mu\text{L}$  distilled water. The reaction mixture was shaken at 50  $^\circ\text{C}$  overnight. Afterwards, the mixture was diluted by adding 50  $\mu\text{L}$  distilled water and extracted 6x with 200  $\mu\text{L}$  ethyl acetate. The aqueous phase was dried *in vacuo* and the residue was re-dissolved in 30  $\mu\text{L}$  distilled water. Ethanol precipitation was performed by adding three volumes of ethanol and storing the solution at -80  $^\circ\text{C}$  overnight. Centrifugation gave a DNA pellet, the supernatant was taken off, the precipitated DNA was dried in a SpeedVac and re-dissolved in 100  $\mu\text{L}$  distilled water. A last purification step was performed by incubating the DNA conjugate with Chelex resin overnight. The supernatant was taken off, dried *in vacuo* and re-dissolved in 40  $\mu\text{L}$  distilled water for analysis.

### HPLC trace of crude reaction mixture (Analytical RP-HPLC, Method-I)

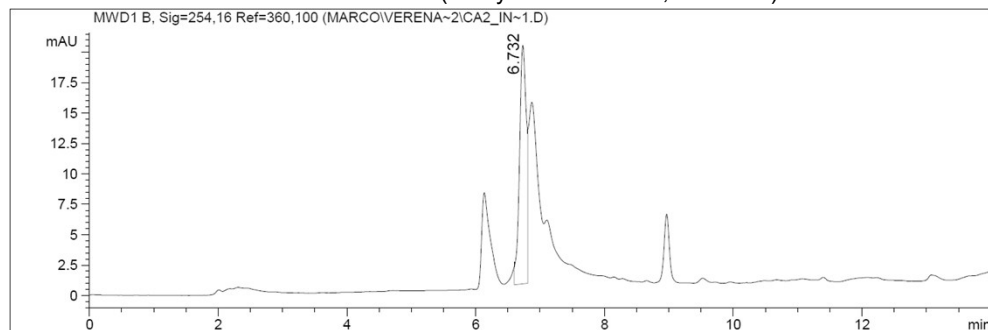

Peak list:

| Ret. Time | Width min | Height | Area    | Area %  |
|-----------|-----------|--------|---------|---------|
| 6.732     | 0.124     | 19.656 | 146.322 | 100.000 |

**MALDI-MS spectrum of crude reaction mixture**

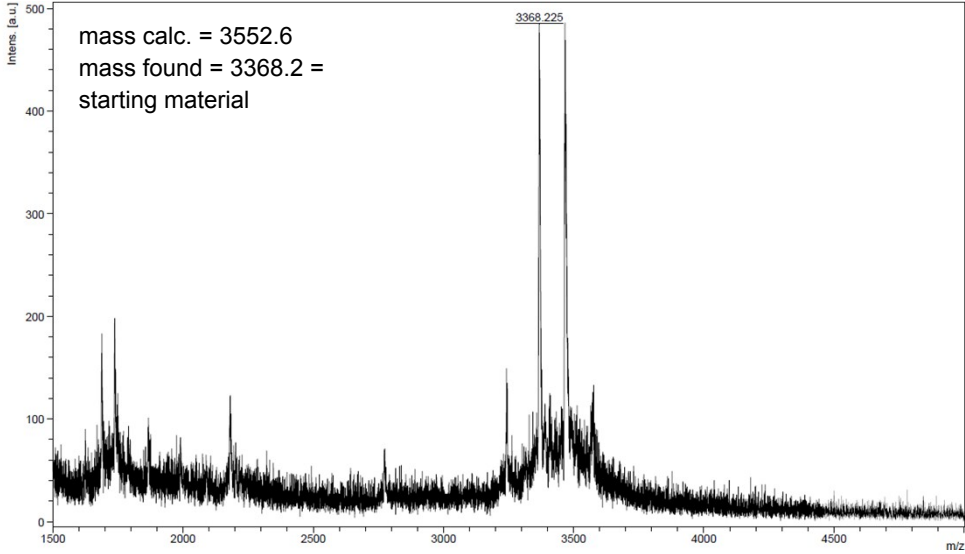



## TFA-mediated Pictet-Spengler reaction on CPG-bound oligonucleotides

**Table S5** Investigations towards TFA-mediated Pictet-Spengler reaction on CPG-bound oligonucleotides.<sup>a</sup>

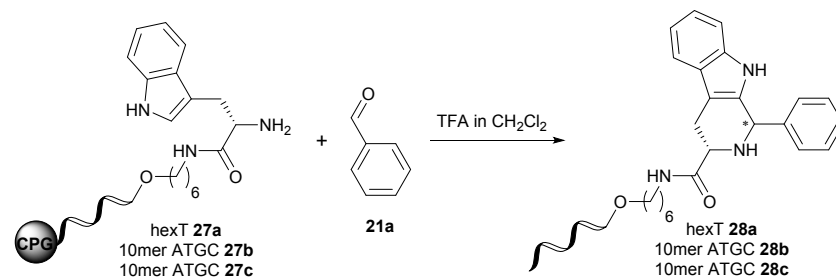

| Entry | Reaction conditions <sup>b</sup>                                                                                                                                           | HPLC trace of crude reaction mixture <sup>c</sup> | MALDI-MS of crude reaction mixture |
|-------|----------------------------------------------------------------------------------------------------------------------------------------------------------------------------|---------------------------------------------------|------------------------------------|
| 1     | <p>hexT-Trp <b>27a</b></p> <p>mass calc. = 2128.6</p> <p>mass found = 2130.9</p>                                                                                           |                                                   |                                    |
| 2     | <p>hexT-Trp <b>27a</b>, <b>10 % TFA</b></p> <p>rt, 18 h</p> <p>=&gt; yield 52 %</p> <p>=&gt; degradation &lt;5 %</p> <p>mass calc. = 2216.7</p> <p>mass found = 2219.5</p> |                                                   |                                    |

3  
 hexT-Trp **27a**, 2 % TFA  
 rt, 18 h  
 => yield 60 %  
 => degradation <5 %  
 mass calc. = 2216.7  
 mass found = 2219.4

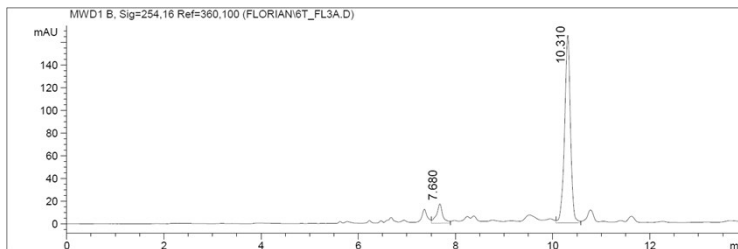

4  
 ATC-Trp **27b**  
 mass calc. = 3327.4  
 mass found = 3330.8

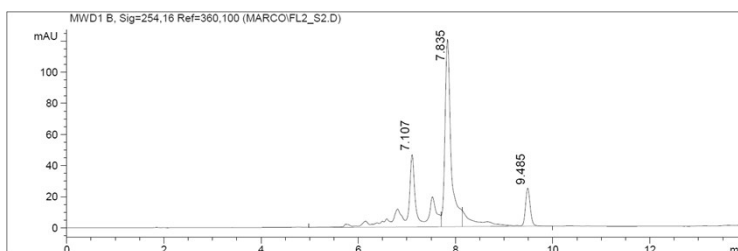

5  
 ATC-Trp **27b**, 2 % TFA  
 rt, 18 h  
 => yield = n.d.  
 => degradation >95 %  
 mass calc. = 3415.5  
 mass found = n.d.

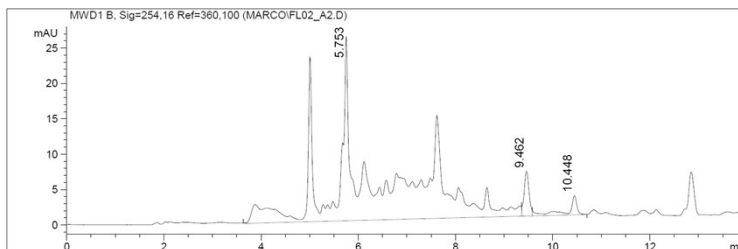

6  
 ATC-Trp **27b**, 1 % TFA  
 rt, 18 h  
 => yield = n.d.  
 => degradation >95 %  
 mass calc. = 3415.5  
 mass found = n.d.

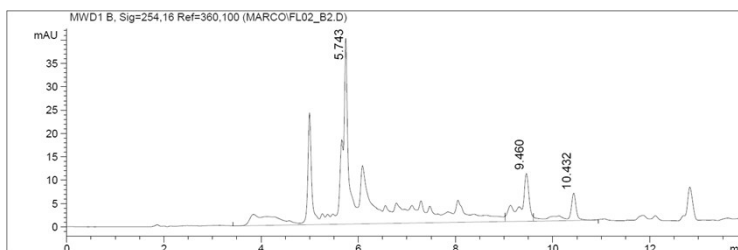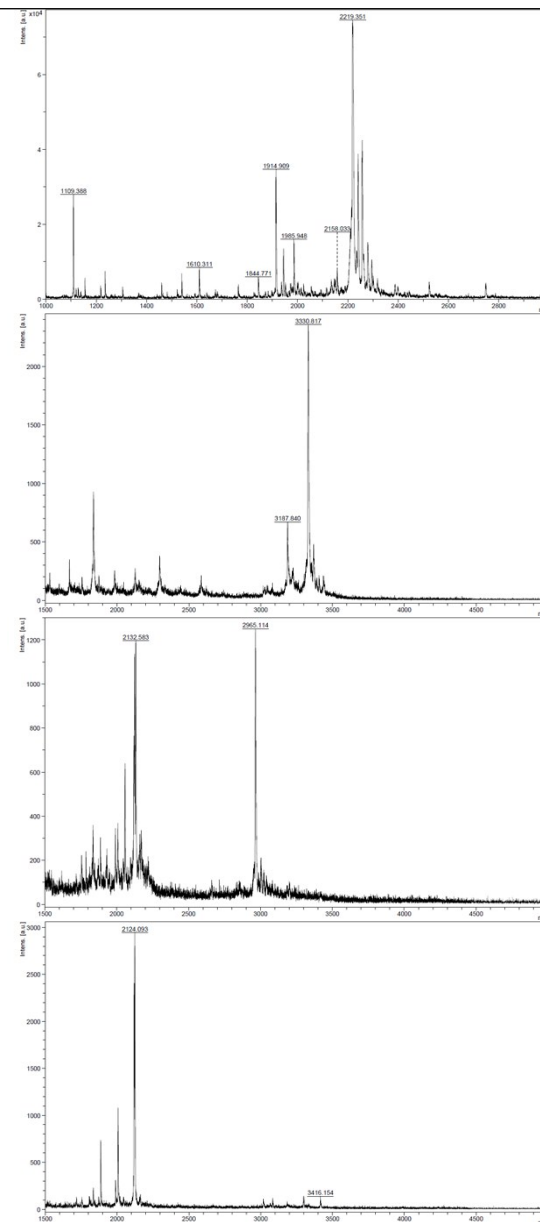

7  
 ATC-Trp **27b**, 0.5 % TFA  
 rt, 18 h  
 => yield 17 %  
 => degradation 73%  
 mass calc. = 3415.5  
 mass found = 3415.6

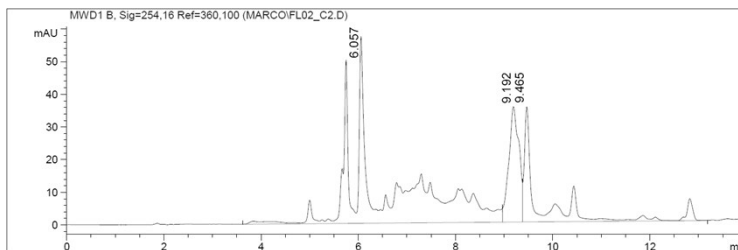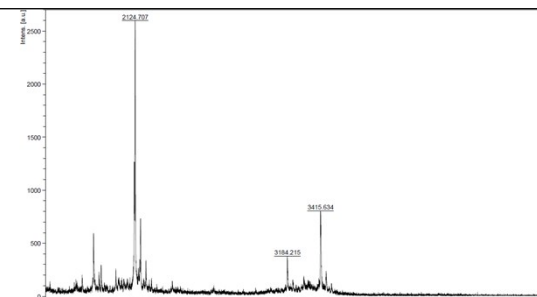

8  
 ATC-Trp **27b**, 0.2 % TFA  
 rt, 18 h  
 => yield 17 %  
 => degradation 73 %  
 mass calc. = 3415.5  
 mass found = 3417.1

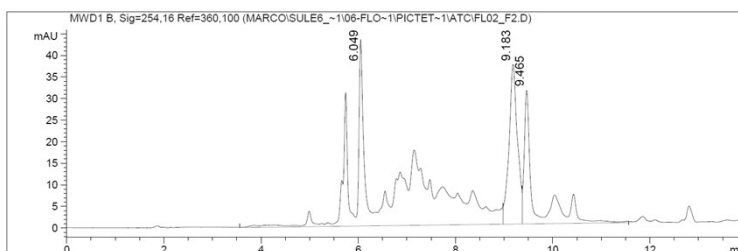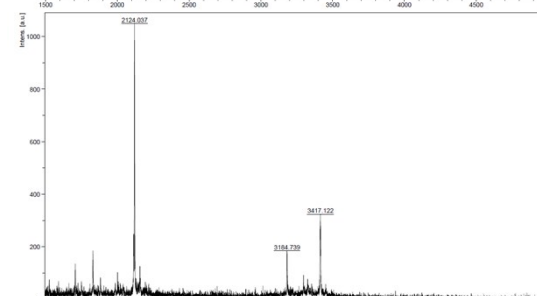

9  
 ATC-Trp **27b**, 0.5 % TFA  
 rt, 4 h  
 => yield 16 %  
 => degradation 60 %  
 mass calc. = 3415.5  
 mass found = 3418.5

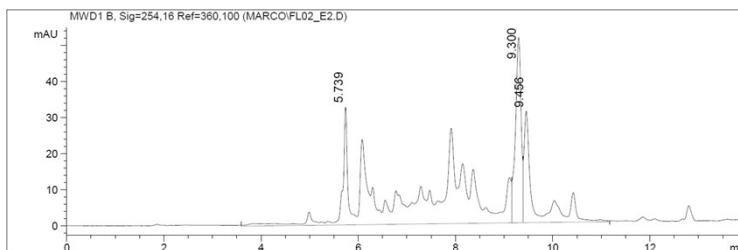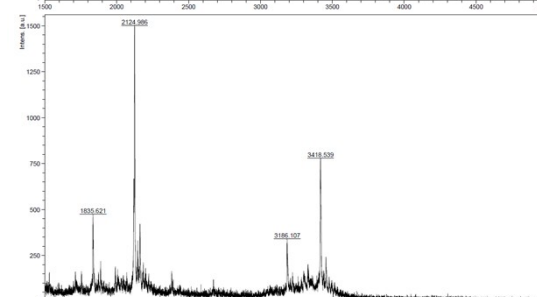

10  
 ATC-Trp **27b**, 0.5 % TFA  
 rt, 1 h  
 => yield 8 %  
 => degradation 40 %  
 mass calc. = 3415.5  
 mass found = 3421.7

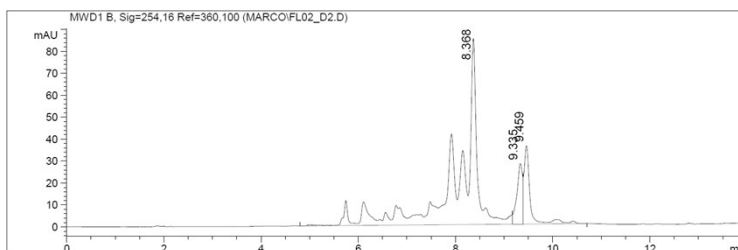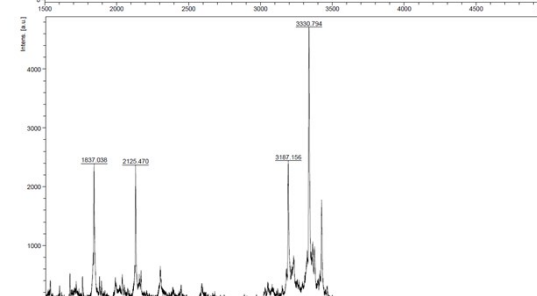

11 ATGC-Trp **27c**  
 mass calc. = 3381.7  
 mass found = 3388.4

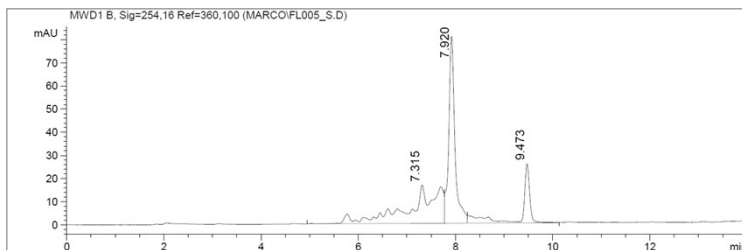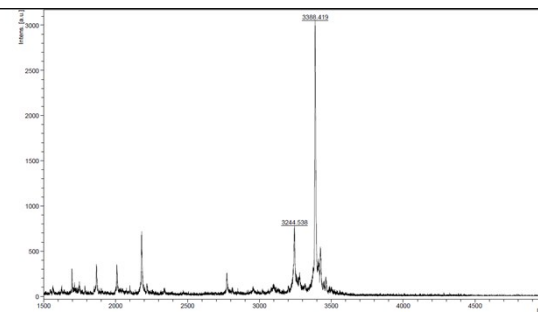

12 ATGC-Trp **27c**, 0.5%  
 TFA  
 rt, **18 h**  
 => yield = n.d.  
 => degradation 91 %  
 mass calc. = 3469.7  
 mass found = n.d.

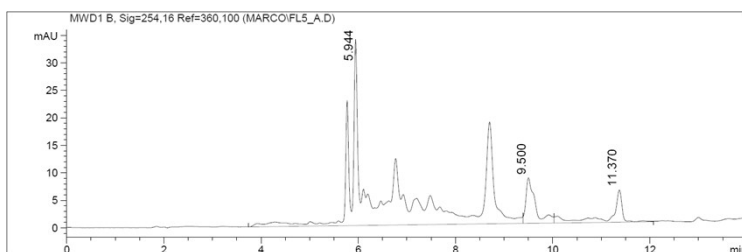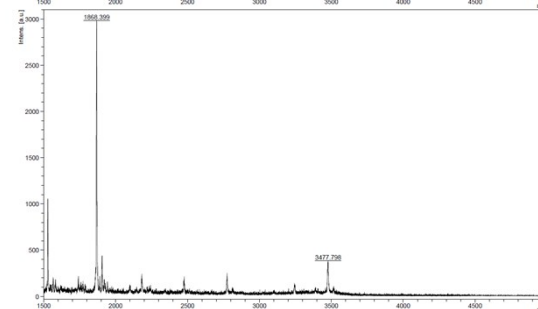

13 ATGC-Trp **27c**, 0.5 %  
 TFA  
 rt, **4 h**  
 => yield 18 %  
 => degradation 73 %  
 mass calc. = 3469.7  
 mass found = 3471.4

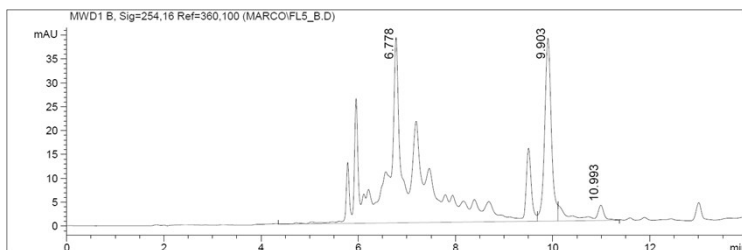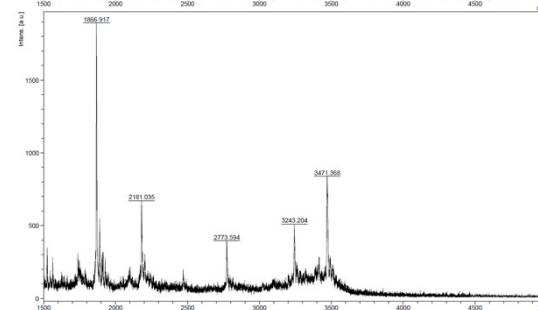

14 ATGC-Trp **27c**, 0.5 %  
 TFA  
 rt, **1 h**  
 => yield <5 %  
 => degradation 73 %  
 mass calc. = 3469.7  
 mass found = n.d.

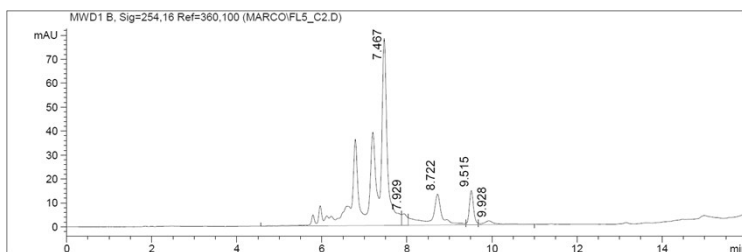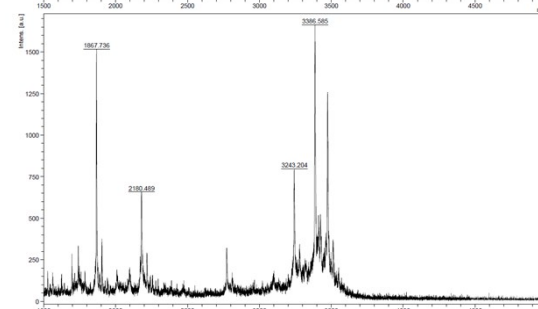

<sup>a</sup> CPG-bound oligonucleotide conjugate **27** (20 nmol), benzaldehyde **21a** (1000 equiv., 20 μmol) and trifluoroacetic acid (X %) in 50 μL CH<sub>2</sub>Cl<sub>2</sub> at ambient temperature. Afterwards AMA (30 % aqueous ammonia/40 % aqueous methylamine, 1:1 (vol/vol)) at ambient temperature for 4 h. <sup>b</sup> parameters that were changed are in bold and italic.. <sup>c</sup> Analytical RP-HPLC, Method-I.

**DNA conjugate 28b:** CPG-bound 10mer ATGC-Trp-NHFmoc conjugate **27c** was reacted with benzaldehyde **21a** and trifluoroacetic acid according to RP-05.

**HPLC trace of crude reaction mixture 28b (Analytical RP-HPLC, Method-I)**

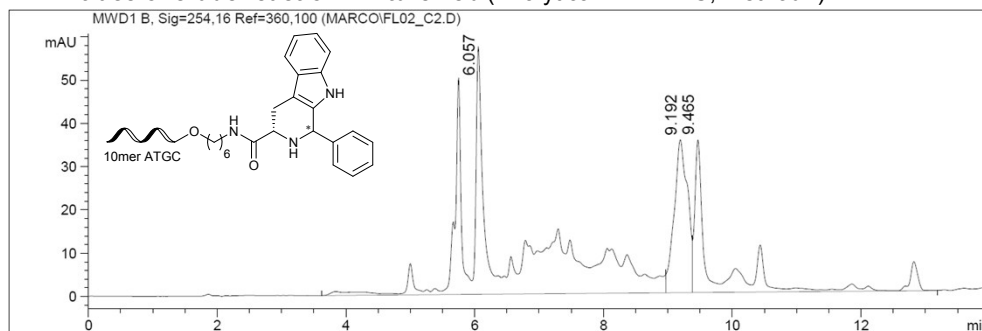

Peak list:

| Ret. Time | Width min | Height | Area     | Area % |
|-----------|-----------|--------|----------|--------|
| 6.057     | 0.585     | 57.377 | 2013.654 | 64.616 |
| 9.192     | 0.243     | 35.354 | 515.638  | 16.546 |
| 9.465     | 0.277     | 35.347 | 587.048  | 18.838 |

**HPLC trace of isolated product 28b (Analytical RP-HPLC, Method-I)**

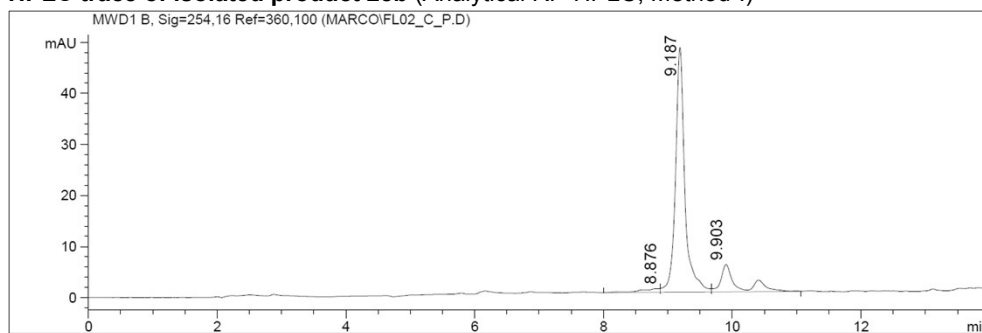

Peak list:

| Ret. Time | Width min | Height | Area    | Area % |
|-----------|-----------|--------|---------|--------|
| 8.876     | 0.348     | 0.717  | 14.958  | 2.521  |
| 9.187     | 0.168     | 47.965 | 483.235 | 81.437 |
| 9.903     | 0.296     | 5.359  | 95.195  | 16.043 |

**MALDI-MS spectrum of isolated product 28b**

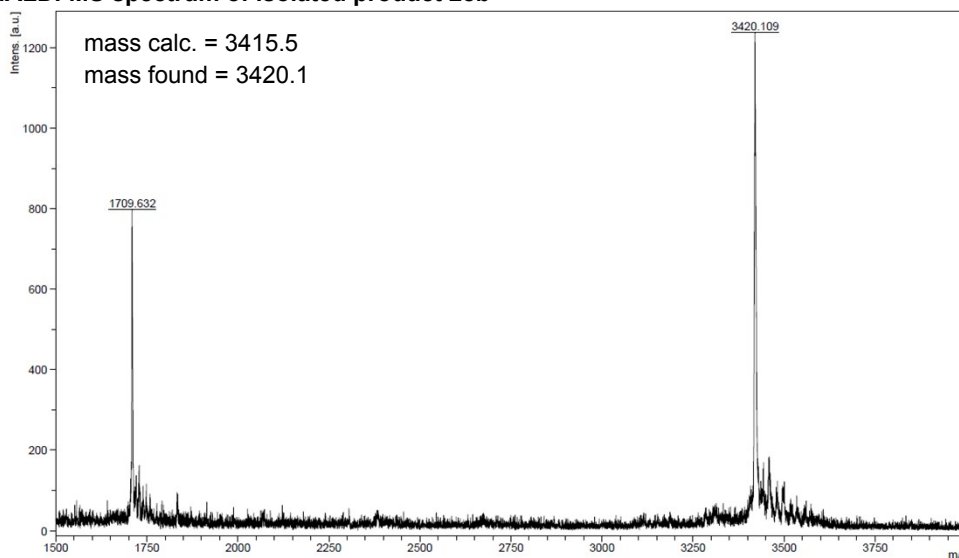

### Castagnoli-Cushman reaction on a CPG-bound coding DNA oligonucleotide

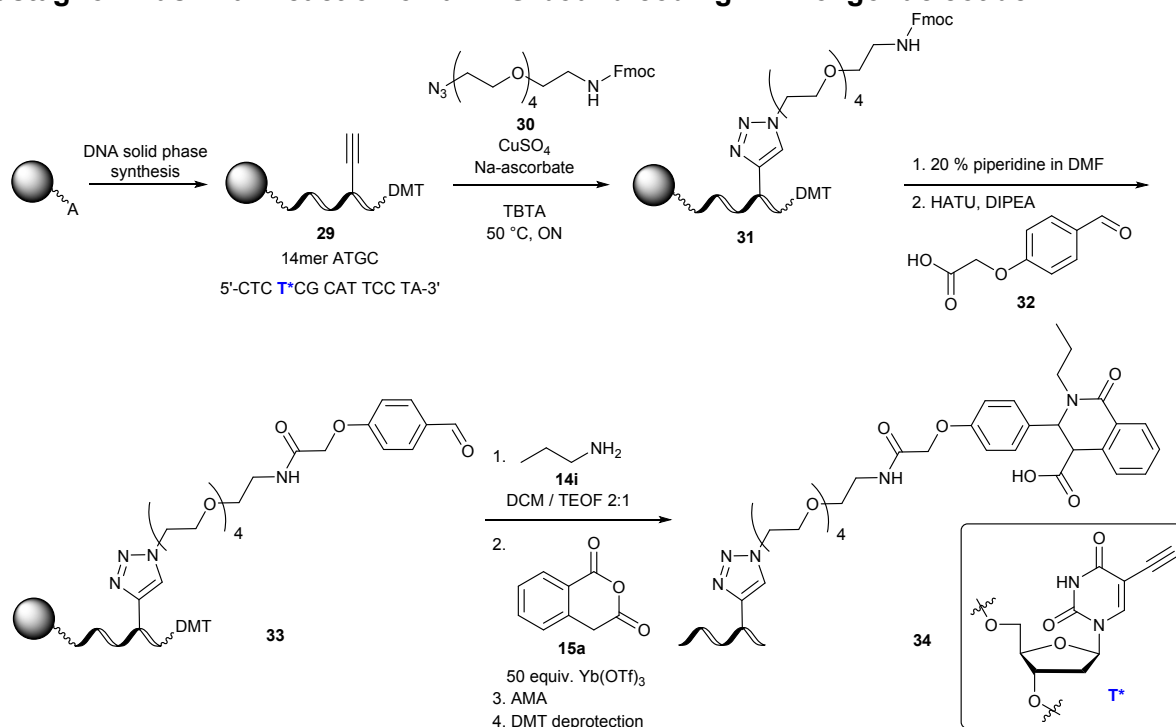

**Scheme S3** Castagnoli-Cushman reaction on a 14mer DNA oligonucleotide with linker moiety positioned in the sequence.

**DNA conjugate 31:** CPG-bound DNA-alkyne conjugate was reacted with 1-Fmoc-14-Azido-3,6,9,12-tetraoxatetradecan-1-amine according to RP-06.

**HPLC trace of crude reaction mixture 31 (Analytical RP-HPLC, Method-II)**

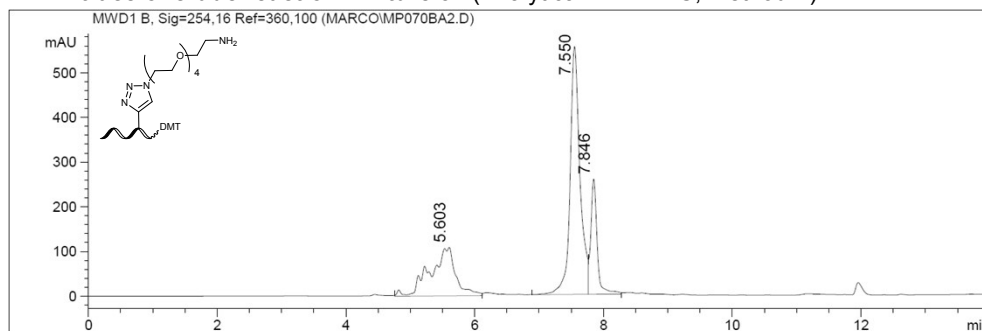

Peak list:

| Ret. Time | Width min | Height  | Area     | Area % |
|-----------|-----------|---------|----------|--------|
| 5.603     | 0.452     | 108.794 | 2949.263 | 27.714 |
| 7.550     | 0.178     | 555.743 | 5921.981 | 55.649 |
| 7.846     | 0.114     | 258.728 | 1770.348 | 16.636 |

**MALDI-MS spectrum of crude reaction mixture 31**

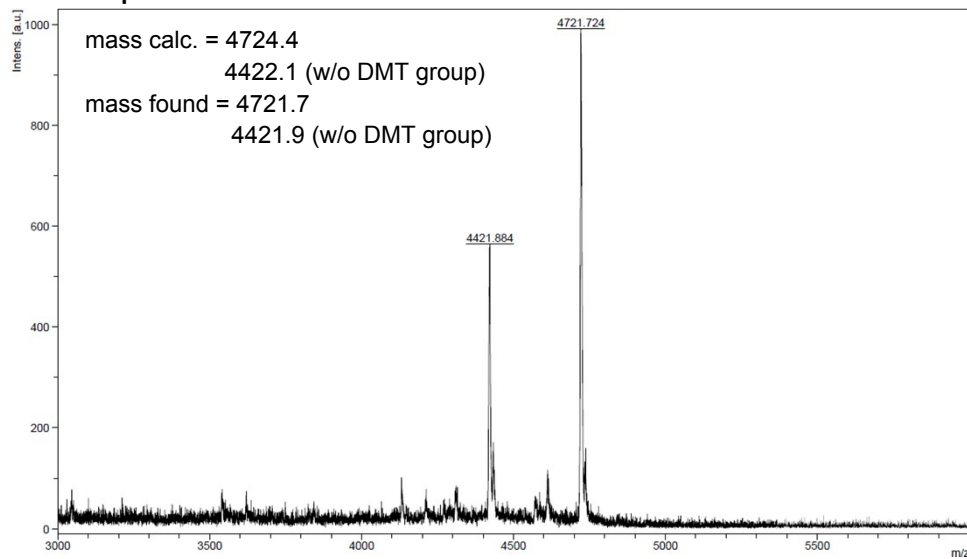



**DNA conjugate 32:** CPG-bound DNA-PEG<sub>4</sub> conjugate was reacted with 2-(4-formylphenoxy)acetic acid according to RP-02.

**HPLC trace of crude reaction mixture 32 (Analytical RP-HPLC, Method-II)**

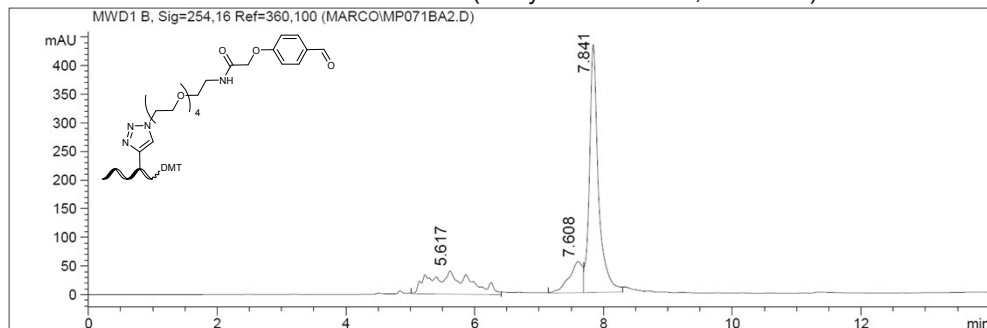

Peak list:

| Ret. Time | Width min | Height  | Area     | Area % |
|-----------|-----------|---------|----------|--------|
| 5.617     | 0.710     | 40.448  | 1722.062 | 25.758 |
| 7.608     | 0.243     | 54.105  | 789.454  | 11.808 |
| 7.841     | 0.161     | 433.448 | 4174.140 | 62.434 |

**MALDI-MS spectrum of crude reaction mixture 32**

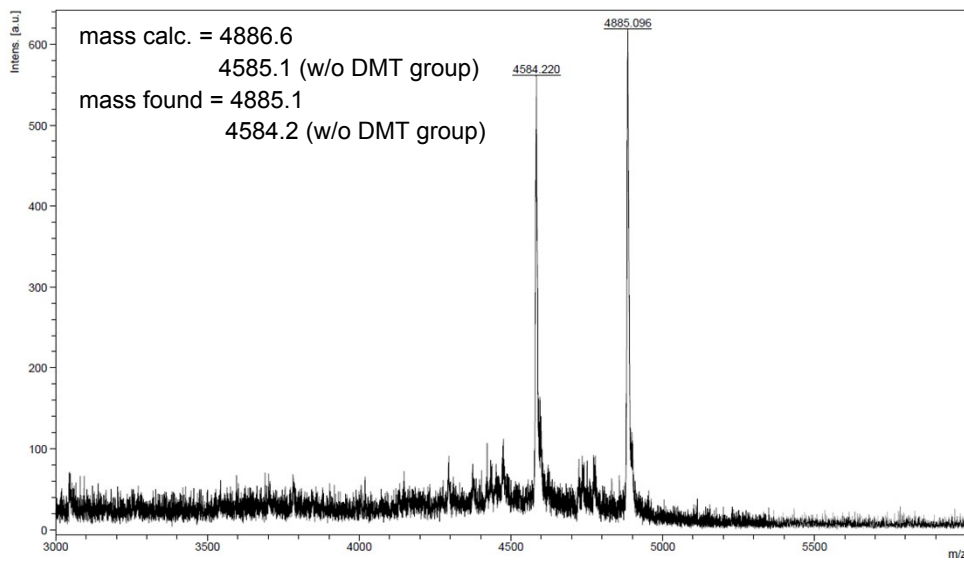

**DNA conjugate 33:** CPG-bound DNA-aldehyde conjugate **32** was reacted with aniline **14a** and homophthalic anhydride **15a** according to RP-03 followed by DMT removal using 40% AcOH for 30 min.

**HPLC trace of crude reaction mixture 33 (Analytical RP-HPLC, Method-II)**

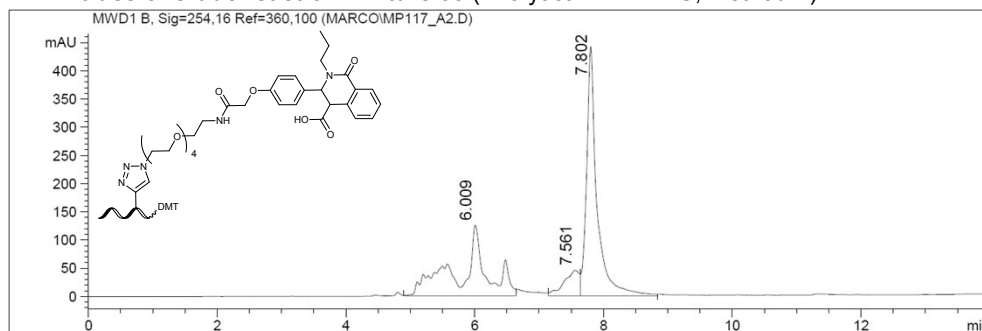

Peak list:

| Ret. Time | Width min | Height  | Area     | Area % |
|-----------|-----------|---------|----------|--------|
| 6.009     | 0.486     | 125.457 | 3657.017 | 39.281 |
| 7.561     | 0.277     | 45.529  | 757.085  | 8.132  |
| 7.802     | 0.184     | 442.589 | 4895.881 | 52.587 |

**HPLC trace of isolated product 33 after DMT removal (Analytical RP-HPLC, Method-II)**

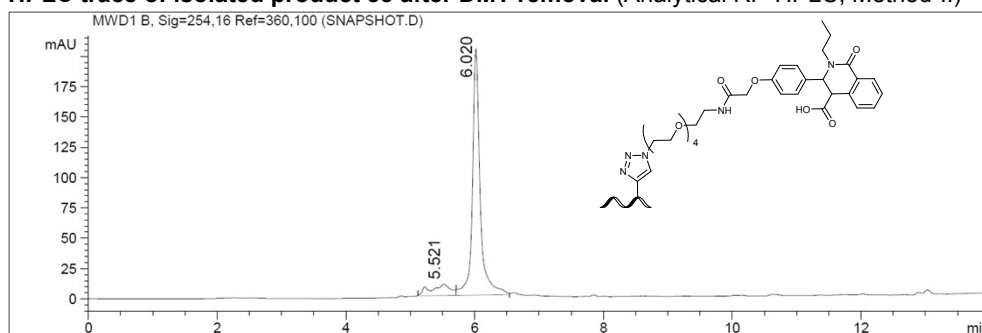

Peak list:

| Ret. Time | Width min | Height  | Area     | Area % |
|-----------|-----------|---------|----------|--------|
| 5.521     | 0.354     | 9.477   | 201.100  | 10.568 |
| 6.020     | 0.139     | 203.478 | 1701.798 | 89.432 |

**MALDI-MS spectrum of isolated product 33**

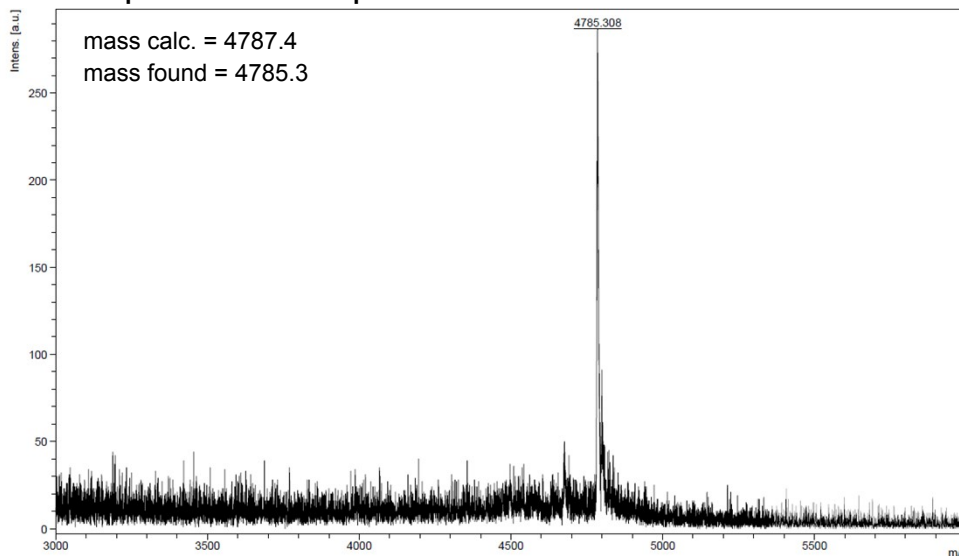

# DNA ligation

## General Methods and Materials

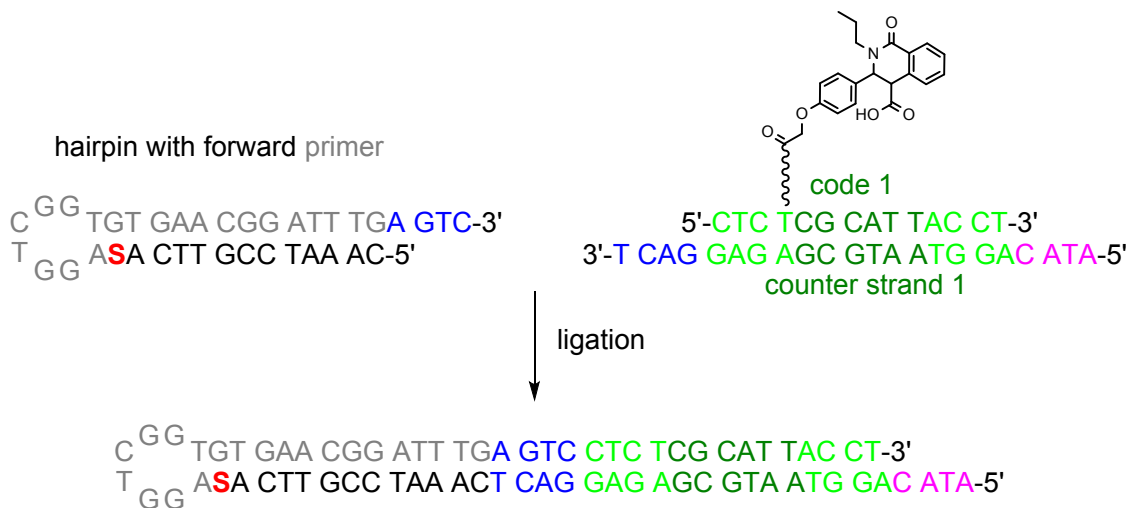

|                  | DNA sequence                                              |
|------------------|-----------------------------------------------------------|
| Hairpin          | 5'-CAA ATC CGT TCA S AGG TCG GTG TGA ACG GAT TTG AGT C-3' |
| Code 1           | 5'-CTC TTT ACC TAC CT-3'                                  |
| Counter strand 1 | 5'-ATA CAG GTA GGT AAA GAG GAC T-3'                       |

S = C<sub>6</sub>-Spacer

### 5'-phosphorylation of DNA

For 5'-phosphorylation of 280 pmol DNA in a total reaction volume of 20  $\mu$ L, 10 units of T4 polynucleotide kinase (T4 PNK, *Thermo Fisher Scientific*), 1x PNK Buffer A (500 mM Tris-HCl, 100 mM MgCl<sub>2</sub>, 50 mM DTT, 1 mM spermidine, pH = 7.6, 25 °C, *Thermo Fisher Scientific*) and 1 mM ATP (*Thermo Fisher Scientific*) were used. Reaction mixtures were incubated at 37 °C for 20 min, then heat-inactivated at 75 °C for 15 min and slowly cooled down to 4 °C.

### Ligation of DNA

Prior to enzymatic ligation of DNA, the oligonucleotides were annealed by incubation at 85 °C for 10 min and cooling down to 4 °C. For ligation (20  $\mu$ L scale), 100 pmol of each oligonucleotide, 600 units of T4 DNA Ligase (T4 DNA ligase rapid, *Biozym*) and 1x T4 DNA Ligase Buffer (500 mM Tris-HCl, 100 mM MgCl<sub>2</sub>, 50 mM DTT, 10 mM ATP, pH = 7.6 at 25 °C, *Biozym*) were mixed. Ligation reactions were performed at 25 °C for 16 h, then stopped by heat inactivation at 75 °C for 15 min and cooled down to 4 °C.

### **Analysis of DNA ligation**

For analysis of DNA ligation reactions, agarose gel electrophoresis was performed using a 5.5 % agarose gel. Electrophoresis was carried out in TBE buffer (89 mM Tris-borate, 2 mM EDTA, pH = 8.3) at 100 V constant voltage for 15 min and then 150 V constant voltage for about 45 min. For staining of the DNA, Midori Green Direct (*NIPPON Genetics*) and as a reference, GeneRuler Ultra Low Range DNA Ladder (*Thermo Fisher Scientific*) was used. Imaging of the gels was performed using the *Bio-Rad Gel Doc™ XR system*.

### **Purification of DNA**

DNA was precipitated by adding 1/10 volume of 3 M aq. sodium acetate (pH = 5.2) and 3 volumes of 100% ethanol and incubating this solution for about 4 h at -80 °C. Afterwards the samples were centrifuged at 4°C for 30 min (13200 rpm; *Centrifuge 5415 R, Eppendorf*), the supernatant was taken off and the DNA pellets were dried. The DNA samples were dissolved in water for analysis by agarose gel electrophoresis.
